# Supplementary material for: Phosphonoselenoic acid esters from the reaction between phosphoroselenoyl chlorides and Grignard reagents: synthetic and stereochemical aspects
Source: Royal Society of Chemistry journal article supplement (doi:10.1039/c6ra00318d), 2016-01-01

## Supporting Information

Phosphonoselenoic Acid Esters from the Reaction between Phosphoroselenoyl Chlorides and Grignard Reagents: Synthetic and Stereochemical Aspects

Toshiaki Murai,<sup>a</sup> Yuuki Maekawa,<sup>a</sup> Yuuki Hirai,<sup>a</sup> Kazuma Kuwabara,<sup>a</sup> and Mao Minoura<sup>b</sup>

*a Department of Chemistry and Biomolecular Science, Faculty of Engineering, Gifu University, Yanagido, Gifu 501-1193, Japan, e-mail:mtoshi@gifu-u.ac.jp*

*b Department of Chemistry, College of Science, Rikkyo University, Nishi-ikebukuro, Toshima-ku, Tokyo 171-8501, Japan.*

|                                                                                                   |     |
|---------------------------------------------------------------------------------------------------|-----|
| • General remarks                                                                                 | S1  |
| • DFT calculations                                                                                | S2  |
| • Synthesis of compounds <b>5</b> , <b>7–11</b>                                                   | S7  |
| • X-ray structure analysis                                                                        | S20 |
| • References                                                                                      | S21 |
| • <sup>1</sup> H and <sup>13</sup> C NMR spectra of all new compounds                             | S22 |
| • <sup>31</sup> P NMR spectra of <b>7</b> , <b>8</b> , <b>9</b> , and oxygen isologue of <b>7</b> | S49 |

**General Remarks:** The IR spectra were obtained on a JASCO FT/IR 410 spectrometer. The  $^1\text{H}$  NMR spectra were recorded on a JEOL  $\alpha$ -400 (400 MHz) in  $\text{CDCl}_3$ . Chemical shifts of protons were reported in  $\delta$  values referred to tetramethylsilane as an internal standard in  $\text{CDCl}_3$ , and the following abbreviations were used: s: singlet, d: doublet, t: triplet, m: multiplet. The  $^{13}\text{C}$  NMR spectra were measured on a JEOL  $\alpha$ -400 (100 MHz) in  $\text{CDCl}_3$ . The  $^{19}\text{F}$  NMR spectra were measured on a JEOL  $\alpha$ -400 (376 MHz) in  $\text{CDCl}_3$  and with  $\text{CF}_3\text{COOH}$  as an external standard. The  $^{31}\text{P}$  NMR spectra were measured on a JEOL  $\alpha$ -400 (162 MHz) in  $\text{CDCl}_3$  and with 85%  $\text{H}_3\text{PO}_4$  as an external standard. The  $^{77}\text{Se}$  NMR spectra were measured on a JEOL  $\alpha$ -400 (76 MHz) in  $\text{CDCl}_3$  and with  $\text{Me}_2\text{Se}$  as an external standard. All spectra were acquired in the proton-decoupled mode. The mass spectra (MS) and the high-resolution mass spectra (HRMS) were taken on a JMS-700 mass spectrometer. Melting points were determined using a Yanaco seisakusho MP-S2 micro melting point apparatus and are uncorrected.

**DFT calculations.****Table S1.** Coordinates (Å) of the optimized structure for **1a** calculated at the B3LYP/6-31G (d, p)

| level of theory |          |          |          |
|-----------------|----------|----------|----------|
| atom            | x        | y        | z        |
| C               | -0.08171 | -1.08404 | -3.42371 |
| C               | -0.28892 | -1.84507 | -2.32473 |
| C               | -1.07144 | -1.35736 | -1.23054 |
| C               | -1.65223 | -0.07843 | -1.31378 |
| C               | -1.39459 | 0.7076   | -2.4839  |
| C               | -0.6394  | 0.22403  | -3.49758 |
| H               | -0.8044  | -3.12656 | -0.00246 |
| H               | 0.51492  | -1.45359 | -4.24812 |
| H               | 0.13998  | -2.83604 | -2.2468  |
| C               | -1.25079 | -2.14092 | -0.04588 |
| C               | -2.44326 | 0.41146  | -0.20954 |
| H               | -1.804   | 1.70598  | -2.54221 |
| H               | -0.44775 | 0.83104  | -4.37347 |
| C               | -2.5263  | -0.351   | 0.92359  |
| C               | -1.93843 | -1.65039 | 1.00723  |
| H               | -2.06628 | -2.21695 | 1.92074  |
| C               | -3.11927 | 1.76333  | -0.23261 |
| C               | -4.10462 | 2.13589  | -1.21824 |
| C               | -2.82    | 2.65185  | 0.76246  |
| C               | -4.57777 | 1.22549  | -2.21848 |
| C               | -4.66054 | 3.42826  | -1.17547 |
| C               | -3.38352 | 3.96243  | 0.8092   |
| C               | -5.51313 | 1.60472  | -3.11999 |
| H               | -4.1833  | 0.21941  | -2.23609 |
| C               | -5.63834 | 3.80225  | -2.15126 |
| C               | -4.26134 | 4.33958  | -0.14565 |
| H               | -3.08968 | 4.62695  | 1.61179  |
| C               | -6.0493  | 2.92389  | -3.09434 |
| H               | -5.86677 | 0.90562  | -3.86738 |
| H               | -6.04688 | 4.80398  | -2.1101  |
| H               | -4.69612 | 5.33133  | -0.13371 |

|    |          |         |          |
|----|----------|---------|----------|
| H  | -6.79288 | 3.20814 | -3.82818 |
| O  | -3.27781 | 0.08406 | 2.04006  |
| O  | -1.8784  | 2.28894 | 1.7572   |
| P  | -2.588   | 1.31745 | 2.94405  |
| Se | -3.91934 | 2.19427 | 4.35174  |
| Cl | -0.78696 | 0.45348 | 3.64769  |

**Table S2.** Coordinates (Å) of the optimized structure for **1b** calculated at the B3LYP/6-31G (d, p) level of theory

| atom | x        | y        | z        |
|------|----------|----------|----------|
| C    | -0.1172  | -1.09217 | -3.45728 |
| C    | -0.33368 | -1.86961 | -2.34413 |
| C    | -1.08666 | -1.3792  | -1.24374 |
| C    | -1.65671 | -0.06352 | -1.31042 |
| C    | -1.39074 | 0.71991  | -2.46761 |
| C    | -0.64205 | 0.21993  | -3.50942 |
| H    | -0.83142 | -3.15654 | -0.03211 |
| H    | 0.46593  | -1.4758  | -4.28886 |
| H    | 0.08125  | -2.87194 | -2.28112 |
| C    | -1.25869 | -2.15876 | -0.06981 |
| C    | -2.42858 | 0.43064  | -0.19929 |
| H    | -1.77458 | 1.73127  | -2.5197  |
| H    | -0.44726 | 0.84286  | -4.37726 |
| C    | -2.48173 | -0.35796 | 0.93952  |
| C    | -1.92509 | -1.65041 | 1.01608  |
| H    | -2.0426  | -2.21296 | 1.93513  |
| C    | -3.11376 | 1.75381  | -0.21909 |
| C    | -4.0881  | 2.12253  | -1.21275 |
| C    | -2.84996 | 2.669    | 0.78608  |
| C    | -4.55579 | 1.21784  | -2.2058  |
| C    | -4.65652 | 3.44078  | -1.18117 |
| C    | -3.41266 | 3.95912  | 0.83818  |
| C    | -5.49558 | 1.60452  | -3.13488 |
| H    | -4.17304 | 0.20474  | -2.21997 |
| C    | -5.61145 | 3.81079  | -2.1659  |
| C    | -4.28344 | 4.34349  | -0.15009 |

|    |          |         |          |
|----|----------|---------|----------|
| H  | -3.14358 | 4.61186 | 1.6603   |
| C  | -6.02166 | 2.91712 | -3.12693 |
| H  | -5.84085 | 0.89136 | -3.87741 |
| H  | -6.02367 | 4.81571 | -2.1343  |
| H  | -4.72188 | 5.33708 | -0.13699 |
| H  | -6.75738 | 3.2103  | -3.86957 |
| O  | -3.16789 | 0.08838 | 2.07976  |
| O  | -1.95662 | 2.3149  | 1.81005  |
| P  | -2.57721 | 1.32695 | 2.96494  |
| Cl | -0.77382 | 0.62486 | 3.68596  |
| S  | -3.75838 | 2.00141 | 4.16334  |

**Table S3.** Coordinates (Å) of the optimized structure for **1c** calculated at the B3LYP/6-31G (d, p)

| level of theory |          |          |          |
|-----------------|----------|----------|----------|
| atom            | x        | y        | z        |
| C               | -0.12516 | -1.07903 | -3.46341 |
| C               | -0.34076 | -1.86179 | -2.35379 |
| C               | -1.09154 | -1.37601 | -1.24987 |
| C               | -1.66081 | -0.05969 | -1.3092  |
| C               | -1.39576 | 0.72921  | -2.4628  |
| C               | -0.64875 | 0.23377  | -3.50808 |
| H               | -0.83526 | -3.15973 | -0.04772 |
| H               | 0.45641  | -1.45901 | -4.29775 |
| H               | 0.07335  | -2.86478 | -2.29623 |
| C               | -1.26175 | -2.16142 | -0.07941 |
| C               | -2.43058 | 0.42944  | -0.19377 |
| H               | -1.77851 | 1.74119  | -2.5096  |
| H               | -0.45443 | 0.86098  | -4.37292 |
| C               | -2.48038 | -0.3643  | 0.94081  |
| C               | -1.9245  | -1.65755 | 1.01067  |
| H               | -2.03992 | -2.2237  | 1.92777  |
| C               | -3.11762 | 1.75157  | -0.20955 |
| C               | -4.08827 | 2.11796  | -1.20848 |
| C               | -2.85769 | 2.67042  | 0.79342  |
| C               | -4.5595  | 1.20676  | -2.19385 |
| C               | -4.64805 | 3.43982  | -1.19149 |

|    |          |         |          |
|----|----------|---------|----------|
| C  | -3.40467 | 3.96816 | 0.82493  |
| C  | -5.49532 | 1.59026 | -3.1283  |
| H  | -4.18363 | 0.191   | -2.19717 |
| C  | -5.59876 | 3.80661 | -2.18145 |
| C  | -4.26807 | 4.35068 | -0.17039 |
| H  | -3.12742 | 4.63118 | 1.63616  |
| C  | -6.01308 | 2.90614 | -3.13433 |
| H  | -5.84404 | 0.87191 | -3.86416 |
| H  | -6.0043  | 4.8145  | -2.16041 |
| H  | -4.69425 | 5.34963 | -0.1707  |
| H  | -6.74568 | 3.19658 | -3.8811  |
| O  | -3.15645 | 0.08055 | 2.08687  |
| O  | -1.97193 | 2.32485 | 1.8282   |
| P  | -2.56596 | 1.31483 | 2.97144  |
| Cl | -0.76105 | 0.63141 | 3.68992  |
| O  | -3.54205 | 1.83706 | 3.99073  |

NPA charge distribution and energy levels of LUMO+1 and LUMO+2 of **1** are shown in Table S4, and molecular orbitals of **1** are shown in Figure S1. The NPA charge distribution revealed that, even though the differences among **1a–1c** are small, the phosphorus atom of **1a** is the most positively charged, while that of **1b** is the least positively charged.

Table S4 NPA charge distribution and energy levels of LUMO+1 and LUMO+2 of **1**

|           |    | charge distribution |      |       | Energy level (eV) |        |        |
|-----------|----|---------------------|------|-------|-------------------|--------|--------|
|           |    | E                   | E    | P     | Cl                | LUMO+1 | LUMO+2 |
| <b>1a</b> | O  | -0.47               | 1.08 | -0.18 |                   | -1.38  | -0.82  |
| <b>1b</b> | S  | -0.24               | 0.80 | -0.15 |                   | -1.44  | -1.04  |
| <b>1c</b> | Se | -0.32               | 0.90 | -0.16 |                   | -1.71  | -1.11  |

## Molecular orbitals of 1

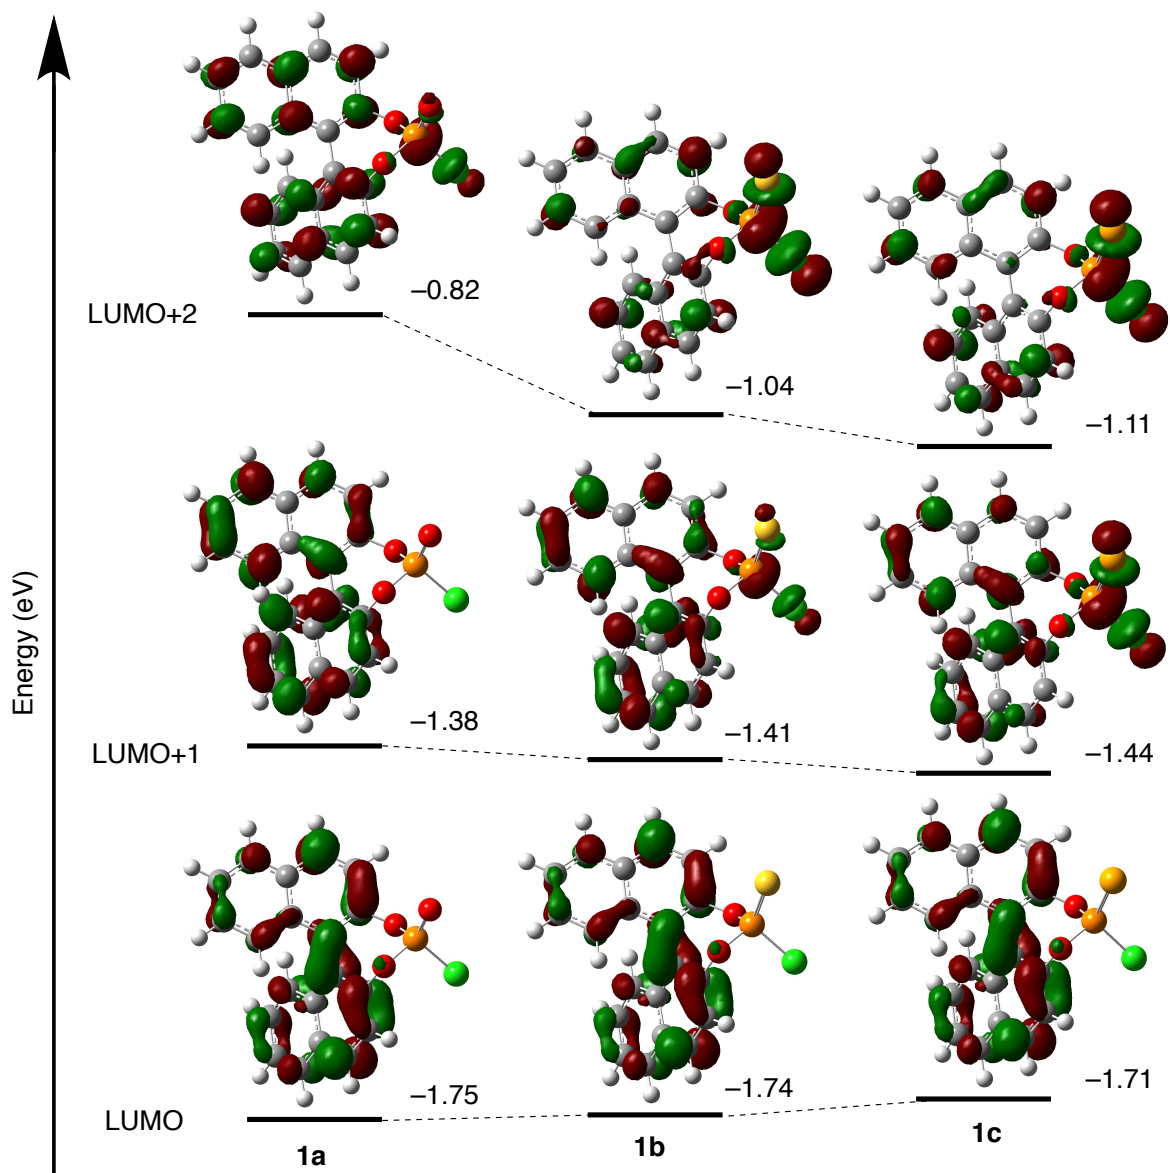

**Figure S1.** Energy diagrams and the pictorial representations of the selected Kohn–Sham molecular orbitals for the phosphoryl (**1a**), phosphorothionyl (**1b**), phosphoroselenoyl chlorides (**1c**) calculated at the B3LYP/6-31G(d,p) level.

## Synthesis of compounds **5**, **7–11**

Two synthetic procedures were used for phosphonoselenoic acid esters **5**, **7–9**

Typical Procedure A for the preparation of (*S*<sub>ax</sub>)-4-methylbinaphtho[2,1-d:1',2'-f][1,3,2]dioxaphosphepine-4-selenide (**5a**): Methylmagnesium bromide (**2a**) (0.68 M Et<sub>2</sub>O solution, 0.74 mL, 0.5 mmol) was added to a toluene solution (5 mL) of (*S*<sub>ax</sub>)-binaphthylphosphoroselenoic acid chloride ((*S*<sub>ax</sub>)-BISEPCl) (214 mg, 0.5 mmol) via syringe pump at 40 °C over 20 minutes, and it was stirred at that temperature for 30 min. After that, saturated NH<sub>4</sub>Cl aqueous solution was added to the resulting mixture and water was further added to dilute the solution. The aqueous phase was extracted with ether three times. The combined organic layer was dried over MgSO<sub>4</sub>, filtered, and concentrated. The crude product was purified by column chromatography on silica gel (CH<sub>2</sub>Cl<sub>2</sub> : hexane = 1 : 3, R<sub>f</sub> = 0.15) to give (*S*<sub>ax</sub>)-4-methylbinaphtho[2,1-d:1',2'-f][1,3,2]dioxaphosphepine-4-selenide (**5a**) (156 mg, 76%) as a colorless solid.

### (*S*<sub>ax</sub>)-4-Methylbinaphtho[2,1-d:1',2'-f][1,3,2]dioxaphosphepine-4-selenide (**5a**)

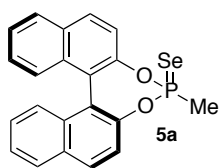

Chemical Formula: C<sub>21</sub>H<sub>15</sub>O<sub>2</sub>PSe  
Exact Mass: 410.00  
Molecular Weight: 409.28

mp: 214.3-214.9 °C; IR (KBr): 2913, 1618, 1587, 1505, 904, 865, 836, 812, 770, 752 cm<sup>-1</sup>; <sup>1</sup>H NMR (CDCl<sub>3</sub>) δ 2.10 (d, *J* = 13.5 Hz, 3H, CH<sub>3</sub>), 7.13-7.25 (m, 3H, Ar), 7.29-7.39 (m, 4H, Ar), 7.48 (d, *J* = 8.5 Hz, 1H, Ar), 7.84 (d, *J* = 8.1 Hz, 2H, Ar), 7.89-7.94 (m, 2H, Ar); <sup>13</sup>C NMR (CDCl<sub>3</sub>): δ 23.0 (δ, <sup>1</sup>J<sub>C-P</sub> = 86.4 Hz, CH<sub>3</sub>), 120.3, 121.6, 122.7, 125.7, 125.9, 126.6, 126.9, 127.2, 128.4, 128.6, 130.8, 131.1, 131.7, 132.0, 132.5, 132.6, 146.0, 146.2, 148.0, 148.2 (Ar); <sup>31</sup>P NMR (CDCl<sub>3</sub>): δ 115.7 (<sup>1</sup>J<sub>P-Se</sub> = 921.2 Hz); <sup>77</sup>Se NMR (CDCl<sub>3</sub>): δ -193.9 (<sup>1</sup>J<sub>P-Se</sub> = 921.2 Hz); MS (EI) *m/z* 410 (M<sup>+</sup>); HRMS Calcd for C<sub>21</sub>H<sub>15</sub>O<sub>2</sub>PSe: 409.9975, Found: 409.9974.

### (*S*<sub>ax</sub>)-4-(*p*-Tolyl)binaphtho[2,1-d:1',2'-f][1,3,2]dioxaphosphepine-4-selenide (**5b**)

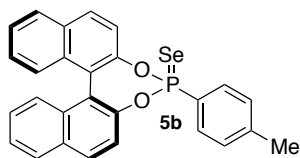

Chemical Formula: C<sub>27</sub>H<sub>19</sub>O<sub>2</sub>PSe  
Exact Mass: 486.03  
Molecular Weight: 485.37

The compound was synthesized *via* Procedure A, with 4-methylmagnesium bromide (**2b**) (0.5 M Et<sub>2</sub>O solution, 5.0 mL, 2.5 mmol), toluene (10 mL), and (*S*<sub>ax</sub>)-BISEPCl (1.07 g, 2.5 mmol). Purification by column chromatography on silica gel (CH<sub>2</sub>Cl<sub>2</sub> : hexane = 1 : 3, R<sub>f</sub> = 0.18) gave the corresponding ester (**5b**) (1.05 g, 86%) as a colorless solid.

mp: 197.7-198.2 °C; IR (KBr): 2917, 2863, 1618, 1589, 1507, 1462, 1434, 854, 805, 771, 754 cm<sup>-1</sup>;



$^1\text{H}$  NMR ( $\text{CDCl}_3$ )  $\delta$  2.36 (s, 3H,  $\text{CH}_3$ ), 6.90 (dd,  $J = 9.0, 0.9$  Hz, 1H, Ar), 7.12-7.15 (m, 2H, Ar), 7.24-7.38 (m, 3H, Ar), 7.46-7.50 (m, 3H, Ar), 7.58-7.67 (m, 3H, Ar), 7.78 (d,  $J = 9.0$  Hz, 1H, Ar), 7.89 (d,  $J = 8.1$ , 1H, Ar), 7.98 (d,  $J = 8.1$  Hz, 1H, Ar), 8.07 (d,  $J = 9.0$  Hz, 1H, Ar);  $^{13}\text{C}$  NMR ( $\text{CDCl}_3$ ):  $\delta$  21.6 ( $\text{CH}_3$ ), 121.1 (d,  $J_{\text{P-C}} = 1.9$  Hz), 121.9 (d,  $J_{\text{P-C}} = 1.9$  Hz), 122.3 (d,  $J_{\text{P-C}} = 2.8$  Hz), 122.8 (d,  $J_{\text{P-C}} = 2.8$  Hz), 125.7, 126.5, 126.6, 127.0, 127.2, 128.4, 128.5, 128.7, 128.9, 130.4, 130.7, 131.5, 131.7, 131.9, 132.0, 132.4, 132.6, 144.2 (d,  $J_{\text{P-C}} = 2.8$  Hz), 145.9, 146.0, 148.3, 148.5 (Ar);  $^{31}\text{P}$  NMR ( $\text{CDCl}_3$ ):  $\delta$  110.0 ( $^1J_{\text{P-Se}} = 929.1$  Hz);  $^{77}\text{Se}$  NMR ( $\text{CDCl}_3$ ):  $\delta$  -242.8 ( $^1J_{\text{P-Se}} = 929.1$  Hz); MS (EI)  $m/z$  486 ( $\text{M}^+$ ); HRMS Calcd for  $\text{C}_{27}\text{H}_{19}\text{O}_2\text{PSe}$ : 486.0288, Found: 486.0290.

#### ( $S_{\text{ax}}$ )-4-Ethylbinaphtho[2,1-d:1',2'-f][1,3,2]dioxaphosphepine-4-selenide (**5c**)

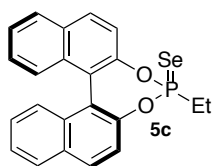

Chemical Formula:  $\text{C}_{22}\text{H}_{17}\text{O}_2\text{PSe}$   
Exact Mass: 424.01  
Molecular Weight: 423.30

The compound was synthesized *via* Procedure A, with ethylmagnesium bromide (**2c**) (0.79 M  $\text{Et}_2\text{O}$  solution, 0.63 mL, 0.5 mmol), toluene (5 mL), and ( $S_{\text{ax}}$ )-BISEPCl (215 mg, 0.5 mmol). Purification by column chromatography on silica gel ( $\text{CH}_2\text{Cl}_2$  : hexane = 1 : 3,  $R_f = 0.18$ ) gave the corresponding ester (**5c**) (153 mg, 72%) as a colorless solid.

mp: 238.6-239.5  $^\circ\text{C}$ ; IR (KBr): 2981, 2939, 1640, 1618, 1587, 1505, 1460, 1430, 951, 856, 813, 767, 753  $\text{cm}^{-1}$ ;  $^1\text{H}$  NMR ( $\text{CDCl}_3$ )  $\delta$  1.38 (dt,  $J = 23.9$  Hz, 7.81 Hz, 3H,  $\text{PCH}_2\text{CH}_3$ ), d 2.27 (dq,  $J = 14.6$  Hz, 7.32 Hz, 2H,  $\text{PCH}_2\text{CH}_3$ ), 7.25-7.34 (m, 3H, Ar), 7.39-7.51 (m, 4H, Ar), 7.58 (d,  $J = 8.8$  Hz, 1H, Ar), 7.96 (d,  $J = 8.3$  Hz, 2H, Ar), 8.02 (m, 2H, Ar);  $^{13}\text{C}$  NMR ( $\text{CDCl}_3$ ):  $\delta$  7.30 (d,  $^2J_{\text{C-P}} = 2.8$  Hz,  $\text{PCH}_2\text{CH}_3$ ), d 27.8 (d,  $^1J_{\text{C-P}} = 81.7$  Hz,  $\text{PCH}_2\text{CH}_3$ ), 120.2, 121.7, 122.5, 122.7, 125.6, 125.8, 126.5, 126.9, 127.2, 128.4, 128.5, 130.7, 131.0, 131.6, 131.9, 132.6, 146.1, 146.2, 148.1, 148.3 (Ar);  $^{31}\text{P}$  NMR ( $\text{CDCl}_3$ ):  $\delta$  128.0 ( $^1J_{\text{P-Se}} = 920.8$  Hz);  $^{77}\text{Se}$  NMR ( $\text{CDCl}_3$ ):  $\delta$  -251.2 ( $^1J_{\text{P-Se}} = 920.8$  Hz); MS (EI)  $m/z$  424 ( $\text{M}^+$ ); HRMS Calcd for  $\text{C}_{22}\text{H}_{17}\text{O}_2\text{PSe}$ : 424.0131, Found: 424.0146.

#### ( $S_{\text{ax}}$ )-4-Benzylbinaphtho[2,1-d:1',2'-f][1,3,2]dioxaphosphepine-4-selenide (**5d**)

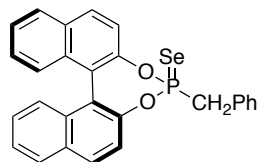

Chemical Formula:  $\text{C}_{27}\text{H}_{19}\text{O}_2\text{PSe}$   
Exact Mass: 486.03  
Molecular Weight: 485.37

The compound was synthesized *via* Procedure A, with benzylmagnesium bromide (**2d**) (0.19 M THF solution, 20.6 mL, 4.0 mmol), toluene (20 mL), and ( $S_{\text{ax}}$ )-BISEPCl (1.72 g, 4.0 mmol). Purification by column chromatography on silica gel ( $\text{CH}_2\text{Cl}_2$  : hexane = 1 : 3,  $R_f = 0.18$ ) gave the corresponding ester (**5d**) (1.62 g, 83%) as a colorless solid

mp: 94-100  $^\circ\text{C}$ ; IR (KBr): 1588, 1462, 1321, 1222, 1067, 951, 856, 750, 695, 600, 563, 508  $\text{cm}^{-1}$ ;  $^1\text{H}$  NMR ( $\text{CDCl}_3$ ):  $\delta$  3.64-3.79 (m, 2H,  $\text{PCH}_2$ ), 7.23-7.35 (m, 6H), 7.38-7.52 (m, 7H), 7.93 (d,  $J = 8.7$  Hz, 1H), 7.95 (d,  $J = 8.7$  Hz, 1H), 7.99 (d,  $J = 9.2$  Hz, 1H), 8.00 (d,  $J = 8.7$  Hz, 1H, Ar)  $^{13}\text{C}$  NMR ( $\text{CDCl}_3$ ):  $\delta$  42.4 (d,  $^1J_{\text{C-P}} = 78.2$  Hz,  $\text{PCH}_2$ ), 120.7, 122.0, 122.6, 122.9, 125.8, 126.0, 126.7, 127.0, 127.4, 127.8, 128.6, 128.7, 128.8, 130.0 (d,  $J = 5.7$  Hz, Ar), 130.6, 130.7, 130.9, 131.1,

131.7, 132.1, 132.7, 132.8, 146.2 (d,  $J = 9.5$  Hz, Ar), 148.5 (d,  $J = 13.4$  Hz, Ar);  $^{31}\text{P}$  NMR ( $\text{CDCl}_3$ ):  $\delta$  117.8 ( $^1J_{\text{P-Se}} = 934.3$  Hz);  $^{77}\text{Se}$  NMR ( $\text{CDCl}_3$ ):  $\delta$  -222.3 ( $^1J_{\text{P-Se}} = 934.3$  Hz); MS (EI)  $m/z$  486 ( $\text{M}^+$ ); HRMS Calcd for  $\text{C}_{27}\text{H}_{19}\text{O}_2\text{PSe}$ : 486.0288, Found: 486.0267.

**( $S_{\text{ax}}$ )-4-(2-Phenylethyl)-dinaphtho[2,1- $d$ :1',2'- $f$ ][1,3,2]dioxaphosphepin-4-selenide (**5e**)<sup>S1)</sup>**

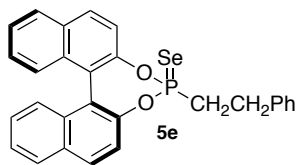

Chemical Formula:  $\text{C}_{28}\text{H}_{21}\text{O}_2\text{PSe}$   
Exact Mass: 500.04  
Molecular Weight: 499.40

The following compound was synthesized *via* Procedure A, with phenethylmagnesium bromide (**2e**) (0.68 M THF solution, 11.8 ml, 8.0 mmol), toluene (40 mL), and ( $S_{\text{ax}}$ )-BISEPCI (3.43 g, 8.0 mmol). Purification by column chromatography on silica gel ( $\text{CH}_2\text{Cl}_2$  : hexane = 1 : 3,  $R_f = 0.28$ ) gave the corresponding ester (**5e**) (2.79 g, 79%) as a colorless solid

$^1\text{H}$  NMR ( $\text{CDCl}_3$ ):  $\delta$  2.51-2.61 (m, 2H), 3.06-3.17 (m, 1H), 3.22-3.33 (m, 1H), 7.16 (d,  $J = 8.7$  Hz, 1H), 7.23-7.36 (m, 8H), 7.39 (d,  $J = 8.2$  Hz, 1H), 7.46-7.51 (m, 2H), 7.59 (dd,  $J = 0.9, 8.7$  Hz, 1H), 7.94 (d,  $J = 9.2$  Hz, 1H), 7.96 (d,  $J = 9.2$  Hz, 2H), 8.05 (d,  $J = 9.2$  Hz, 1H, Ar)

Typical procedure B for the preparation of ( $S_{\text{ax}}$ )-4-((trimethylsilyl)methyl)binaphtho[2,1- $d$ :1',2'- $f$ ][1,3,2]dioxaphosphepine-4-selenide (**5f**): To a two-necked flask were added ( $S_{\text{ax}}$ )-binaphthylphosphoroselenoic acid chloride (( $S_{\text{ax}}$ )-BISEPCI) (645.0 mg, 1.5 mmol), DMAP (366.1 mg, 3.0 mmol), and toluene (7.5 mL) under Ar atmosphere. The reaction mixture was stirred for 30 min. After that, (trimethylsilyl)methylmagnesium chloride (**2f**) (0.76 M THF solution, 1.97 ml, 1.5 mmol) was added to the suspension via syringe pump at 40 °C over 20 min, and it was stirred at that temperature for 30 min. After that, saturated  $\text{NH}_4\text{Cl}$  aqueous solution was added to the resulting mixture, and water was further added to dilute the solution. The aqueous phase was extracted with ether three times. The combined organic layer was dried over  $\text{Na}_2\text{SO}_4$  or  $\text{MgSO}_4$ , filtered, and concentrated. The crude product was purified by column chromatography on silica gel ( $\text{CH}_2\text{Cl}_2$  : hexane = 1 : 3,  $R_f = 0.28$ ) to give ( $S_{\text{ax}}$ )-4-((trimethylsilyl)methyl)binaphtho[2,1- $d$ :1',2'- $f$ ][1,3,2]dioxaphosphepine-4-selenide (**5f**) (474.1 mg, 66%) as a colorless solid.

**( $S_{\text{ax}}$ )-4-((Trimethylsilyl)methyl)binaphtho[2,1- $d$ :1',2'- $f$ ][1,3,2]dioxaphosphepine-4-selenide (**5f**)**

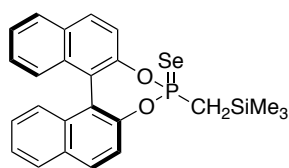

Chemical Formula:  $\text{C}_{24}\text{H}_{23}\text{O}_2\text{PSeSi}$   
Exact Mass: 482.04  
Molecular Weight: 481.46

mp: 92-97 °C; IR (KBr): 3055, 2952, 2924, 1620, 1588, 1508, 1462, 1432, 1360, 1322, 1251, 1223, 11200, 1155, 1096, 1070, 979, 952, 852, 832, 814, 749, 709, 696, 672, 654, 605, 563  $\text{cm}^{-1}$ ;  $^1\text{H}$  NMR ( $\text{CDCl}_3$ ):  $\delta$  0.29 (s, 9H,  $\text{Si}(\text{CH}_3)_3$ ), 1.87 (dd,  $J = 13.2, 16.6$  Hz, 1H), 1.98 (dd,  $J = 13.2, 22.3$  Hz, 1H), 7.27-7.36 (m, 3H), 7.42-7.52 (m, 4H), 7.55 (dd,  $J =$

1.2, 9.2 Hz, 1H), 7.95 (d,  $J = 7.5$  Hz, 1H), 7.97 (d,  $J = 8.1$  Hz, 1H), 8.02 (d,  $J = 8.6$  Hz, 1H), 8.03 (d,  $J = 8.6$  Hz, 1H, Ar);  $^{13}\text{C}$  NMR ( $\text{CDCl}_3$ ):  $\delta$  0.04 (d,  $^3J_{\text{C-P}} = 3.6$  Hz Si( $\underline{\text{C}}\text{H}_3$ )<sub>3</sub>), 25.3 (d,  $^1J_{\text{C-P}} = 64.8$  Hz,  $\text{P}\underline{\text{C}}\text{H}_2$ ), 122.9, 122.1, 123.0 (d,  $J = 2.4$  Hz, Ar), 123.1 (d,  $J = 2.4$  Hz, Ar), 125.7, 125.8, 126.5, 126.9, 127.1, 127.4, 128.5, 128.7, 130.7, 130.9, 131.7, 132.0, 132.7, 132.8, 146.6 (d,  $J = 10.8$  Hz, Ar), 148.2 (d,  $J = 14.4$  Hz, Ar);  $^{31}\text{P}$  NMR ( $\text{CDCl}_3$ ):  $\delta$  119.2 ( $^1J_{\text{P-Se}} = 907.6$  Hz);  $^{77}\text{Se}$  NMR ( $\text{CDCl}_3$ ):  $\delta$  -173.0 ( $^1J_{\text{P-Se}} = 907.6$  Hz); MS (EI)  $m/z$  482 ( $\text{M}^+$ ); HRMS Calcd for  $\text{C}_{24}\text{H}_{23}\text{O}_2\text{PSeSi}$ : 482.0370, Found:482.0368.

#### ( $S_{\text{ax}}$ )-4-Neopentylbinaphtho[2,1- $d$ :1',2'- $f$ ][1,3,2]dioxaphosphepine-4-selenide (**5g**)

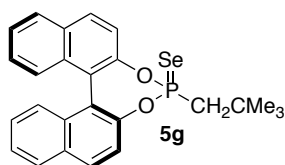

Chemical Formula:  $\text{C}_{25}\text{H}_{23}\text{O}_2\text{PSe}$   
Exact Mass: 466.06  
Molecular Weight: 465.38

The following compound was synthesized *via* Procedure B, with neopentylmagnesium bromide (**2g**) (0.31 M THF solution, 9.7 ml, 3.0 mmol), toluene (18 mL), DMAP (0.74 g, 6.0 mmol) and ( $S_{\text{ax}}$ )-BISEPCI (1.29 g, 3.0 mmol). Purification by column chromatography on silica gel ( $\text{CH}_2\text{Cl}_2$  : hexane = 1 : 3,  $R_f = 0.28$ ) gave the corresponding ester (**5g**) (0.92 g, 66%) as a colorless solid.

mp: 194-195 °C; IR (KBr): 2959, 1587, 1508, 1462, 1363, 1324, 1220, 1156, 1070, 1028, 977, 951, 836, 816, 751, 694, 595, 570  $\text{cm}^{-1}$ ;  $^1\text{H}$  NMR ( $\text{CDCl}_3$ ):  $\delta$  1.27 (s, 9H,  $\text{C}(\underline{\text{C}}\text{H}_3)_3$ ), 2.37 (d,  $J = 15$  Hz, 2H,  $\text{P}\underline{\text{C}}\text{H}_2$ ), 7.25-7.33 (m, 3H), 7.39-7.49 (m, 4H), 7.56 (dd,  $J = 1.4, 8.7$  Hz, 1H), 7.95 (d,  $J = 8.2$  Hz, 1H), 7.96 (d,  $J = 8.2$  Hz, 1H), 8.02 (d,  $J = 9.2$  Hz, 1H), 8.03 (d,  $J = 8.7$  Hz, 1H, Ar);  $^{13}\text{C}$  NMR ( $\text{CDCl}_3$ ):  $\delta$  30.8, 31.1, 31.2, 46.9 ( $^1J_{\text{C-P}} = 74.4$  Hz,  $\text{P}\underline{\text{C}}\text{H}_2$ ), 120.8, 122.3, 122.7, 123.0, 123.0, 125.7, 125.9, 126.6, 126.9, 127.1, 127.5, 128.5, 128.7, 130.6, 131.0, 131.6, 132.0, 132.7, 132.8, 146.2 (d,  $J = 11.4$  Hz, Ar), 148.5 (d,  $J = 15.3$  Hz, Ar);  $^{31}\text{P}$  NMR ( $\text{CDCl}_3$ ):  $\delta$  118.8 ( $^1J_{\text{P-Se}} = 924.3$  Hz);  $^{77}\text{Se}$  NMR ( $\text{CDCl}_3$ ):  $\delta$  -173.6 ( $^1J_{\text{P-Se}} = 924.3$  Hz); MS (EI)  $m/z$  466 ( $\text{M}^+$ ); HRMS Calcd for  $\text{C}_{25}\text{H}_{23}\text{O}_2\text{PSe}$ : 466.0601, Found:466.0604.

#### ( $S_{\text{ax}}$ )-4-Cyclohexylbinaphtho[2,1- $d$ :1',2'- $f$ ][1,3,2]dioxaphosphepine-4-selenide (**5h**)

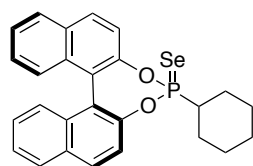

Chemical Formula:  $\text{C}_{26}\text{H}_{23}\text{O}_2\text{PSe}$   
Exact Mass: 478.06  
Molecular Weight: 477.39

The following compound was synthesized *via* Procedure A, with cyclohexylmagnesium bromide (**2h**) (1.09 M THF solution, 5.5 mL, 5.0 mmol), toluene (24 mL), and ( $S_{\text{ax}}$ )-BISEPCI (2.15 g, 5.0 mmol). Purification by column chromatography on silica gel ( $\text{CH}_2\text{Cl}_2$  : hexane = 1 : 3,  $R_f = 0.13$ ) gave the corresponding ester (**5h**) (1.66 g, 69%) as a colorless solid.

mp: 237.1-238.0 °C; IR (KBr): 3054, 2929, 2854, 1587, 1508, 1227, 1069, 953, 860, 694, 566  $\text{cm}^{-1}$ ;  $^1\text{H}$  NMR ( $\text{CDCl}_3$ )  $\delta$  1.13-1.21 (m, 1H,  $\text{P}\underline{\text{C}}\text{H}\underline{\text{C}}_5\text{H}_{10}$ ), 1.24-1.34 (m, 2H), 1.62-1.80 (m, 4H), 1.92-2.03 (m, 2H), 2.12-2.21 (m, 2H), 7.23-7.31 (m, 3H, Ar), 7.38-7.49 (m, 4H, Ar), 7.56 (d,  $J = 8.59$  Hz, 1H, Ar), 7.92 (d,  $J = 4.58$  Hz, 1H, Ar), 7.94 (d,  $J = 4.58$  Hz, 1H, Ar), 8.00 (d,  $J = 9.16$  Hz, 1H, Ar), 8.02

(d,  $J = 9.16$  Hz, 1H, Ar);  $^{13}\text{C}$  NMR ( $\text{CDCl}_3$ ):  $\delta$  25.1, 25.2, 25.2, 25.4, (d,  $J_{\text{C-P}} = 6.0$  Hz,  $\text{PCHCH}_2\text{CH}_2$ ) 26.1 (d,  $J_{\text{C-P}} = 12.0$  Hz,  $\text{PCHCH}_2\text{CH}_2$ ), 41.7 (d,  $J_{\text{C-P}} = 78.0$  Hz,  $\text{PCHC}_5\text{H}_{10}$ ), 120.12, 121.9, 122.4, 122.7, 125.5, 125.7, 126.4, 126.7, 126.8, 127.2, 128.3, 128.5, 130.6, 130.9, 131.4, 131.8, 132.5, 132.7, 146.1, 146.2, 148.4, 148.5;  $^{31}\text{P}$  NMR ( $\text{CDCl}_3$ ):  $\delta$  132.6 ( $^1J_{\text{P-Se}} = 921.5$  Hz);  $^{77}\text{Se}$  NMR ( $\text{CDCl}_3$ ):  $\delta$  -285.2 (d,  $^1J_{\text{P-Se}} = 921.5$  Hz); MS (EI)  $m/z$  478 ( $\text{M}^+$ ); HRMS Calcd for  $\text{C}_{26}\text{H}_{23}\text{O}_2\text{PSe}$ : 478.0601, Found: 478.0589.

#### **( $S_{\text{ax}}$ )-4-(*tert*-Butyl)binaphtho[2,1-*d*:1',2'-*f*][1,3,2]dioxaphosphepine-4-selenide (**5i**)**

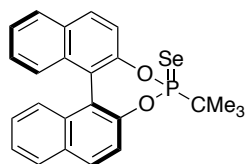

Chemical Formula:  $\text{C}_{24}\text{H}_{21}\text{O}_2\text{PSe}$   
Exact Mass: 452.04  
Molecular Weight: 451.36

The following compound was synthesized *via* Procedure A, with *tert*-butylmagnesium chloride (**2i**) (0.79 M THF solution, 5.10 ml, 4.0 mmol), toluene (40 mL), and ( $S_{\text{ax}}$ )-BISEPCl (1.73 g, 4.0 mmol). Purification by column chromatography on silica gel (EtOAc : hexane = 1 : 10,  $R_f = 0.40$ ) gave the corresponding ester (**5i**) (1.59 g, 87%) as a colorless solid.

mp: 267-268 °C; IR (KBr): 3061, 2970, 1590, 1506, 1462, 1321, 1225, 1071, 953, 839, 756, 650  $\text{cm}^{-1}$ ;  $^1\text{H}$  NMR ( $\text{CDCl}_3$ ):  $\delta$  1.32 (d,  $J = 19.3$  Hz, 9H,  $\text{C}(\text{CH}_3)_3$ ), 7.18-7.24 (m, 4H, Ar), 7.32-7.40 (m, 3H), 7.47 (dd,  $J = 1.4$  Hz, 9.0 Hz, 1H), 7.82-7.88 (m, 3H), 7.95 (d,  $J = 9.0$  Hz, 1H, Ar);  $^{13}\text{C}$  NMR ( $\text{CDCl}_3$ ):  $\delta$  26.1 ( $\text{C}(\text{CH}_3)_3$ ), 42.0 (d,  $^1J_{\text{P-C}} = 72.0$  Hz,  $\text{C}(\text{CH}_3)_3$ ), 120.9, 121.0, 122.4, 122.9, 125.7, 126.5, 126.8, 127.1, 127.5, 128.4, 128.7, 130.6, 130.7, 131.3, 132.1, 132.9, 146.8, 146.9, 150.9, 151.0 (Ar);  $^{31}\text{P}$  NMR ( $\text{CDCl}_3$ ):  $\delta$  139.5 ( $^1J_{\text{P-Se}} = 917.0$  Hz);  $^{77}\text{Se}$  NMR ( $\text{CDCl}_3$ ):  $\delta$  -283.4 ( $^1J_{\text{P-Se}} = 917.0$  Hz); MS (EI)  $m/z$  452 ( $\text{M}^+$ ); HRMS Calcd for  $\text{C}_{24}\text{H}_{21}\text{O}_2\text{PSe}$ : 452.0444, Found: 452.0421.

#### **( $S_{\text{ax}}$ )-4-(Adamantan-2-yl)binaphtho[2,1-*d*:1',2'-*f*][1,3,2]dioxaphosphepine-4-selenide (**5j**)**

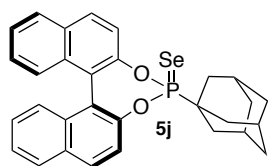

Chemical Formula:  $\text{C}_{30}\text{H}_{27}\text{O}_2\text{PSe}$   
Exact Mass: 530.09  
Molecular Weight: 529.47

The following compound was synthesized *via* Procedure A, with 2-adamantylmagnesium bromide (**2j**) (0.41 M THF solution, 8.50 ml, 3.5 mmol), toluene solution (35 mL), and ( $S_{\text{ax}}$ )-BISEPCl (1.52 g, 3.5 mmol). Purification by column chromatography on silica gel ( $\text{CH}_2\text{Cl}_2$  : hexane = 1 : 5,  $R_f = 0.23$ ) gave the corresponding ester (**5j**) (1.15 g, 63%) as a colorless solid.

mp: 282-283 °C; IR (KBr): 3064, 2909, 2849, 1590, 1507, 1462, 1323, 1223, 1071, 951, 831  $\text{cm}^{-1}$ ;  $^1\text{H}$  NMR ( $\text{CDCl}_3$ ):  $\delta$  1.70-1.75 (m, 6H, Adm), 2.00 (m, 6H Adm), 2.10-2.14 (m, 3H, Adm), 7.15 (d,  $J = 8.5$  Hz, 1H), 7.19-7.23 (m, 1H, Ar), 7.27-7.31 (m, 2H, Ar), 7.42-7.48 (m, 2H, Ar), 7.50-7.52 (m, 2H, Ar), 7.91-7.93 (m, 2H, Ar), 7.96 (d,  $J = 9.0$  Hz, 1H), 8.02 (d,  $J = 9.0$  Hz, 1H);  $^{13}\text{C}$  NMR ( $\text{CDCl}_3$ ):  $\delta$  27.4 ( $^3J_{\text{C-P}} = 12.2$  Hz), 36.1, 36.2, 44.6 ( $^1J_{\text{C-P}} = 71.4$  Hz) (Adm), 120.7, 121.0, 122.3, 122.7, 125.5, 126.2, 126.5, 126.9, 127.3, 128.2, 128.5, 130.4, 131.0, 131.9, 132.6, 146.5, 146.6, 150.8, 151.0 (Ar);  $^{31}\text{P}$  NMR ( $\text{CDCl}_3$ ):  $\delta$  136.9 ( $^1J_{\text{P-Se}} = 913.4$  Hz);  $^{77}\text{Se}$  NMR ( $\text{CDCl}_3$ ):  $\delta$  -300.0

( $^1J_{\text{P-Se}} = 913.4$  Hz); MS (EI)  $m/z$  530 ( $M^+$ ); HRMS Calcd for  $\text{C}_{30}\text{H}_{27}\text{O}_2\text{PSe}$ : 530.0914, Found: 530.0926.

#### ( $S_{\text{ax}}$ )-4-Allylbinaphtho[2,1-d:1',2'-f][1,3,2]dioxaphosphepine-4-selenide (**5k**)

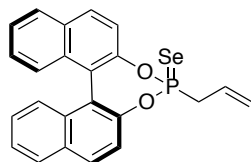

Chemical Formula:  $\text{C}_{23}\text{H}_{17}\text{O}_2\text{PSe}$   
Exact Mass: 436.01  
Molecular Weight: 435.31

The following compound was synthesized *via* Procedure A, with allylmagnesium bromide (**2k**) (0.93 M  $\text{Et}_2\text{O}$  solution, 0.54 mL, 0.5 mmol), toluene (5 mL), and ( $S_{\text{ax}}$ )-BISEPCl (215 mg, 0.5 mmol). Purification by column chromatography on silica gel ( $\text{CH}_2\text{Cl}_2$  : hexane = 1 : 3,  $R_f = 0.20$ ) gave the corresponding ester (**5k**) (85 mg, 39%) as a colorless solid.

mp: 187.1-187.5 °C; IR (KBr): 1507, 1225, 1068, 954, 856, 751, 597, 567  $\text{cm}^{-1}$ ;  $^1\text{H}$  NMR ( $\text{CDCl}_3$ )  $\delta$  3.13-3.19 (m, 2H,  $\text{PCH}_2\text{CHCH}_2$ ), 5.33-5.42 (m, 2H,  $\text{PCH}_2\text{CHCH}_2$ ), 5.92-6.04 (m, 1H,  $\text{PCH}_2\text{CHCH}_2$ ), 7.25-7.34 (m, 3H, Ar), 7.39-7.52 (m, 4H, Ar), 7.57 (dd,  $J = 1.4, 8.7$  Hz, 1H, Ar), 7.96 (d,  $J = 8.2$  Hz, 2H, Ar), 8.02 (d,  $J = 8.2$  Hz, 1H, Ar), 8.04 (d,  $J = 7.8$  Hz, 1H, Ar);  $^{13}\text{C}$  NMR ( $\text{CDCl}_3$ ):  $\delta$  40.4 (d,  $J_{\text{P-C}} = 80.8$  Hz,  $\text{PCH}_2\text{CHCH}_2$ ), 120.5, 121.8, 121.9, 122.6, 122.7, 125.7, 125.9, 126.3, 126.4, 126.6, 126.9, 127.3, 128.4, 128.6, 130.8, 130.9, 131.6, 132.0, 132.6, 132.7, 146.0, 146.1, 148.1, 148.2 (Ar);  $^{31}\text{P}$  NMR ( $\text{CDCl}_3$ ):  $\delta$  117.0 ( $^1J_{\text{P-Se}} = 930.4$  Hz);  $^{77}\text{Se}$  NMR ( $\text{CDCl}_3$ ):  $\delta$  -228.5 ( $^1J_{\text{P-Se}} = 930.4$  Hz); MS (EI)  $m/z$  436 ( $M^+$ ); HRMS Calcd for  $\text{C}_{23}\text{H}_{17}\text{O}_2\text{PSe}$ : 436.0131, Found: 436.0165.

#### ( $S_{\text{ax}}$ )-4-(4-Methoxyphenyl)binaphtho[2,1-d:1',2'-f][1,3,2]dioxaphosphepine-4-selenide (**5l**)

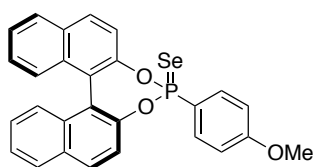

Chemical Formula:  $\text{C}_{27}\text{H}_{19}\text{O}_3\text{PSe}$   
Exact Mass: 502.02  
Molecular Weight: 501.37

The following compound was synthesized *via* Procedure B, with 4-methoxyphenylmagnesium bromide (**2l**) (0.45 M THF solution, 1.10 mL, 0.5 mmol), toluene (5 mL), DMAP (122 mg, 1.0 mmol) and ( $S_{\text{ax}}$ )-BISEPCl (215 mg, 0.5 mmol). Purification by column chromatography on silica gel ( $\text{CH}_2\text{Cl}_2$  : AcOEt : hexane = 1 : 1 : 50,  $R_f = 0.09$ ) gave the corresponding ester (**5l**) (162 mg, 65%) as a colorless solid.

mp: 112.8-122.4 °C (dec); IR (KBr): 1594, 1500, 1461, 1260, 1221, 1117, 1068, 949, 835, 750, 663, 607, 564, 519  $\text{cm}^{-1}$ ;  $^1\text{H}$  NMR ( $\text{CDCl}_3$ )  $\delta$  3.80 (s, 3H,  $\text{OCH}_3$ ), 6.80-6.82 (m, 2H, Ar), 6.91 (d,  $J = 8.7$  Hz, 1H, Ar), 7.27-7.39 (m, 3H, Ar), 7.47-7.50 (m, 3H, Ar), 7.62-7.67 (m, 3H, Ar), 7.80 (d,  $J = 8.7$  Hz, 1H, Ar), 7.91 (d,  $J = 8.2$ , 1H, Ar), 7.98 (d,  $J = 8.2$  Hz, 1H, Ar), 8.08 (d,  $J = 8.7$  Hz, 1H, Ar);  $^{13}\text{C}$  NMR ( $\text{CDCl}_3$ ):  $\delta$  55.4 (s,  $\text{OCH}_3$ ), 113.5, 113.6, 121.2, 121.9, 122.0, 122.5, 122.9, 123.2, 125.7, 125.8, 126.6, 126.7, 127.1, 127.3, 128.5, 128.6, 130.5, 130.8, 131.6, 132.0, 132.5, 132.7, 134.1, 134.2, 146.1, 146.2, 148.4, 148.6, 163.7, 163.8 (Ar);  $^{31}\text{P}$  NMR ( $\text{CDCl}_3$ ):  $\delta$  109.7 ( $^1J_{\text{P-Se}} = 938.4$  Hz);  $^{77}\text{Se}$  NMR ( $\text{CDCl}_3$ ):  $\delta$  -246.4 (d,  $^1J_{\text{P-Se}} = 938.4$  Hz); MS (EI)  $m/z$  502 ( $M^+$ ); HRMS Calcd for

C<sub>27</sub>H<sub>19</sub>O<sub>3</sub>PSe: 502.0237, Found: 502.0247.

**(S<sub>ax</sub>)-4-(4-Fluorophenyl)binaphtho[2,1-d:1',2'-f][1,3,2]dioxaphosphepine-4-selenide (5m)**

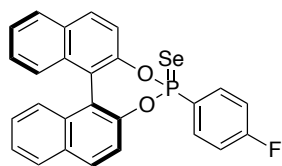

Chemical Formula: C<sub>26</sub>H<sub>16</sub>FO<sub>2</sub>PSe  
Exact Mass: 490.00  
Molecular Weight: 489.34

The following compound was synthesized *via* Procedure B, with 4-fluorophenylmagnesium bromide (**2m**) (1.92 M Et<sub>2</sub>O solution, 1.56 mL, 3.0 mmol), toluene (30 mL), DMAP (733 mg, 6.0 mmol) and (S<sub>ax</sub>)-BISEPCI (1.29 g, 3.0 mmol). Purification by column chromatography on silica gel (CH<sub>2</sub>Cl<sub>2</sub> : hexane = 1 : 3, R<sub>f</sub> = 0.15) gave the corresponding ester (**5m**) (1.01 g, 69%) as a colorless solid.

mp: 228.5-229.7 °C; IR (KBr): 3056, 1908, 1590, 1496, 1221, 1114, 951, 836, 662, 607, 512 cm<sup>-1</sup>; <sup>1</sup>H NMR (CDCl<sub>3</sub>) δ 6.88-6.89 (d, *J* = 8.59 Hz, 1H, Ar), 7.03-7.06 (m, 2H, Ar), 7.14-7.29 (m, 3H, Ar), 7.37-7.41 (m, 3H, Ar), 7.49-7.59 (m, 3H, Ar), 7.69 (d, *J* = 8.78 Hz, 1H, Ar), 7.80 (d, *J* = 8.78, 1H, Ar), 7.86 (d, *J* = 8.29 Hz, 1H, Ar), 7.99 (d, *J* = 9.27 Hz, 1H, Ar); <sup>13</sup>C NMR (CDCl<sub>3</sub>): δ 115.3, 115.5, 115.5, 115.6, 120.9, 121.8, 122.5, 122.8, 125.8, 125.9, 126.7, 126.8, 127.0, 127.2, 128.5, 128.6, 130.6, 130.9, 131.6, 132.1, 132.4, 132.6, 134.5, 134.6, 134.6, 134.7, 145.8, 145.9, 148.2, 148.3, 164.9, 167.0 (Ar); <sup>19</sup>F NMR (CDCl<sub>3</sub>): δ -103.9; <sup>31</sup>P NMR (CDCl<sub>3</sub>): δ 106.8 (<sup>1</sup>*J*<sub>P-Se</sub> = 938.7 Hz); <sup>77</sup>Se NMR (CDCl<sub>3</sub>): δ -242.0 (d, <sup>1</sup>*J*<sub>P-Se</sub> = 938.7 Hz); MS (EI) *m/z* 490 (M<sup>+</sup>); HRMS Calcd for C<sub>26</sub>H<sub>16</sub>FO<sub>2</sub>PSe: 490.0037, Found: 490.0024.

**(S<sub>ax</sub>)-4-(4-(Trifluoromethyl)phenyl)binaphtho[2,1-d:1',2'-f][1,3,2]dioxaphosphepine-4-selenide (5n)**

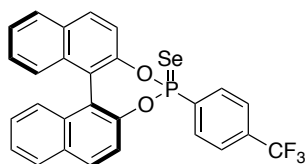

Chemical Formula: C<sub>27</sub>H<sub>16</sub>F<sub>3</sub>O<sub>2</sub>PSe  
Exact Mass: 540.00  
Molecular Weight: 539.34

The following compound was synthesized *via* Procedure A, with (4-trifluoromethyl)phenylmagnesium bromide (**2n**) (0.79 M THF solution, 2.40 ml, 2.0 mmol), toluene (20 mL), and (S<sub>ax</sub>)-BISEPCI (863.6 mg, 2.0 mmol). Purification by column chromatography on silica gel (CH<sub>2</sub>Cl<sub>2</sub> : hexane = 1 : 5, R<sub>f</sub> = 0.18) gave the corresponding ester (**5n**) (900.2 mg, 83%) as a colorless solid.

mp: 144-145 °C; IR (KBr): 3050, 1589, 1461, 1397, 1324, 1220, 1063, 950, 838, 750 cm<sup>-1</sup>; <sup>1</sup>H NMR (CDCl<sub>3</sub>): δ 6.88 (dd, *J* = 0.9 Hz, *J* = 9.0 Hz, 1H), 7.29-7.38 (m, 3H, Ar), 7.46 (d, *J* = 8.5 Hz, 1H), 7.49-7.53 (m, 2H, Ar), 7.61 (d, *J* = 8.1 Hz, 1H), 7.62 (d, *J* = 8.1 Hz, 1H), 7.66 (dd, *J* = 1.4 Hz, *J* = 9.0 Hz, 1H), 7.80 (d, *J* = 9.0 Hz, 1H), 7.85-7.93 (m, 3H, Ar), 8.00 (d, *J* = 8.1 Hz, 1H), 8.10 (d, *J* = 8.1 Hz, 1H); <sup>13</sup>C NMR (CDCl<sub>3</sub>): δ 120.7, 121.9, 122.1, 122.5, 122.9, 125.1, 125.2, 126.1, 126.9, 127.0, 127.1, 127.3, 128.7, 128.8, 130.9, 131.2, 131.8, 132.3, 132.4, 132.6, 132.7, 134.7, 135.0, 145.7, 145.8, 148.2, 148.4 (Ar); <sup>19</sup>F NMR (CDCl<sub>3</sub>): δ -63.1; <sup>31</sup>P NMR (CDCl<sub>3</sub>): δ 104.7 (<sup>1</sup>*J*<sub>P-Se</sub> = 946.5 Hz); <sup>77</sup>Se NMR (CDCl<sub>3</sub>): δ -231.7 (<sup>1</sup>*J*<sub>P-Se</sub> = 946.5 Hz); MS (EI) *m/z* 540 (M<sup>+</sup>); HRMS Calcd for C<sub>27</sub>H<sub>16</sub>F<sub>3</sub>O<sub>2</sub>PSe: 540.0005, Found: 540.0071.

**(S<sub>ax</sub>)-4-(2-Methoxyphenyl)binaphtho[2,1-d:1',2'-f][1,3,2]dioxaphosphepine-4-selenide (5o)**

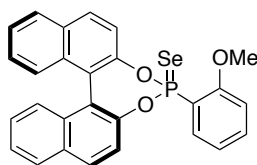

Chemical Formula: C<sub>27</sub>H<sub>19</sub>O<sub>3</sub>PSe  
Exact Mass: 502.02  
Molecular Weight: 501.37

The following compound was synthesized *via* Procedure B, with 2-methoxyphenylmagnesium bromide (**2o**) (0.90 M Et<sub>2</sub>O solution, 0.56 mL, 0.5 mmol), toluene (5 mL), DMAP (122 mg, 1.0 mmol) and (S<sub>ax</sub>)-BISEPCI (215 mg, 0.5 mmol). Purification by column chromatography on silica gel (CH<sub>2</sub>Cl<sub>2</sub> : AcOEt : hexane = 1 : 2 : 30, R<sub>f</sub> = 0.13) gave the corresponding ester (**5o**) (113 mg, 45%) as a colorless solid.

solid.

mp: 222.5-223.2 °C; IR (KBr): 1588, 1476, 1322, 1223, 1068, 1018, 953, 854, 751, 614, 564, 518, 412 cm<sup>-1</sup>; <sup>1</sup>H NMR (CDCl<sub>3</sub>) δ 3.60 (d, *J* = 1.37 Hz, 3H, OCH<sub>3</sub>), 6.75-6.83 (m, 2H, Ar), 7.07 (d, *J* = 8.70 Hz, 1H, Ar), 7.12-7.16 (m, 2H, Ar), 7.23-7.37 (m, 5H, Ar), 7.58-7.66 (m, 2H, Ar), 7.69-7.74 (m, 2H, Ar), 7.85 (d, *J* = 8.24 Hz, 1H, Ar), 7.95 (d, *J* = 8.70 Hz, 1H, Ar); <sup>13</sup>C NMR (CDCl<sub>3</sub>): δ 55.8 (OCH<sub>3</sub>), 111.7, 111.8, 119.9, 120.3, 120.4, 120.5, 120.9, 122.3, 122.4, 123.0, 125.5, 125.6, 126.3, 126.4, 127.1, 127.2, 128.2, 128.6, 130.3, 130.6, 131.5, 132.0, 132.5, 132.7, 134.0, 134.1, 134.8, 146.2, 146.3, 149.3, 149.4, 160.5 (Ar); <sup>31</sup>P NMR (CDCl<sub>3</sub>): δ 102.4 (<sup>1</sup>J<sub>P-Se</sub> = 928.2 Hz); <sup>77</sup>Se NMR (CDCl<sub>3</sub>): δ -175.4 (d, <sup>1</sup>J<sub>P-Se</sub> = 928.2 Hz); MS (EI) *m/z* 502 (M<sup>+</sup>); HRMS Calcd for C<sub>27</sub>H<sub>19</sub>O<sub>3</sub>PSe: 502.0237, Found:502.0263.

**(S<sub>ax</sub>)-4-(Naphthalen-2-yl)binaphtho[2,1-d:1',2'-f][1,3,2]dioxaphosphepine-4-selenide (5p)**

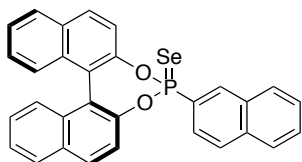

Chemical Formula: C<sub>30</sub>H<sub>19</sub>O<sub>2</sub>PSe  
Exact Mass: 522.03  
Molecular Weight: 521.40

The following compound was synthesized *via* Procedure A, with 2-naphthylmagnesium bromide (**2p**) (0.29 M THF solution, 3.45 ml, 1.0 mmol), toluene (10 mL), and (S<sub>ax</sub>)-BISEPCI (426.5 mg, 1.0 mmol). Purification by column chromatography on silica gel (CH<sub>2</sub>Cl<sub>2</sub> : hexane = 1 : 5, R<sub>f</sub> = 0.49) gave the corresponding ester (**5p**) (422.4 mg, 82%) as a colorless solid.

mp: 218-219 °C; IR (KBr): 3049, 1587, 1507, 1460, 1221, 1089, 954, 834, 747, 710, 655 cm<sup>-1</sup>; <sup>1</sup>H NMR (CDCl<sub>3</sub>): δ 6.87 (dd, *J* = 0.9 Hz, 9.0 Hz, 1H), 7.29-7.38 (m, 2H, Ar), 7.40 (d, *J* = 8.1 Hz, 1H), 7.48-7.63 (m, 6H, Ar), 7.69-7.76 (m, 3H, Ar), 7.82 (d, *J* = 8.1 Hz, 1H), 7.82-7.89 (m, 2H, Ar), 8.00 (d, *J* = 8.1 Hz, 1H), 8.11 (d, *J* = 9.0 Hz, 1H), 8.45 (m, 1H, Ar); <sup>13</sup>C NMR (CDCl<sub>3</sub>): δ 121.2, 122.1, 122.5, 123.0, 125.9, 126.7, 126.8, 127.2, 127.4, 127.9, 128.0, 128.6, 128.7, 129.0, 129.5, 130.6, 131.0, 131.7, 132.0, 132.1, 132.2, 132.6, 132.8, 134.8, 134.9, 135.4, 146.1, 146.2, 148.6, 148.7 (Ar); <sup>31</sup>P NMR (CDCl<sub>3</sub>): δ 109.1 (<sup>1</sup>J<sub>P-Se</sub> = 934.3 Hz); <sup>77</sup>Se NMR (CDCl<sub>3</sub>): δ -234.7 (<sup>1</sup>J<sub>P-Se</sub> = 934.3 Hz); MS (EI) *m/z* 522 (M<sup>+</sup>); HRMS Calcd for C<sub>30</sub>H<sub>19</sub>O<sub>2</sub>PSe: 522.0288, Found: 522.0309.

**(S<sub>ax</sub>)-4-(2-(1,3-Dioxolan-2-yl)ethyl)binaphtho[2,1-d:1',2'-f][1,3,2]dioxaphosphepine-4-selenide (5q)**

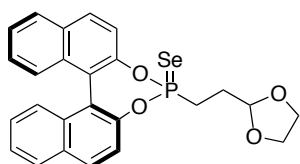

Chemical Formula: C<sub>25</sub>H<sub>21</sub>O<sub>4</sub>PSe  
 Exact Mass: 496.03  
 Molecular Weight: 495.37

The following compound was synthesized *via* Procedure A, with (2-(1,3-dioxolan-2-yl)ethyl)magnesium bromide (**2q**) (0.43 M THF solution, 7.0 ml, 3.0 mmol), toluene (10 mL), and (*S*<sub>ax</sub>)-BISEPCl (1.29 g, 3.0 mmol). Purification by column chromatography on silica gel (CH<sub>2</sub>Cl<sub>2</sub> : hexane = 2 : 1, R<sub>f</sub> = 0.25) gave the corresponding ester (**5q**) (0.95 g, 64%) as a colorless solid.

mp: 100-110 °C; IR (KBr): 2924, 1588, 1508, 1463, 1322, 1222, 1191, 1155, 1140, 1069, 1045, 976, 951, 857, 838, 813, 750, 696, 598, 567 cm<sup>-1</sup>; <sup>1</sup>H NMR (CDCl<sub>3</sub>) δ 2.18-2.45 (m, 4H), 3.84-3.96 (m, 4H), 5.03 (t, *J* = 4.0 Hz, 1H), 7.26-7.35 (m, 3H, Ar), 7.39 (d, *J* = 8.5 Hz, 1H, Ar), 7.45-7.52 (m, 3H, Ar), 7.57 (dd, *J* = 0.9, 8.5 Hz, 1H), 7.96 (d, *J* = 8.1 Hz, 2H), 8.02 (d, *J* = 9.0 Hz, 1H), 8.04 (d, *J* = 9.0 Hz, 1H); <sup>13</sup>C NMR (CDCl<sub>3</sub>): δ 27.7, 28.4 (d, <sup>2</sup>*J*<sub>C-P</sub> = 84.6 Hz), 65.3, 102.7 (d, <sup>3</sup>*J*<sub>C-P</sub> = 20.7 Hz), 120.5, 121.9, 122.6, 122.9, 125.8, 126.0, 126.7, 127.0, 127.1, 127.4, 128.6, 128.7, 130.9, 131.2, 131.8, 132.1, 132.7, 146.2 (d, *J* = 10.3 Hz), 148.3 (d, *J* = 14.1 Hz) (Ar); <sup>31</sup>P NMR (CDCl<sub>3</sub>): δ 124.6 (<sup>1</sup>*J*<sub>P-Se</sub> = 924.4 Hz); <sup>77</sup>Se NMR (CDCl<sub>3</sub>): δ -236.0 (<sup>1</sup>*J*<sub>P-Se</sub> = 924.4 Hz); MS (EI) *m/z* 496 (M<sup>+</sup>); HRMS Calcd for C<sub>25</sub>H<sub>21</sub>O<sub>4</sub>PSe: 496.0343, Found: 493.0359.

#### (*S*<sub>ax</sub>)-4-(Ethylselanyl)binaphtho[2,1-d:1',2'-f][1,3,2]dioxaphosphine-4-selenide (**6**)

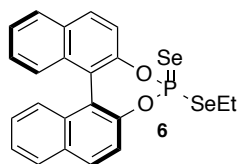

Chemical Formula: C<sub>22</sub>H<sub>17</sub>O<sub>2</sub>PSe<sub>2</sub>  
 Exact Mass: 503.93  
 Molecular Weight: 502.26

The following compound was synthesized *via* Procedure A, with ethylmagnesium bromide (**2c**) (2.5 M Et<sub>2</sub>O solution, 0.4 mL, 1.0 mmol), toluene (4 mL), and (*S*<sub>ax</sub>)-BISEPCl (431 mg, 1.0 mmol). Purification by column chromatography on silica gel (CH<sub>2</sub>Cl<sub>2</sub> : hexane = 1 : 3, R<sub>f</sub> = 0.38) gave the corresponding ester (**6**) (26 mg, 5%) as a colorless solid.

mp: 180.6-182.9 °C; IR (KBr): 2921, 2853, 1586, 1508, 1460, 1320, 1215, 1198, 1157, 1065, 975, 941, 845, 832, 810, 772, 755, 706, 696, 651, 606, 581, 563, 546, 522, 410 cm<sup>-1</sup>; <sup>1</sup>H NMR (CDCl<sub>3</sub>) δ 1.62 (d, *J* = 7.3 Hz, 3H, CH<sub>2</sub>CH<sub>3</sub>), 3.04-3.27 (m, 2H, CH<sub>2</sub>), 7.27-7.33 (m, 2H), 7.38 (d, *J* = 8.7 Hz, 1H), 7.43 (d, *J* = 8.7 Hz, 1H), 7.47-7.52 (m, 3H), 7.61 (dd, *J* = 1.4, 9.2 Hz, 1H), 7.96 (d, *J* = 8.2 Hz, 2H), 8.02 (d, *J* = 8.2 Hz, 1H), 8.04 (d, *J* = 8.7 Hz, 1H); <sup>13</sup>C NMR (CDCl<sub>3</sub>): δ 16.6 (d, *J* = 5.6 Hz), 28.1, 121.4, 121.7, 122.7 (d, *J* = 2.8 Hz), 122.9 (d, *J* = 3.8 Hz, 1H), 125.8, 125.9, 126.6, 126.7, 127.0, 127.2, 128.5, 128.6, 130.5, 130.8, 131.8, 132.0, 132.5, 147.0 (d, *J* = 13.2 Hz), 148.2 (d, *J* = 16.0 Hz, Ar); <sup>31</sup>P NMR (CDCl<sub>3</sub>): δ 104.5 (<sup>1</sup>*J*<sub>P-Se</sub> = 517.1, 952.2 Hz); <sup>77</sup>Se NMR (CDCl<sub>3</sub>): δ -60.8 (<sup>1</sup>*J*<sub>P-Se</sub> = 952.2 Hz), 375.5 (<sup>1</sup>*J*<sub>P-Se</sub> = 517.1 Hz); MS (EI) *m/z* 504 (M<sup>+</sup>); HRMS Calcd for C<sub>22</sub>H<sub>17</sub>O<sub>2</sub>PSe<sub>2</sub>: 503.9297, Found: 503.9315.

#### (*S*<sub>ax</sub>)-4-(*sec*-Butyl)binaphtho[2,1-d:1',2'-f][1,3,2]dioxaphosphine-4-selenide (**7**)



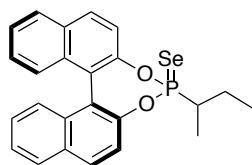

Chemical Formula:  $C_{24}H_{21}O_2PSe$   
 Exact Mass: 452.04  
 Molecular Weight: 451.36

The following compound was synthesized *via* Procedure B, with *sec*-Butylmagnesium bromide (**2r**) (0.56 M THF solution, 18 mL, 10 mmol), toluene (100 mL), DMAP (2.44 g, 20 mmol) and ( $S_{ax}$ )-BISEPCI (4.29 g, 10 mmol). Purification by column chromatography on silica gel ( $CH_2Cl_2$  : hexane = 1 : 3,  $R_f$  = 0.28) gave the corresponding ester (**7**) (3.22 g, 71%, dr = 50 : 50) as a colorless solid. The diastereoisomers

were separated by recrystallization from  $CH_2Cl_2$  and AcOEt.

(dr = 83 : 17): IR (KBr): 2970, 1588, 1506, 1461, 1320, 1218, 1069, 950, 913, 734, 600, 503  $cm^{-1}$ ;  $^1H$  NMR ( $CDCl_3$ ):  $\delta$  0.97 (t,  $J$  = 7.6 Hz, 0.5H,  $CH_2CH_3$ ), 1.10 (t,  $J$  = 7.6 Hz, 2.5H,  $CH_2CH_3$ ), 1.26 (dd,  $J$  = 22.9, 6.7 Hz, 2.5H,  $PCHCH_3$ ), 1.40 (dd,  $J$  = 22.9, 6.7 Hz, 0.5 H,  $PCHCH_3$ ), 1.54-1.67 (m, 1H), 1.90-2.00 (m, 0.2H), 2.08-2.20 (m, 1.8H), 7.21-7.30 (m, 3H, Ar), 7.37-7.48 (m, 4H, Ar), 7.57 (m, 1H, Ar), 7.92 (d,  $J$  = 8.5 Hz, 2H, Ar), 7.97-8.03 (m, 2H, Ar);  $^{13}C$  NMR ( $CDCl_3$ ):  $\delta$  11.2 (d,  $^2J_{C-P}$  = 16.0 Hz), 11.5 (d,  $^2J_{C-P}$  = 16.9 Hz), 13.0, 13.1, 23.6, 38.3 (d,  $^1J_{C-P}$  = 77.1 Hz,  $PCH$ ), 38.4 (d,  $^1J_{C-P}$  = 77.1 Hz,  $PCH(CH_3)CH_2CH_3$ ), 120.0, 120.1 (d,  $J_{C-P}$  = 2.8 Hz), 122.0 (d,  $J_{C-P}$  = 2.8 Hz), 122.3, 122.4 (d,  $J_{C-P}$  = 2.8 Hz), 122.6 (d,  $J_{C-P}$  = 2.8 Hz), 125.5, 125.7, 126.4, 126.8 (d,  $J_{C-P}$  = 2.8 Hz), 127.2, 128.3, 128.5, 130.6, 130.8, 131.4, 131.8, 132.5, 132.6, 146.1 (d,  $J_{C-P}$  = 10.3 Hz), 146.3, 148.3 (d,  $J_{C-P}$  = 14.1 Hz) (Ar);  $^{31}P$  NMR ( $CDCl_3$ ):  $\delta$  135.1 ( $^1J_{P-Se}$  = 920.3 Hz), 135.6 ( $^1J_{P-Se}$  = 920.3 Hz);  $^{77}Se$  NMR ( $CDCl_3$ ):  $\delta$  -297.5 ( $^1J_{P-Se}$  = 920.3 Hz), -299.2 ( $^1J_{P-Se}$  = 920.3 Hz); MS (EI)  $m/z$  452 ( $M^+$ ); HRMS Calcd for  $C_{24}H_{21}O_2PSe$ : 452.0444, Found: 452.0442.

**( $S_{ax},S$ )-4-(*sec*-Butyl)binaphtho[2,1-d:1',2'-f][1,3,2]dioxaphosphepine-4-selenide (**7a**)**

(dr = >99 : 1): mp: 202.0-202.6  $^{\circ}C$ ; IR (KBr): 2925, 1588, 1462, 1320, 1226, 1071, 950, 836, 742, 560, 503  $cm^{-1}$ ;  $^1H$  NMR ( $CDCl_3$ ):  $\delta$  1.11 (t,  $J$  = 7.3 Hz, 3H,  $CH_2CH_3$ ), 1.26 (dd,  $J$  = 22.0, 6.9 Hz, 3H,  $PCHCH_3$ ), 1.59-1.67 (m, 1H,  $PCHCH_3$ ), 2.09-2.21 (m, 2H,  $CH_2CH_3$ ), 7.23-7.31 (m, 3H, Ar), 7.37-7.49 (m, 4H, Ar), 7.57 (dd,  $J$  = 8.7, 1.4 Hz, 1H, Ar), 7.94 (d,  $J$  = 8.2 Hz, 2H, Ar), 8.01 (m, 2H, Ar);  $^{13}C$  NMR ( $CDCl_3$ ):  $\delta$  11.5 (d,  $^2J_{C-P}$  = 17.3 Hz,  $PCH(CH_3)$ ), 13.1, 23.7, 38.4 (d,  $^1J_{C-P}$  = 76.7 Hz,  $PCH$ ), 120.2, 122.0, 122.5, 122.7, 125.6, 125.8, 126.5, 126.8, 126.9, 127.2, 128.3, 128.5, 130.6, 130.8, 131.5, 131.9, 132.6, 132.7, 146.2 (d,  $J_{C-P}$  = 9.6 Hz), 148.4 (d,  $J_{C-P}$  = 13.4 Hz) (Ar);  $^{31}P$  NMR ( $CDCl_3$ ):  $\delta$  135.1 ( $^1J_{P-Se}$  = 922.9 Hz);  $^{77}Se$  NMR ( $CDCl_3$ ):  $\delta$  -299.1 ( $^1J_{P-Se}$  = 922.9 Hz); MS (EI)  $m/z$  452 ( $M^+$ ); HRMS Calcd for  $C_{24}H_{21}O_2PSe$ : 452.0444, Found: 452.0442.

**( $S_{ax}$ )-4-(Decan-2-yl)binaphtho[2,1-d:1',2'-f][1,3,2]dioxaphosphepine-4-selenide (**8**)**

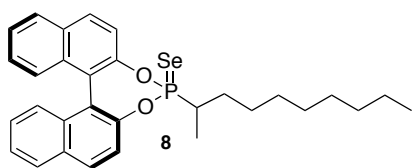

Chemical Formula:  $C_{30}H_{33}O_2PSe$   
 Exact Mass: 536.14  
 Molecular Weight: 535.52

The following compound was synthesized *via* Procedure A, with methylmagnesium bromide (**2s**) (0.09 M THF solution, 5.8 mL, 0.5 mmol), toluene solution (5 mL), and ( $S_{ax}$ )-BISEPCI (215 mg, 0.5 mmol). Purification by column chromatography on silica gel (AcOEt : hexane = 1 : 25,  $R_f$  = 0.48) gave three fractions (first:

28%, (dr = 0: 100), second: 7% (dr = 30: 70), third: 24% (dr = 100: 0)) the corresponding ester (**8**) as a colorless solid.

**(8a)** (dr = 0: 100): mp: 143.6-144.5 °C; IR (KBr): 3055, 2928, 2851, 1588, 1224, 1198, 840, 812, 601, 565 cm<sup>-1</sup>; <sup>1</sup>H NMR (CDCl<sub>3</sub>) δ 0.92 (t, *J* = 6.3 Hz, 3H, PCH(CH<sub>3</sub>)(CH<sub>2</sub>)<sub>7</sub>CH<sub>3</sub>), 1.26 (dd, *J* = 6.9, 22.3 Hz, 3H, PCH(CH<sub>3</sub>)(CH<sub>2</sub>)<sub>7</sub>CH<sub>3</sub>), 1.31-1.37 (m, 11H), 1.56-1.64 (m, 2H), 2.01-2.07 (m, 1H), 2.20-2.27 (m, 1H, PCH), 7.27-7.32 (m, 3H, Ar), 7.38-7.41 (m, 2H, Ar), 7.45-7.50 (m, 2H, Ar), 7.57 (d, *J* = 8.6 Hz, 1H, Ar), 7.95 (d, *J* = 8.0 Hz, 2H, Ar), 7.99-8.02 (m, 2H, Ar); <sup>13</sup>C NMR (CDCl<sub>3</sub>): δ 13.8 (d, *J* = 90.0 Hz), 22.7, 26.6, 26.7, 29.3, 29.5, 29.6, 30.2, 31.9, 36.8 (d, *J* = 76.8 Hz), 120.3, 122.0, 122.5, 122.7, 125.6, 125.8, 126.5, 126.8, 126.9, 127.3, 128.3, 128.6, 130.6, 130.7, 131.5, 131.9, 132.6, 132.7, 146.3 (d, *J* = 10.8 Hz), 148.5 (d, *J* = 14.4 Hz) (Ar); <sup>31</sup>P NMR (CDCl<sub>3</sub>): δ 135.5 (<sup>1</sup>*J*<sub>P-Se</sub> = 920.3 Hz); <sup>77</sup>Se NMR (CDCl<sub>3</sub>): δ -299.9 (d, <sup>1</sup>*J*<sub>P-Se</sub> = 920.3 Hz); MS (EI) *m/z* 536 (M<sup>+</sup>); HRMS Calcd for C<sub>30</sub>H<sub>33</sub>O<sub>2</sub>PSe: 536.1383, Found: 536.1383.

**(8b)** (dr = 100: 0): mp: 44.4-53.0 °C; IR (KBr): 3055, 2927, 2852, 1588, 1225, 1198, 841, 812, 601, 565 cm<sup>-1</sup>; <sup>1</sup>H NMR (CDCl<sub>3</sub>) δ 0.84 (t, *J* = 6.9 Hz, 3H, PCH(CH<sub>3</sub>)(CH<sub>2</sub>)<sub>7</sub>CH<sub>3</sub>), 1.2-1.28 (m, 11H), 1.40 (dd, *J* = 6.9, 23.5 Hz, 3H, PCH(CH<sub>3</sub>)), 1.46-1.58 (m, 2H), 1.83-1.90 (m, 1H), 2.19-2.26 (m, 1H, PCH), 7.27-7.33 (m, 3H, Ar), 7.40 (d, *J* = 8.6 Hz, 1H, Ar), 7.42 (d, *J* = 8.6 Hz, 1H, Ar), 7.45-7.51 (m, 2H, Ar), 7.58 (dd, *J* = 1.2, 8.6 Hz, 1H, Ar), 7.95 (d, *J* = 8.0 Hz, 2H, Ar), 7.99-8.05 (m, 2H, Ar); <sup>13</sup>C NMR (CDCl<sub>3</sub>): δ 13.7 (d, *J* = 78.0 Hz), 22.6, 26.7, 26.8, 29.1, 29.3, 29.5, 30.4, 31.8, 37.0 (d, *J* = 76.8 Hz), 120.1, 122, 122.4, 122.8, 125.6, 125.8, 126.5, 126.8, 126.9, 127.3, 128.4, 128.6, 130.6, 130.9, 131.5, 131.9, 132.6, 132.7, 146.4 (d, *J* = 10.8 Hz), 148.5 (d, *J* = 13.2 Hz); <sup>31</sup>P NMR (CDCl<sub>3</sub>): δ 135.8 (<sup>1</sup>*J*<sub>P-Se</sub> = 920.3 Hz); <sup>77</sup>Se NMR (CDCl<sub>3</sub>): δ -298.4 (d, <sup>1</sup>*J*<sub>P-Se</sub> = 920.3 Hz); MS (EI) *m/z* 536 (M<sup>+</sup>); HRMS Calcd for C<sub>30</sub>H<sub>33</sub>O<sub>2</sub>PSe: 536.1383, Found: 536.1363.

#### **(S<sub>ax</sub>)-4-(2-Ethylhexyl)binaphtho[2,1-d:1',2'-f][1,3,2]dioxaphosphine-4-selenide (9)**

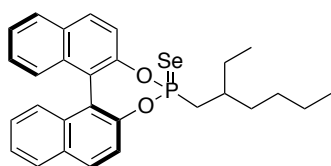

Chemical Formula: C<sub>28</sub>H<sub>29</sub>O<sub>2</sub>PSe  
Exact Mass: 508.11  
Molecular Weight: 507.46

The following compound was synthesized *via* Procedure B. with 2-ethylhexylmagnesium bromide (**2t**) (0.92 M Et<sub>2</sub>O solution, 0.55 mL, 0.5 mmol), toluene (5.0 mL), DMAP (122 mg, 2 mmol), (S<sub>ax</sub>)-BISEPCI (215 mg, 0.5 mmol). Purification by column chromatography on silica gel (DCM : hexane = 1 : 3) gave the corresponding ester (183 mg, 72%, dr = 50 : 50) as a colorless solid. The diastereoisomers were separated

by recrystallization from CH<sub>2</sub>Cl<sub>2</sub> and isopropyl alcohol.

(dr = 56 : 44): IR (KBr): 2927, 1588, 1508, 1462, 1322, 1223, 1070, 954, 839, 696, 600, 565 cm<sup>-1</sup>; <sup>1</sup>H NMR (CDCl<sub>3</sub>): δ 0.84 (t, *J* = 7.3 Hz, 1.5H), 0.85 (t, *J* = 6.9 Hz, 1.5H), 0.93 (t, *J* = 6.9 Hz, 1.5H), 0.96 (t, *J* = 7.3 Hz, 1.5H), 1.17-1.39 (m, 4H), 1.43-1.74 (m, 4H), 2.14-2.27 (m, 3H), 7.27-7.34 (m, 3H, Ar), 7.39-7.52 (m, 4H, Ar), 7.55-7.58 (m, 1H, Ar), 7.96 (d, *J* = 8.2 Hz, 2H, Ar), 8.01 (d, *J* = 8.2 Hz, 1H, Ar), 8.04 (d, *J* = 8.2 Hz, 1H, Ar); <sup>13</sup>C NMR (CDCl<sub>3</sub>): δ 10.2, 10.8, 14.0, 14.1, 22.7, 22.8,

26.1 (d,  $J = 11.5$  Hz), 26.7 (d,  $J = 11.5$  Hz), 28.1, 28.6, 32.7 (d,  $J = 11.5$  Hz), 33.3 (d,  $J = 9.6$  Hz), 35.0, 35.2, 38.2 (d,  $J = 76.7$  Hz), 120.6, 122.0, 122.6, 122.8, 125.6, 125.8, 126.5, 126.8, 126.9, 127.3, 128.4, 128.6, 130.6, 130.8, 131.6, 131.9, 132.6, 132.7, 146.2, 146.3, 148.2, 148.3 (Ar);  $^{31}\text{P}$  NMR ( $\text{CDCl}_3$ ):  $\delta$  127.6 ( $^1J_{\text{P-Se}} = 920.3$  Hz), 127.7 ( $^1J_{\text{P-Se}} = 920.3$  Hz);  $^{77}\text{Se}$  NMR ( $\text{CDCl}_3$ ):  $\delta$  -225.2 (d,  $^1J_{\text{P-Se}} = 920.3$  Hz) Only one signal was observed for two diastereoisomers; MS (EI)  $m/z$  508 ( $\text{M}^+$ ); HRMS Calcd for  $\text{C}_{24}\text{H}_{21}\text{O}_2\text{PSe}$ : 508.1070, Found: 508.1066.

(dr = 92 : 8): mp: 138.0-138.8 °C; IR (KBr): 2926, 1587, 1507, 1462, 1322, 1224, 1070, 953, 813, 696, 599, 565  $\text{cm}^{-1}$ ;  $^1\text{H}$  NMR ( $\text{CDCl}_3$ ):  $\delta$  0.83 (t,  $J = 7.3$  Hz, 3H,  $\text{CH}_2\text{CH}_3$ ), 0.93 (t,  $J = 6.9$  Hz, 3H,  $\text{CH}_2\text{CH}_3$ ), 1.27-1.40 (m, 4H), 1.41-1.67 (m, 4H), 2.16-2.27 (m, 3H), 7.24-7.33 (m, 3H, Ar), 7.39-7.51 (m, 4H, Ar), 7.57 (dd,  $J = 1.4, 8.7$  Hz, 1H, Ar), 7.96 (d,  $J = 8.2$  Hz, 2H), 8.01 (d,  $J = 7.8$  Hz, 1H), 8.03 (d,  $J = 8.2$  Hz, 1H);  $^{13}\text{C}$  NMR ( $\text{CDCl}_3$ ):  $\delta$  10.2, 14.1, 22.8, 26.1 (d,  $J_{\text{C-P}} = 9.6$  Hz), 28.6, 33.3 (d,  $J_{\text{C-P}} = 11.5$  Hz), 35.0, 38.2 (d,  $^1J_{\text{C-P}} = 76.7$  Hz,  $\text{PCH}_2$ ), 120.6, 122.0, 122.6, 122.8, 125.6, 125.8, 126.5, 126.8, 126.9, 127.3, 128.4, 128.5, 130.6, 130.8, 131.5, 131.9, 132.6, 146.2 (d,  $J_{\text{C-P}} = 9.6$  Hz), 148.2 (d,  $J_{\text{C-P}} = 13.4$  Hz) (Ar);  $^{31}\text{P}$  NMR ( $\text{CDCl}_3$ ):  $\delta$  127.6 ( $^1J_{\text{P-Se}} = 919.2$  Hz);  $^{77}\text{Se}$  NMR ( $\text{CDCl}_3$ ):  $\delta$  -226.0 (d,  $^1J_{\text{P-Se}} = 919.2$  Hz); MS (EI)  $m/z$  508 ( $\text{M}^+$ ); HRMS Calcd for  $\text{C}_{24}\text{H}_{21}\text{O}_2\text{PSe}$ : 508.1070, Found: 508.1066.

#### ( $S_{\text{ax}}$ )-4-(Adamantan-2-yl)binaphtho[2,1-*d*:1',2'-*f*][1,3,2]dioxaphosphepine (10)

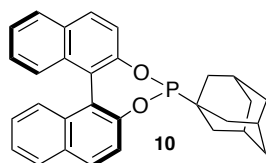

Chemical Formula:  $\text{C}_{30}\text{H}_{27}\text{O}_2\text{P}$   
Exact Mass: 450.17  
Molecular Weight: 450.51

To the solution of **5j** (161.9 mg, 0.3 mmol) in THF (1.0 mL) was added tri(*n*-butyl)phosphine (0.15 mL, 0.6 mmol), and the resulting solution was stirred at room temperature for 1 h. The precipitate was filtered and washed with hexane ( $4 \times 5$  mL). The corresponding phosphonite (**10**) (92.5 mg, 70%) was isolated as a colorless solid after drying under reduced pressure.

mp: 275-278 °C; IR (KBr): 3059, 2901, 2845, 1590, 1504, 1463, 1230, 1071, 953, 818, 753  $\text{cm}^{-1}$ ;  $^1\text{H}$  NMR ( $\text{CDCl}_3$ ):  $\delta$  1.71 (m, 8H, Adm), 1.85-1.88 (m, 4H, Adm), 1.95 (m, 3H, Adm), 7.20 (m, 3H, Ar), 7.27-7.29 (m, 1H, Ar), 7.38-7.42 (m, 2H, Ar), 7.47-7.59 (m, 2H, Ar), 7.89-7.92 (m, 3H, Ar), 7.97-7.99 (m, 1H, Ar);  $^{13}\text{C}$  NMR ( $\text{CDCl}_3$ ):  $\delta$  27.7 ( $^3J_{\text{C-P}} = 8.5$  Hz), 35.1 ( $^2J_{\text{C-P}} = 14.1$  Hz) 40.9 ( $^1J_{\text{C-P}} = 35.7$  Hz) (Adm), 121.7, 122.8, 124.7, 125.0, 126.2, 126.3, 127.1, 127.3, 128.3, 128.5, 129.6, 130.7, 130.9, 131.6, 133.1, 133.2, 151.1, 151.1, 151.6, 151.7 (Ar);  $^{31}\text{P}$  NMR ( $\text{CDCl}_3$ ):  $\delta$  203.6; MS (EI)  $m/z$  450 ( $\text{M}^+$ ); HRMS Calcd for  $\text{C}_{30}\text{H}_{27}\text{O}_2\text{P}$ : 450.1749, Found: 450.1720.

#### ( $S_{\text{ax}}$ )-4-(*sec*-Butyl)binaphtho[2,1-*d*:1',2'-*f*][1,3,2]dioxaphosphepineborane (11)

To a 20 mL two-necked flask were added selenophosphonate (**7**) (451 mg, 1.0 mmol, dr = 59 : 41), THF (5.0 mL), tri(*n*-butyl)phosphine (0.26 mL, 1.5 mmol) under Ar atmosphere. The reaction mixture was stirred for 22.5 h. After that,  $\text{BH}_3 \cdot \text{THF}$  (1M, 2.0 mL) was added to the mixture, and it

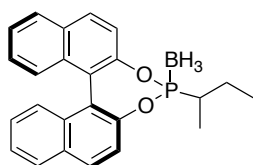

Chemical Formula:  $C_{24}H_{24}BO_2P$   
 Exact Mass: 386.16  
 Molecular Weight: 386.23

was further stirred for 2.3 h. The resulting solution was concentrated. Purification by silica gel column chromatography (acetone : hexane = 4 : 5,  $R_f = 0.25$ ) gave **(11)** (200 mg, 52%) containing selenophosphonate and tri(*n*-butyl)phosphine selenide as a white solid. The solid was purified by GPC. The resulting solid (188 mg, 0.49 mmol) was dissolved in  $CH_2Cl_2$  (2.0 mL). To this solution was added hydrogen peroxide (35% aqueous

solution, 36  $\mu$ L, 1.46 mmol), and stirred for 3 h. After that, the mixture was filtered, washed with  $CH_2Cl_2$ , and the filtrate was concentrated. The resulting solid was passed through column chromatography on silica gel (acetone : hexane = 1 : 30,  $R_f = 0.15$ ) to give the corresponding ester (91 mg, 48%, dr = 59 : 41) as a colorless solid.

(dr = 59 : 41): IR (KBr): 2969, 2387, 1589, 1507, 1462, 1322, 1230, 1072, 954, 861, 562, 526, 464, 417  $cm^{-1}$ ;  $^1H$  NMR ( $CDCl_3$ ):  $\delta$  0.14-0.87 (br, 3H,  $BH_3$ ), 0.97 (t,  $J = 7.5$  Hz, 1.9H,  $CH_2CH_3$ ), 1.08 (t,  $J = 7.5$  Hz, 1.1H,  $CH_2CH_3$ ), 1.26 (dd,  $J = 7.5, 17.2$  Hz, 1.1H,  $PCHCH_3$ ), 1.36 (dd,  $J = 7.5, 18.3$  Hz, 1.9H,  $PCHCH_3$ ), 1.51-1.63 (m, 1H,  $PCHCH_3$ ), 1.84-1.96 (m, 1.6H), 2.01-2.11 (m, 0.4H), 7.24-7.26 (m, 2H, Ar), 7.28-7.31 (m, 1H, Ar), 7.35 (d,  $J = 8.6$  Hz, 1H, Ar), 7.39-7.49 (m, 3H, Ar), 7.53 (d,  $J = 8.6$  Hz, 1H), 7.94 (d,  $J = 8.6$  Hz, 2H, Ar), 7.98-8.03 (m, 2H, Ar);  $^{13}C$  NMR ( $CDCl_3$ ):  $\delta$  11.7, 11.8, 11.8, 11.9, 12.0, 22.4 (d,  $J_{C-P} = 6.0$  Hz), 22.5 (d,  $J_{C-P} = 3.6$  Hz), 34.2 (d,  $J_{C-P} = 33.6$  Hz), 34.3 (d,  $J_{C-P} = 33.6$  Hz), 120.4, 121.7, 122.3, 122.7, 122.8, 125.5, 125.7, 126.9, 127.2, 128.4, 128.5, 130.7, 130.8, 131.5, 131.9, 132.5, 132.7, 147.3, 147.4, 147.5 (Ar);  $^{31}P$  NMR ( $CDCl_3$ ):  $\delta$  183.6 (br), 184.1 (br); MS (EI)  $m/z$  386 ( $M^+$ ); HRMS Calcd for  $C_{24}H_{24}BO_2P$ : 386.1607, Found: 386.1584.

#### **(S<sub>ax</sub>)-4-(sec-Butyl)binaphtho[2,1-d:1',2'-f][1,3,2]dioxaphosphepine-4-oxide**

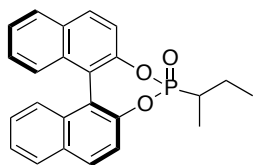

Chemical Formula:  $C_{24}H_{21}O_3P$   
 Exact Mass: 388.12  
 Molecular Weight: 388.40

(dr = 47 : 53): IR (KBr): 2970, 1590, 1507, 1464, 1229, 1072, 964, 873, 751, 656, 566, 480  $cm^{-1}$ ;  $^1H$  NMR ( $CDCl_3$ ):  $\delta$  1.03 (t,  $J = 7.3$  Hz, 1.5H,  $CH_2CH_3$ ), 1.12 (t,  $J = 7.3$  Hz, 1.5H,  $CH_2CH_3$ ), 1.31 (dd,  $J = 19.7, 7.3$  Hz, 1.5H,  $PCHCH_3$ ), 1.42 (dd,  $J = 19.7, 7.3$  Hz, 1.5H,  $PCHCH_3$ ), 1.61-1.72 (m, 1H,  $PCHCH_3$ ), 1.90-2.17 (m, 2H), 7.25-7.33 (m, 3H, Ar), 7.37-7.39 (m, 1H, Ar), 7.43-7.51 (m, 3H), 7.57 (m, 1H, Ar), 7.94-7.97 (m, 2H, Ar), 8.0-8.04

(m, 2H, Ar);  $^{13}C$  NMR ( $CDCl_3$ ):  $\delta$  11.6 (d,  $^2J_{C-P} = 14.4$  Hz,  $PCH(CH_3)$ ), 12.0 (d,  $^2J_{C-P} = 14.4$  Hz,  $PCH(CH_3)$ ), 12.3 (d,  $^2J_{C-P} = 4.8$  Hz), 12.6 (d,  $^2J_{C-P} = 4.8$  Hz), 22.9 (d,  $^2J_{C-P} = 4.8$  Hz), 23.1 (d,  $^2J_{C-P} = 2.4$  Hz), 30.3 (d,  $^1J_{C-P} = 38.4$  Hz,  $PCH$ ), 31.3 (d,  $^1J_{C-P} = 38.4$  Hz,  $PCH$ ), 119.9, 120.0, 120.1, 120.1, 121.3, 121.7, 121.7, 121.8, 125.6, 125.7, 126.6, 126.8, 126.9, 127.3, 128.3, 128.5, 130.9, 131.0, 131.2, 131.4, 131.8, 132.4, 132.6, 145.9 (d,  $J = 6.0$  Hz), 146.0 (d,  $J = 4.8$  Hz), 147.9 (d,  $J = 9.6$  Hz), 148.0 (d,  $J = 10.8$  Hz, Ar);  $^{31}P$  NMR ( $CDCl_3$ ):  $\delta$  46.6, 46.7; MS (EI)  $m/z$  388 ( $M^+$ ); HRMS Calcd for  $C_{24}H_{21}O_3P$ : 388.1228, Found: 388.1210.

## X-ray structure analysis

Crystal samples were cut from the grown crystals and mounted on a glass fiber. The crystals were coated with an epoxy resin because they were air sensitive. Measurements were carried out on a Rigaku/MSM Mercury CCD using a graphite-monochromator with Mo K $\alpha$  radiation ( $\lambda = 0.71069$  Å). The structure was solved by direct methods (SIR97)<sup>S2)</sup> and refined by full-matrix least-squares procedures (SHELXL-97)<sup>S3)</sup> using the Yadokari-XG 2009.<sup>S4)</sup> The crystal data are shown in Tables S5.

**Table S5.** Crystal Data and Structure Refinement for  $S_{ax}, S-7a$

|                                      |                                                               |
|--------------------------------------|---------------------------------------------------------------|
| Empirical formula                    | C <sub>24</sub> H <sub>21</sub> O <sub>2</sub> PSe            |
| Formula weight                       | 451.34                                                        |
| Temperature                          | 0(2) K                                                        |
| Wavelength                           | 0.71073 Å                                                     |
| Crystal system                       | Orthorhombic                                                  |
| Space group                          | $P2_12_12_1$                                                  |
| Unit cell dimensions                 | $a = 7.4584(3)$ Å<br>$b = 8.9425(4)$ Å<br>$c = 31.2167(13)$ Å |
| Volume                               | 2082.05(15) Å <sup>3</sup>                                    |
| Z                                    | 4                                                             |
| Density (calculated)                 | 1.440 g/cm <sup>-3</sup>                                      |
| Crystal size                         | 0.20 x 0.20 x 0.10 mm <sup>3</sup>                            |
| Reflections collected                | 58681                                                         |
| Independent reflections              | 4756                                                          |
| Flack parameter                      | 0.100(7)                                                      |
| Goodness-of-fit on F <sup>2</sup>    | 1.136                                                         |
| Final R indices [ $I > 2\sigma(I)$ ] | $R_1 = 0.0248$ , $wR_2 = 0.0661$                              |
| R indices (all data)                 | $R_1 = 0.0255$ , $wR_2 = 0.0664$                              |

## References

S1 T. Murai, Y. Maekawa, M. Monzaki, T. Ando and T. Maruyama, *Chem. Commun.*, 2013, **49**, 9675.

S2 A. Altomare, M. C. Burla, M. Camalli, G. L. Casciarano, C. Giacovazzo, A. Guagliardi, A. G. G. Moliterni, G. Polidori and R. Spagna, *J. Appl. Cryst.*, **1999**, 32, 115.

S3 G. M. Sheldrick, SHELXL-97, *A Program for the Refinement of Crystal Structures*; University of Göttingen: Göttingen, Germany, **1997**.

S4 (a) K. Wakita, Yadokari-XG, *Software for Crystal Structure Analyses*, **2001**. (b) C. Kabuto, S. Akine, T. Nemoto and E. Kwon, *J. Cryst. Soc. Jpn.*, **2009**, 51, 218.

Complete list for Gaussian 09, Revision D.01; M. J. Frisch, G. W. Trucks, H. B. Schlegel, G. E. Scuseria, M. A. Robb, J. R. Cheeseman, J. A. Montgomery, Jr., T. Vreven, K. N. Kudin, J. C. Burant, J. M. Millam, S. S. Iyengar, J. Tomasi, V. Barone, B. Mennucci, M.; Cossi, G. Scalmani, Rega, G. A. Petersson, H. Nakatsuji, M. Hada, M. Ehara, K. Toyota, R. Fukuda, J. Hasegawa, M. Ishida, T. Nakajima, Y. Honda, O. Kitao, H. Nakai, M. Klene, X. Li, J. E. Knox, H. P. Hratchian, J. B. Cross, V. Bakken, C. Adamo, J. Jaramillo, R. Gomperts, R. E. Stratmann, O. Yazyev, A. J. Austin, R. Cammi, C. Pomelli, J. W. Ochterski, P. Y. Ayala, K. Morokuma, G. A. Voth, P. Salvador, J. J. Dannenberg, V. G. Zakrzewski, S. Dapprich, A. D. Daniels, M. C. Strain, O. Farkas, D. K. Malick, A. D. Rabuck, K. Raghavachari, J. B. Foresman, J. V.; Ortiz, Q. Cui, A. G. Baboul, S. Clifford, J. Cioslowski, B. B. Stefanov, G. Liu, A. Liashenko, P. Piskorz, I. Komaromi, R. L. Martin, D. J. Fox, T. Keith, M. A. Al-Laham, C. Y. Peng, A. Nanayakkara, M. Challacombe, P. M. W. Gill, B. Johnson, W. Chen, M. W. Wong, C. Gonzalez and J. A. Pople, Gaussian, Inc., Wallingford CT, 2009.

YH 147 column 3-6 1H-2.jdf

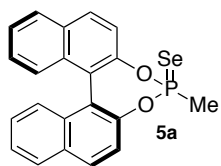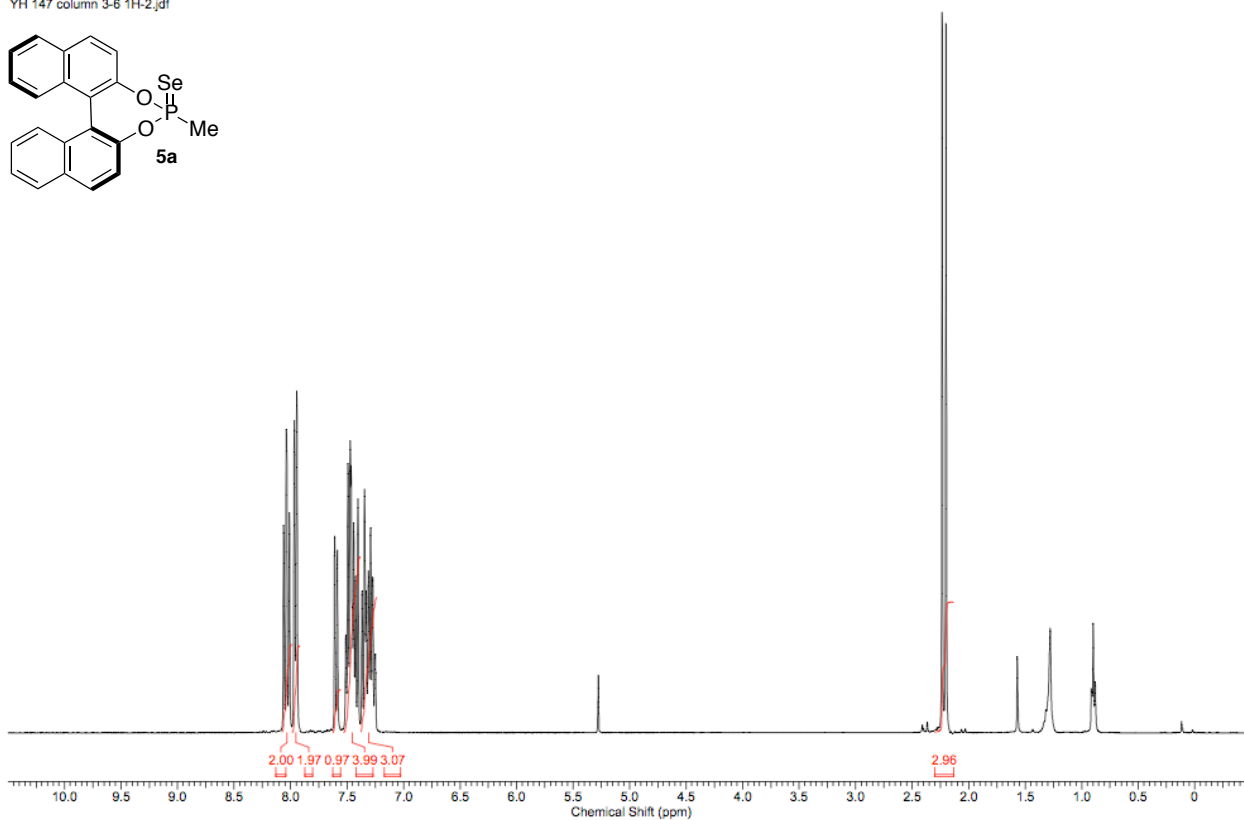

YH BISEP-Me 13C-1.jdf

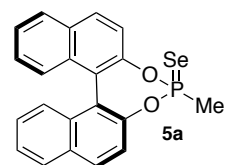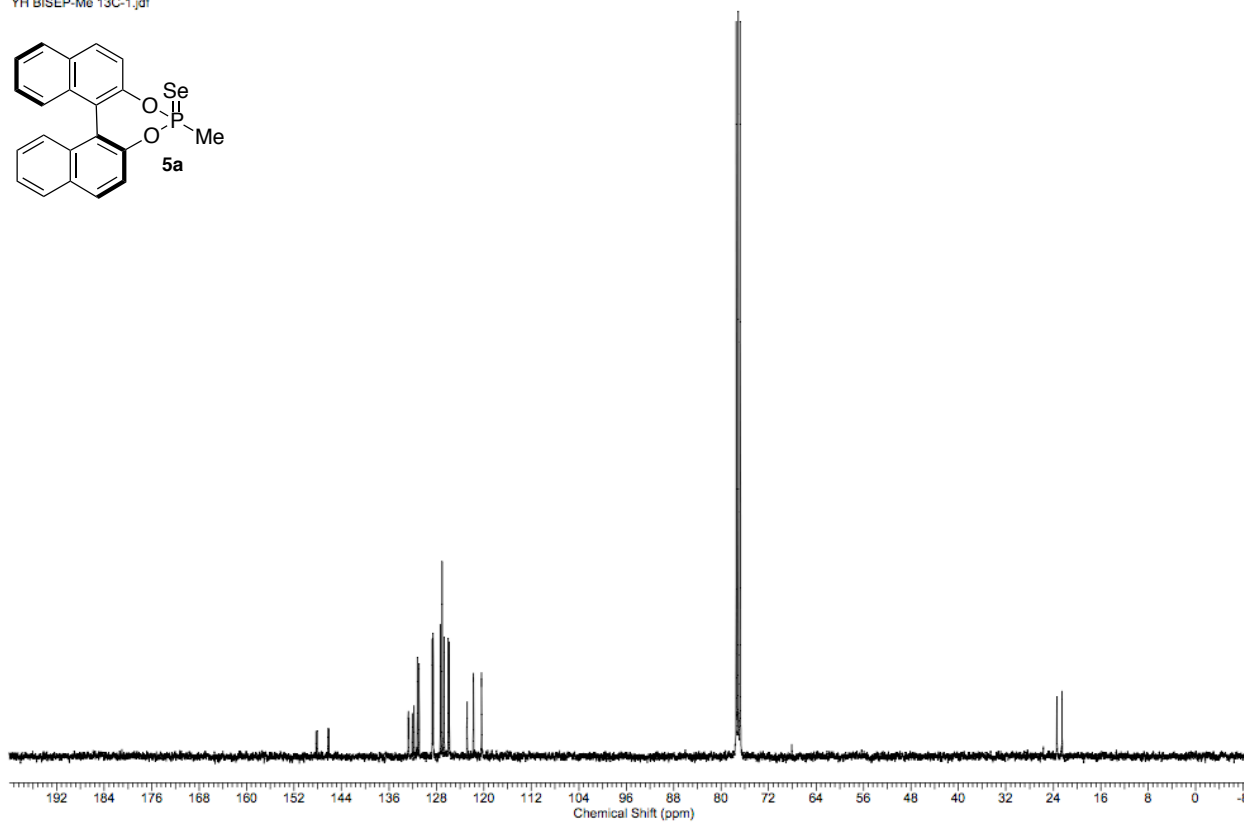





YH 170 column 6-11 1H-1.esp

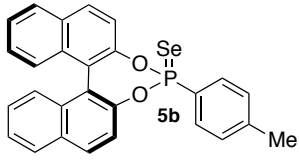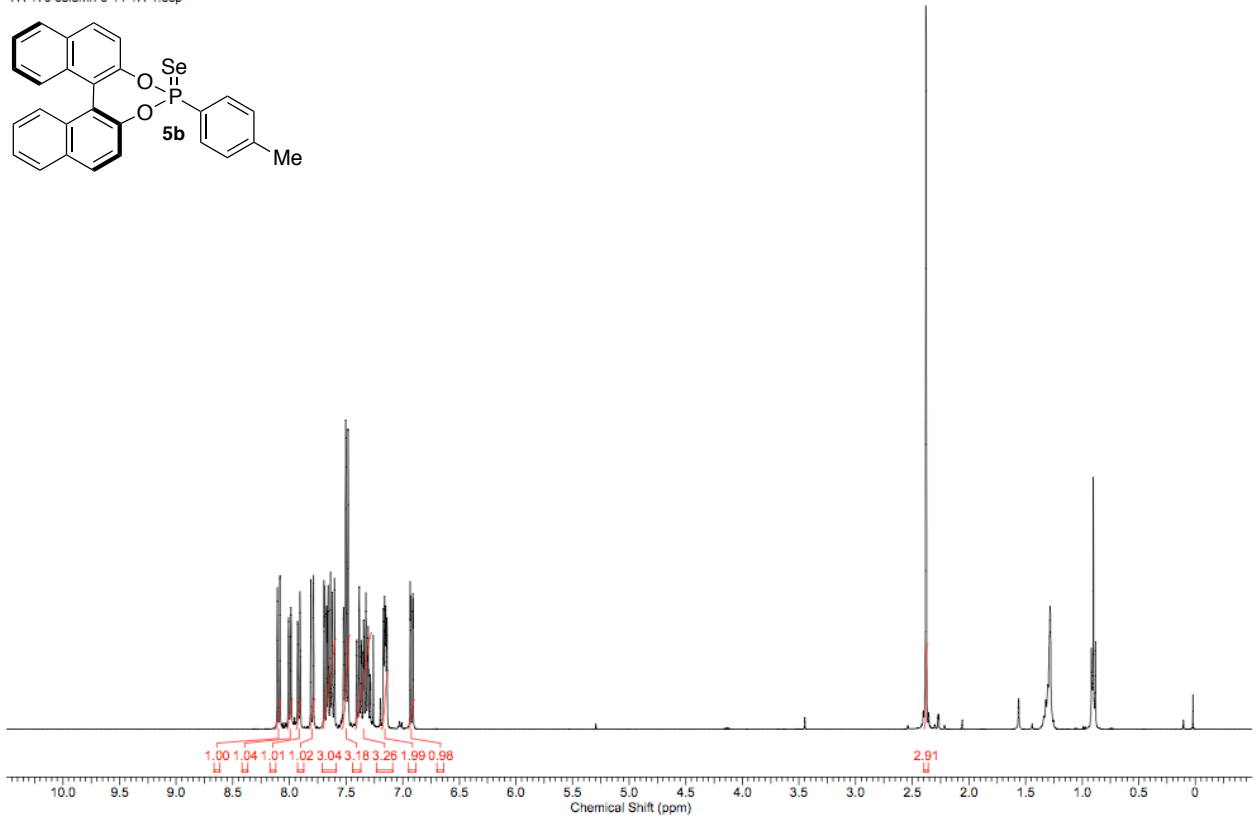

YH BISEP-4-Me-Ph-C6H4 13C-1.esp

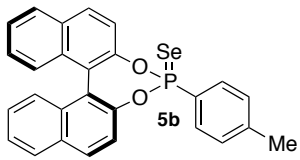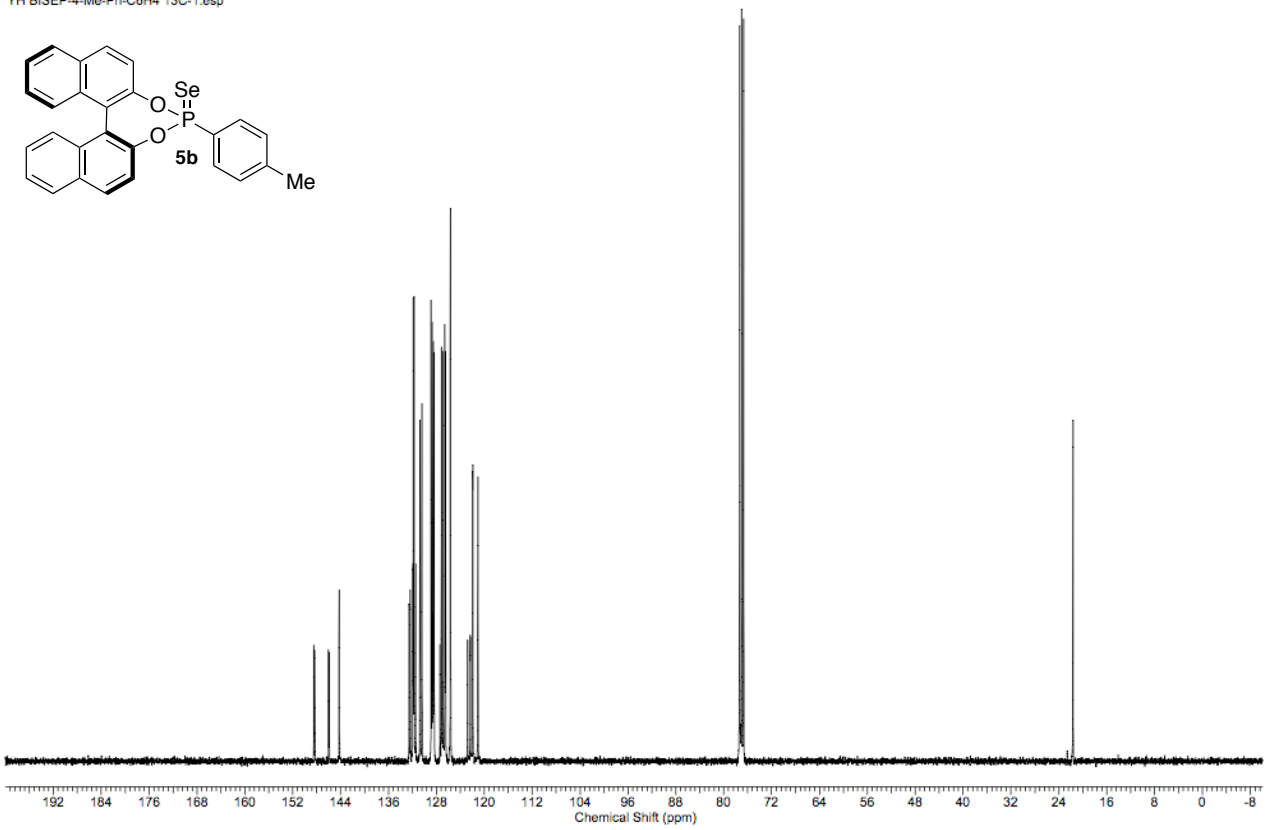

YH BISEP-Et 1H.als

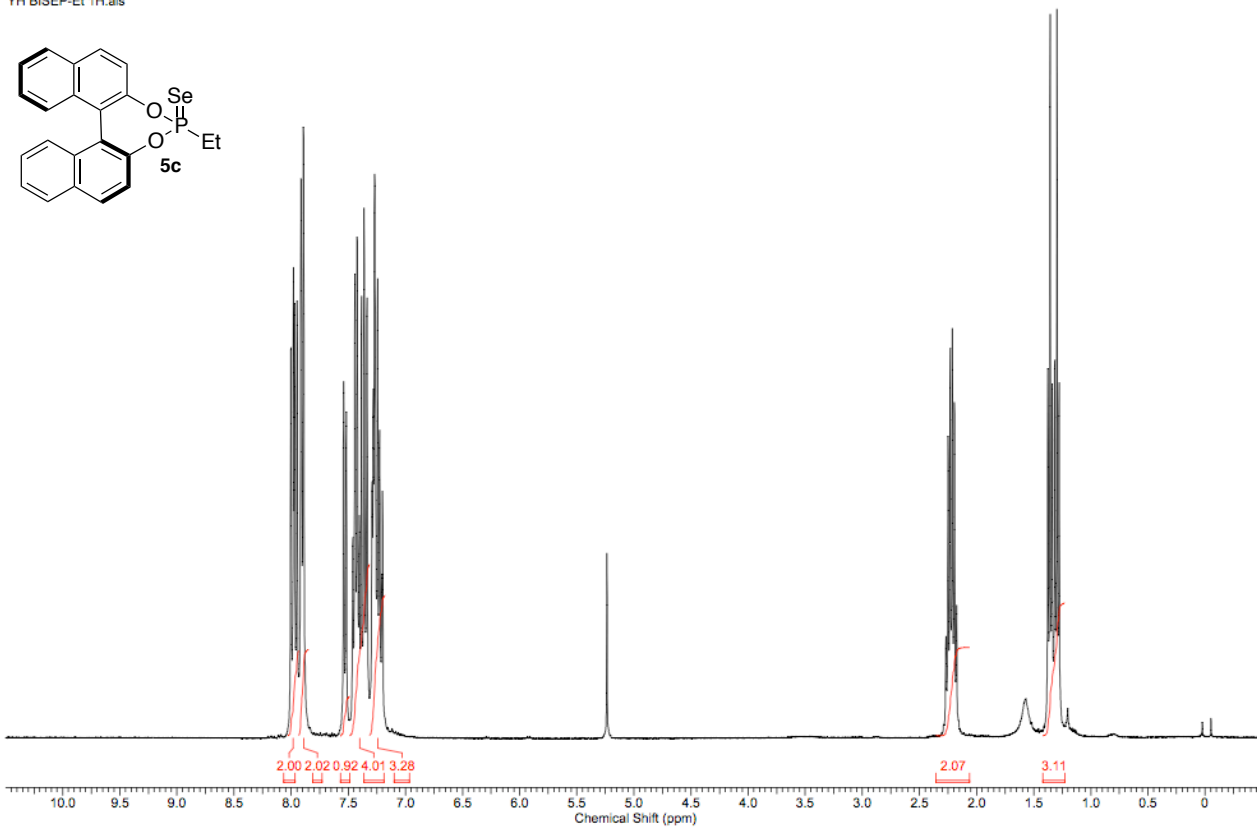

YH BISEP-Et 13C-1.esp

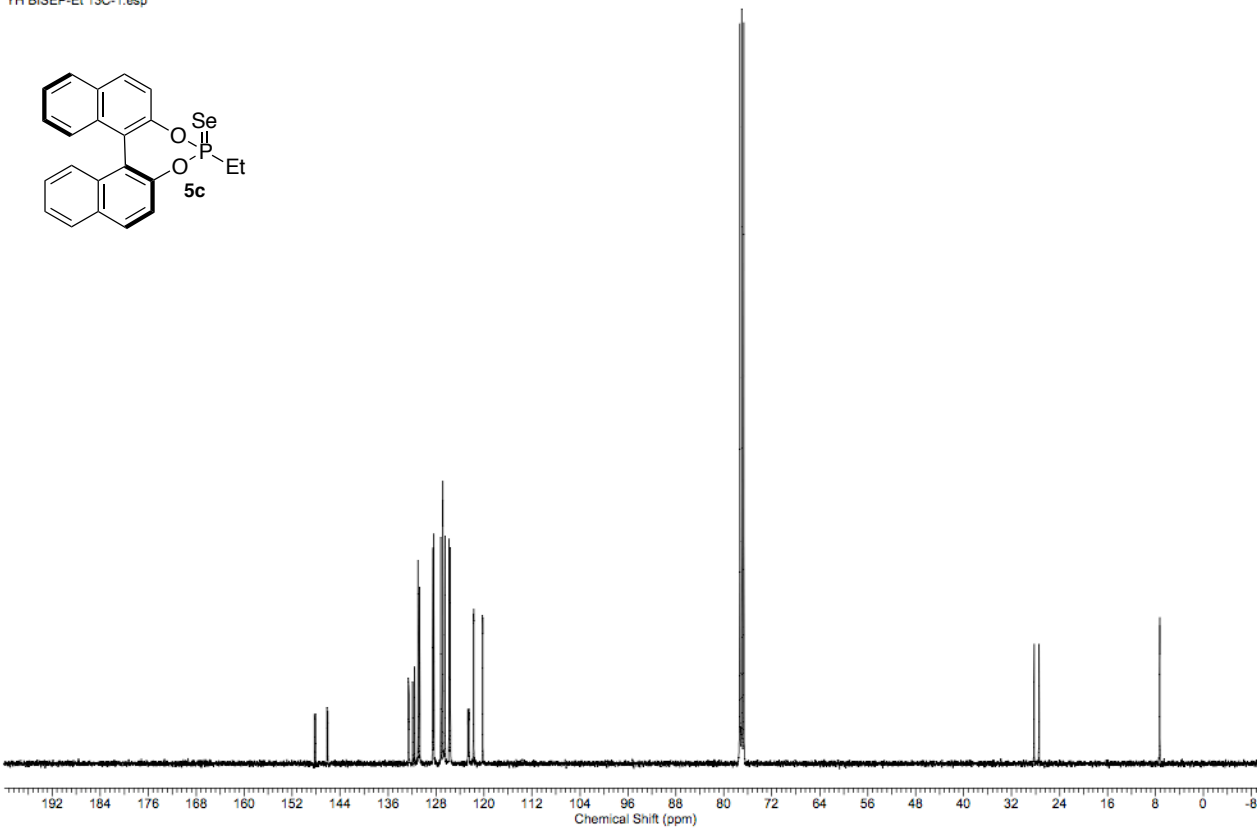

BISEP-Bn 1H-6.jdf

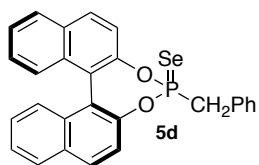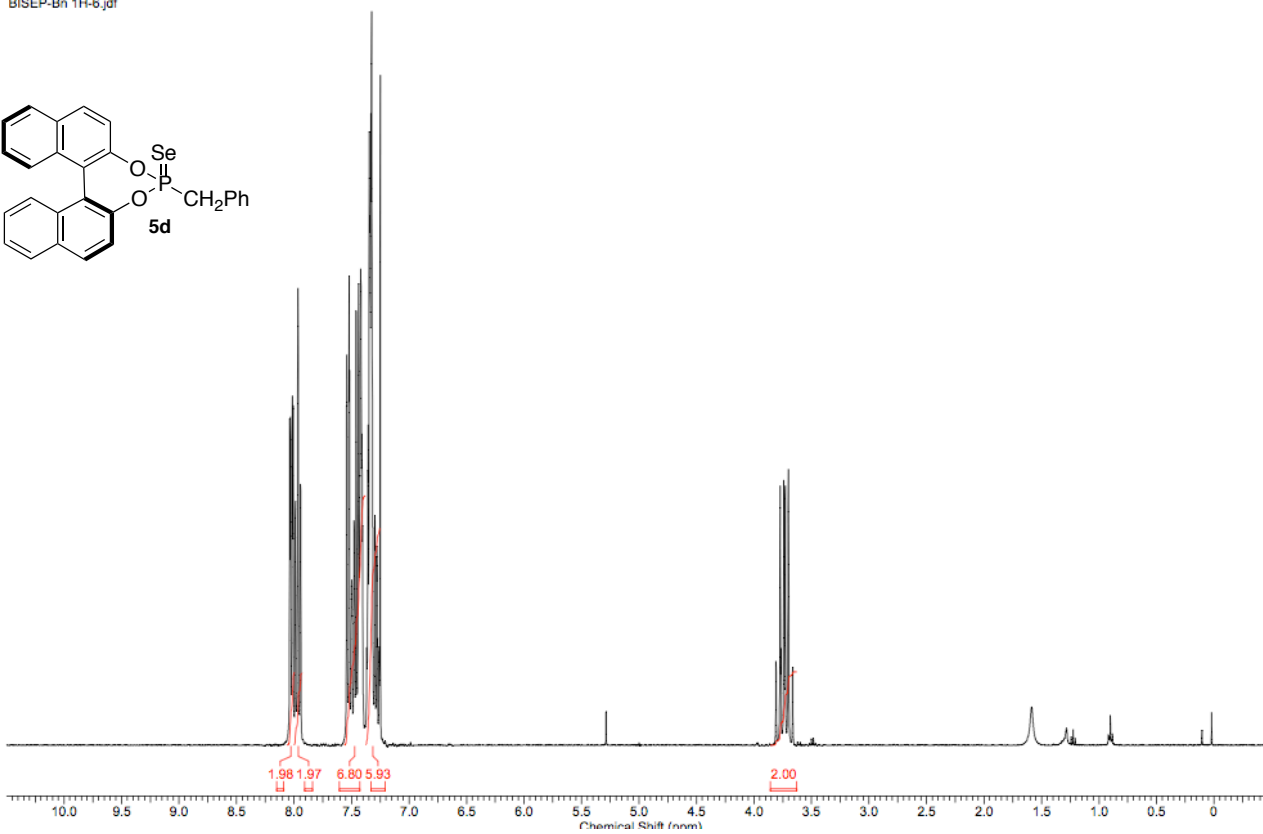

BISEP-Bn 13C-1.jdf

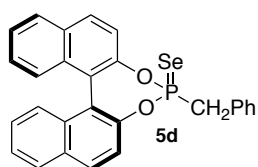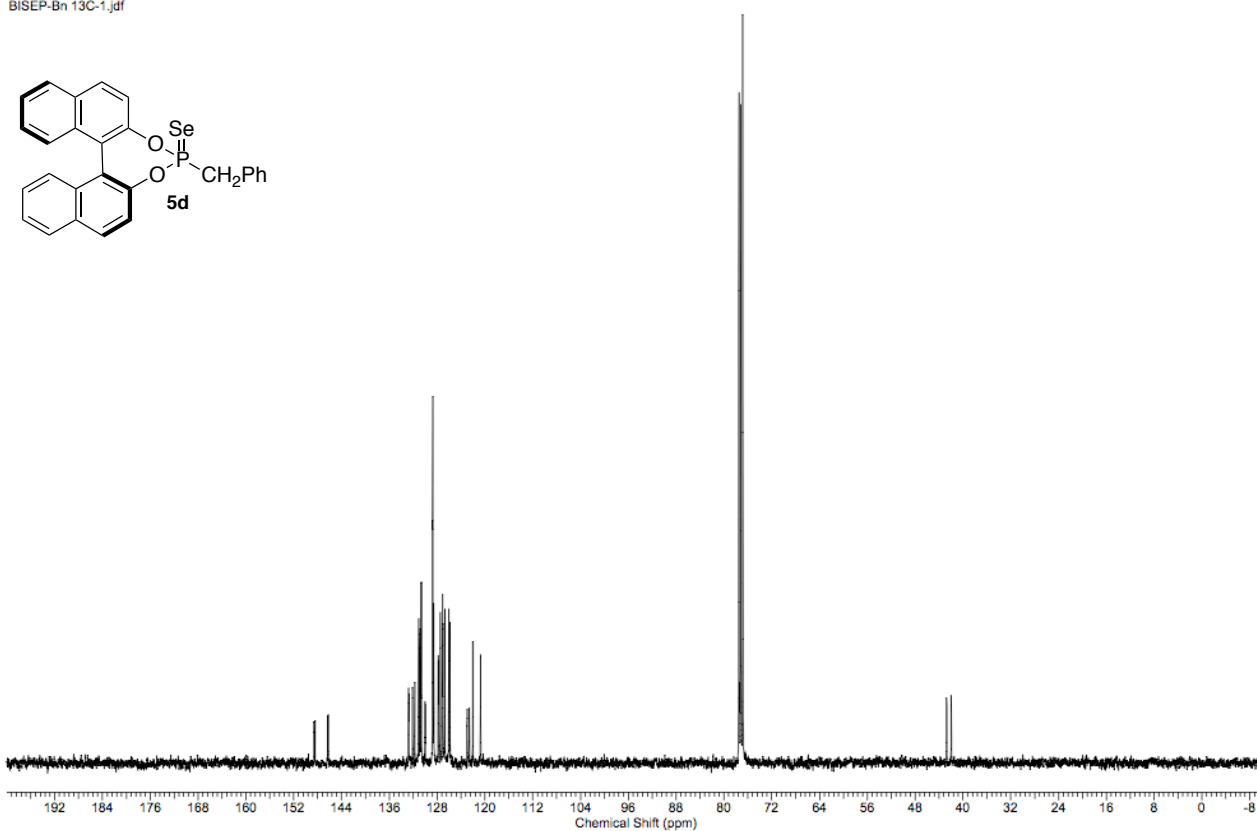

BISEP-EtPh 1H-2.jdf

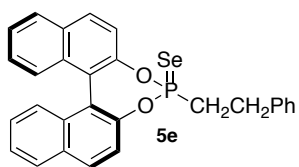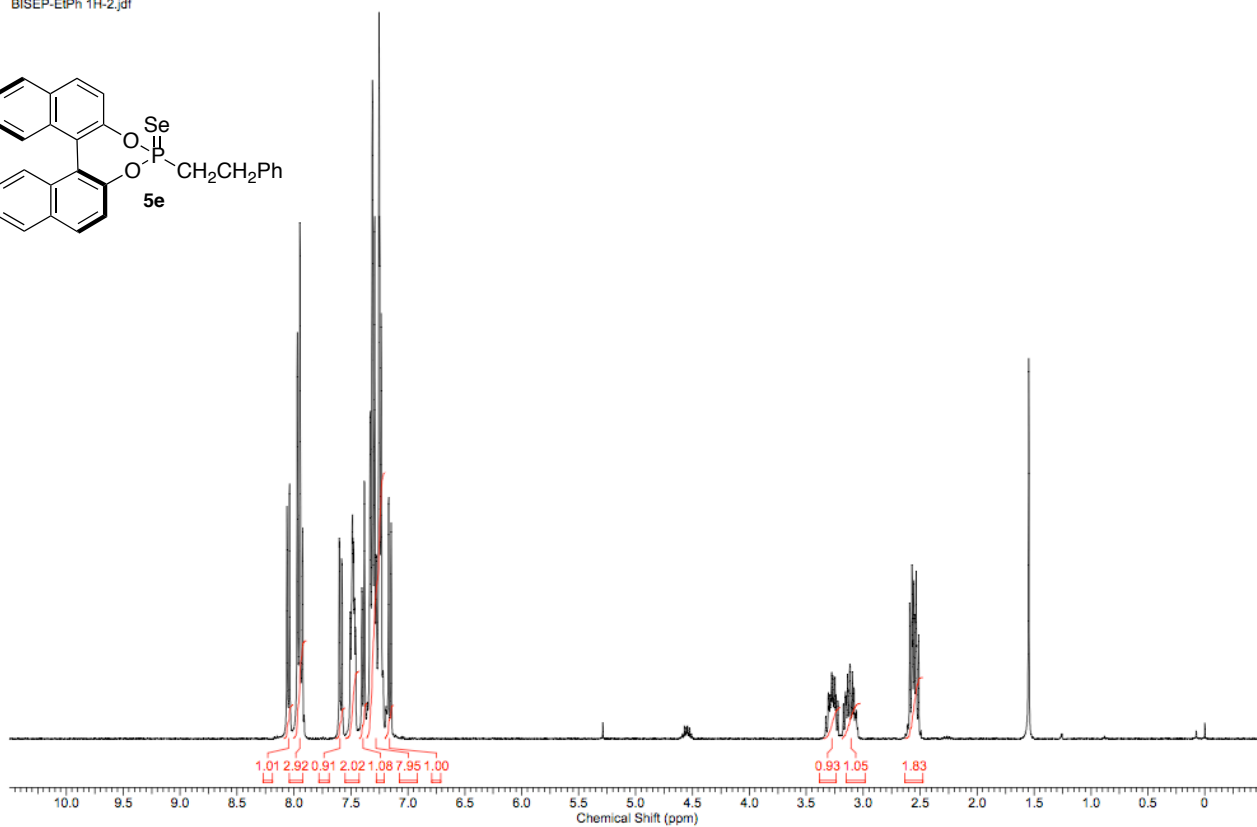

BISEP-EtPh 13C-2.jdf

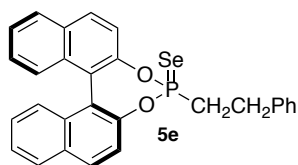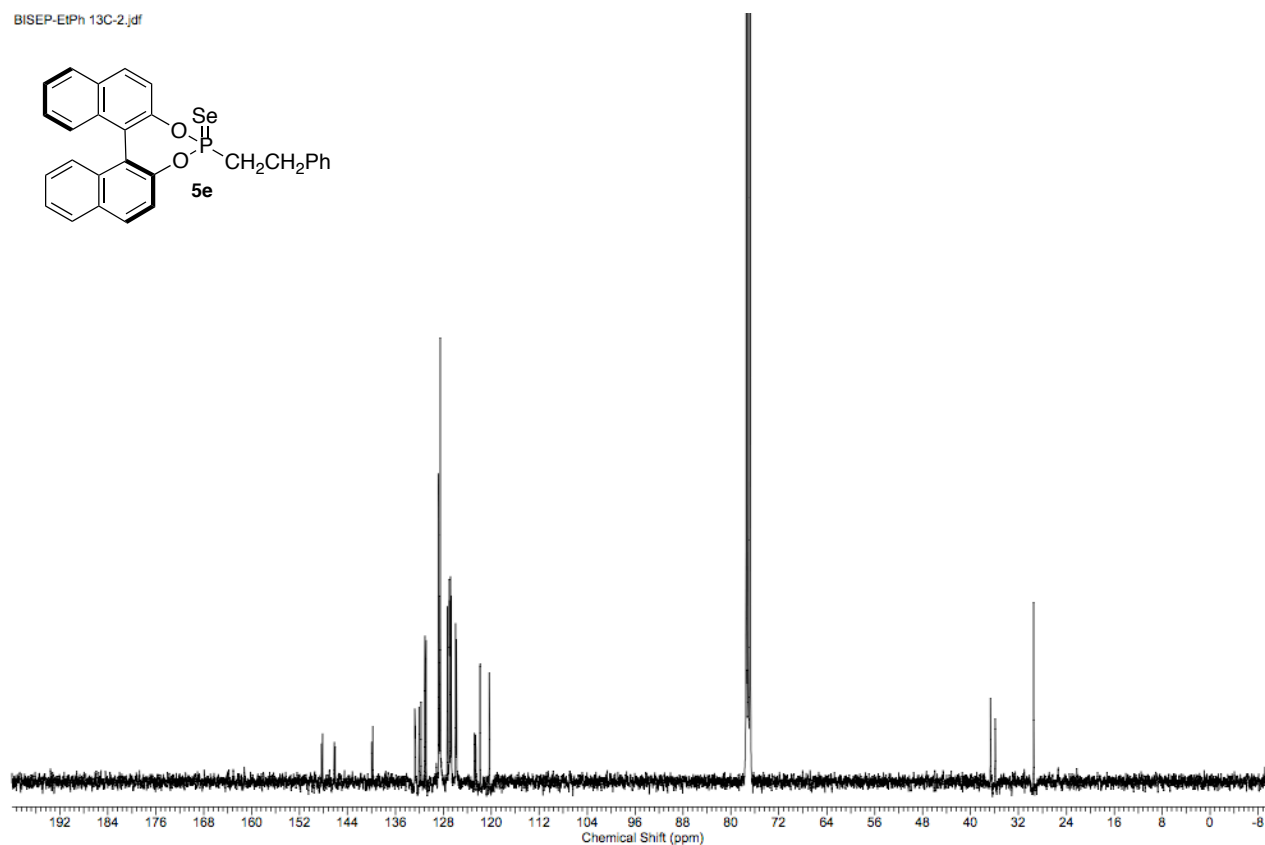

YM710 column 1H-5.jdf

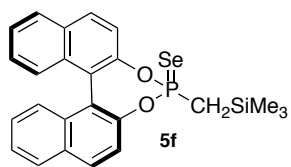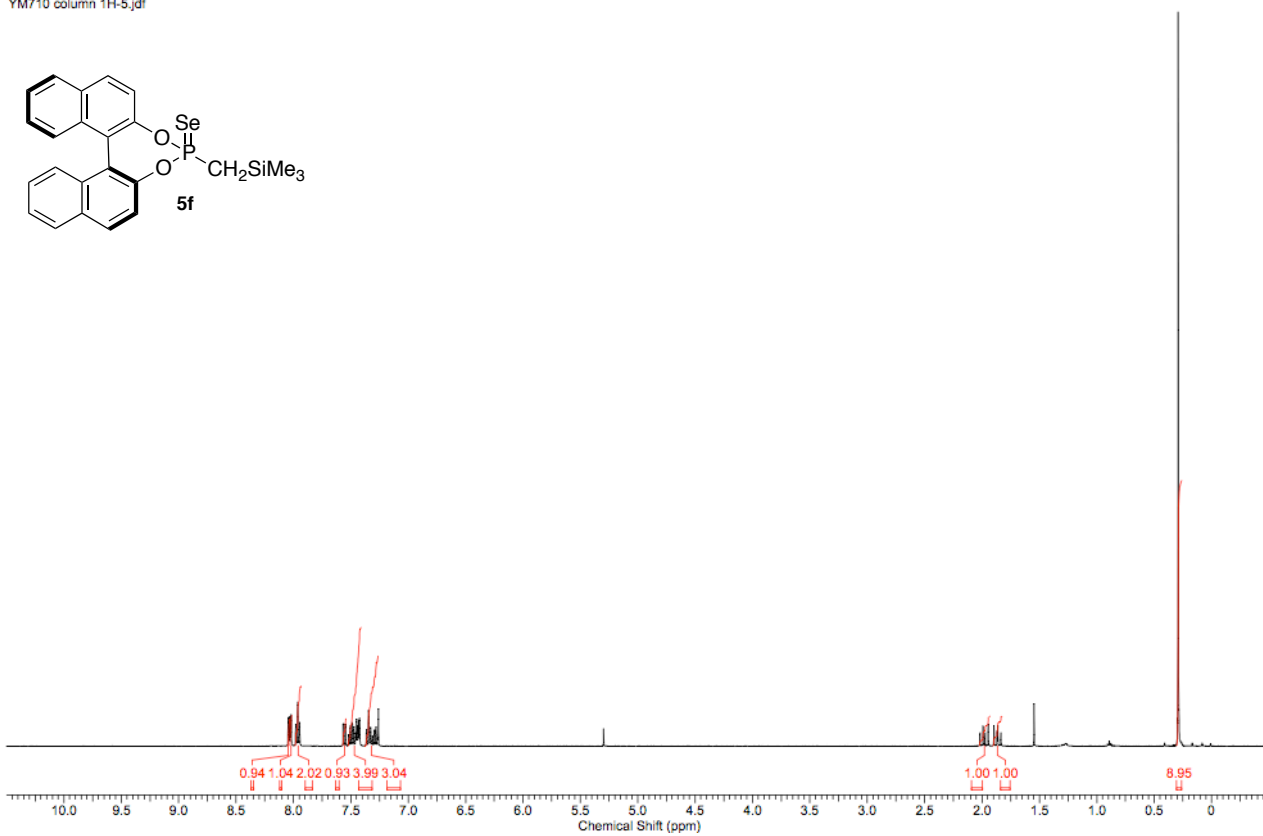

YM710 column 13C-4.jdf

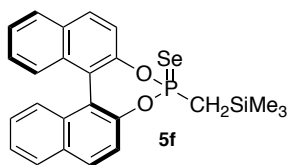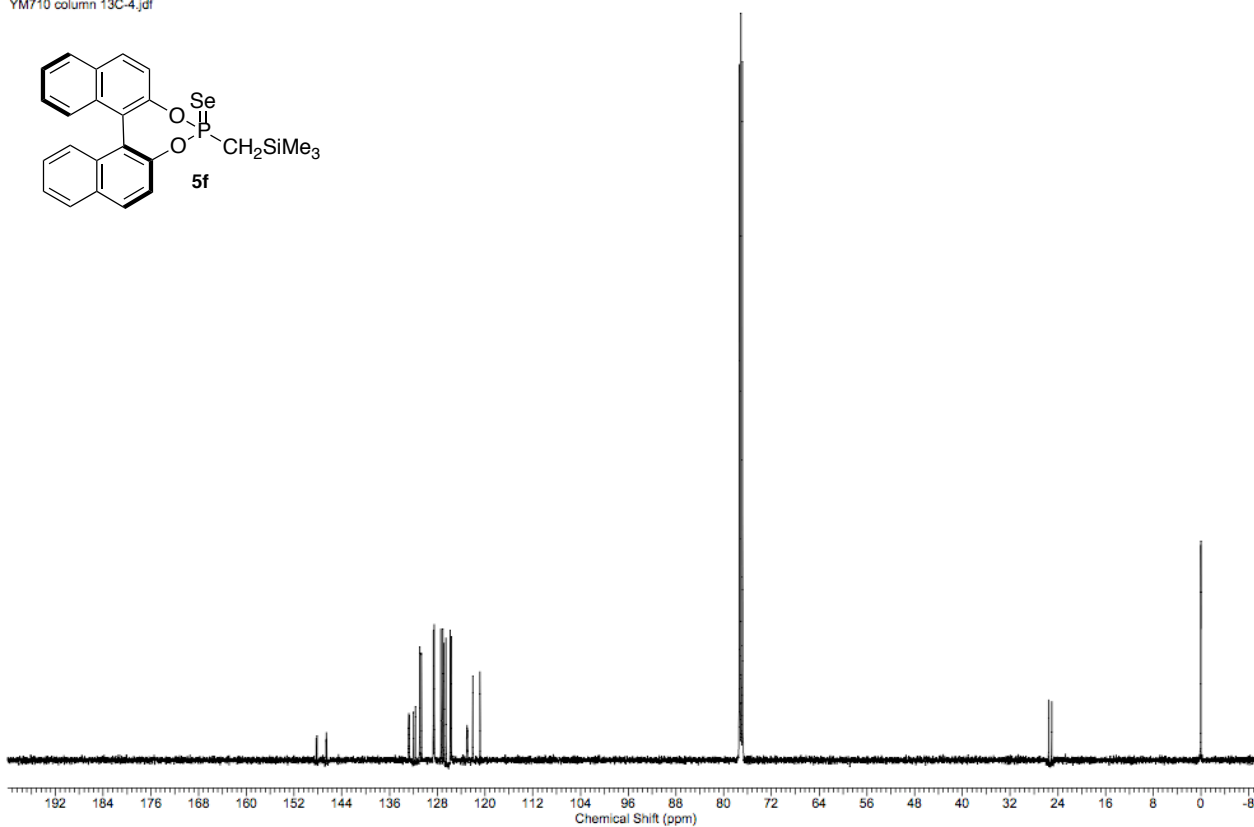

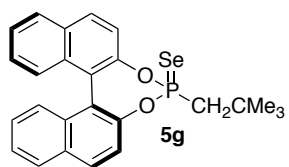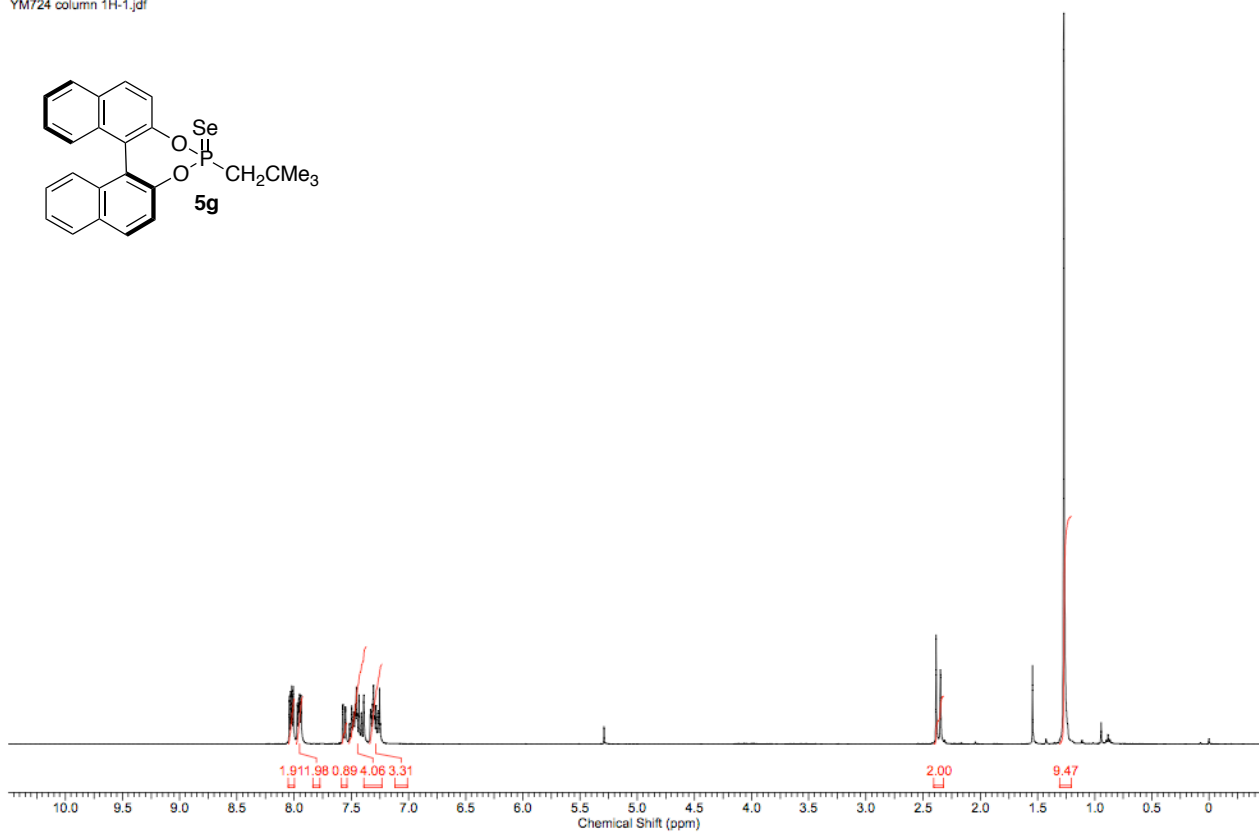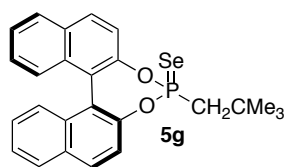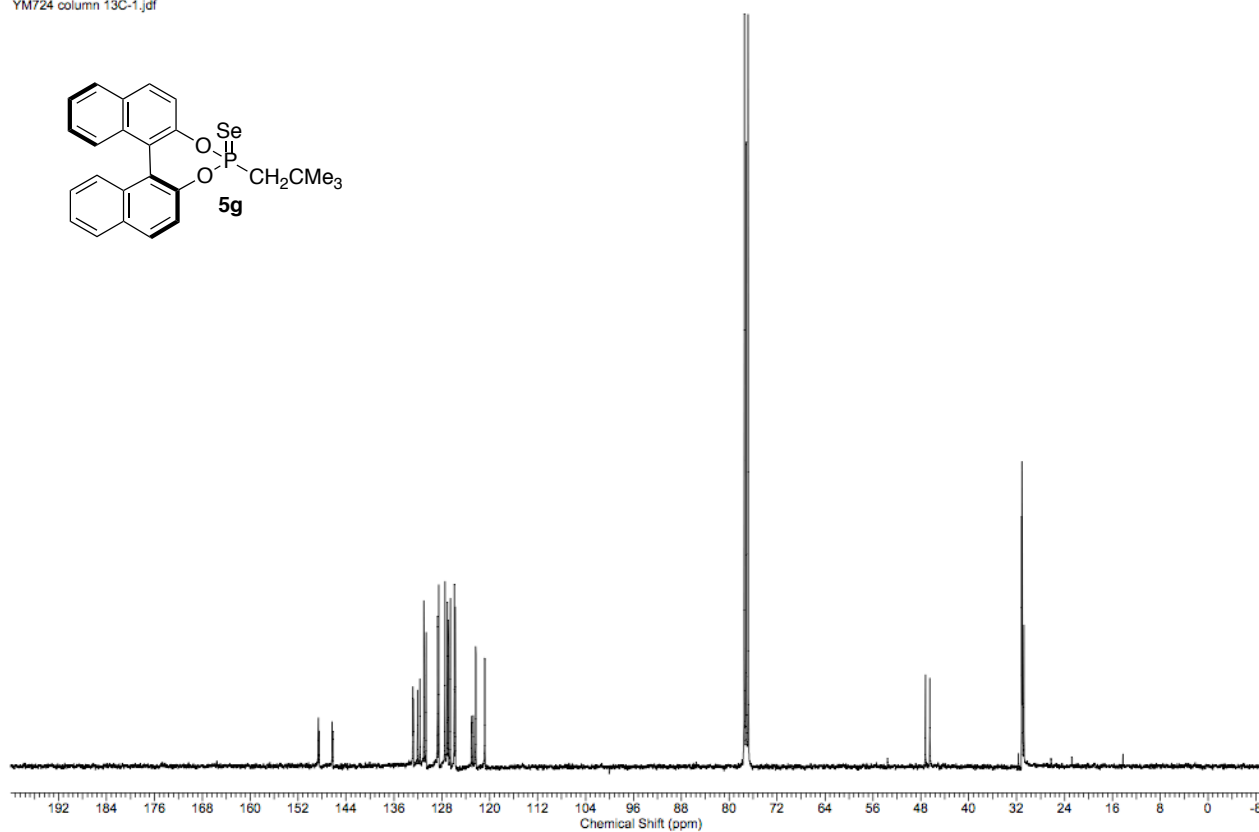

YH BISEP-Cyclohexyl 1H-1.esp

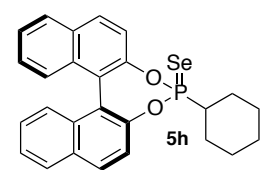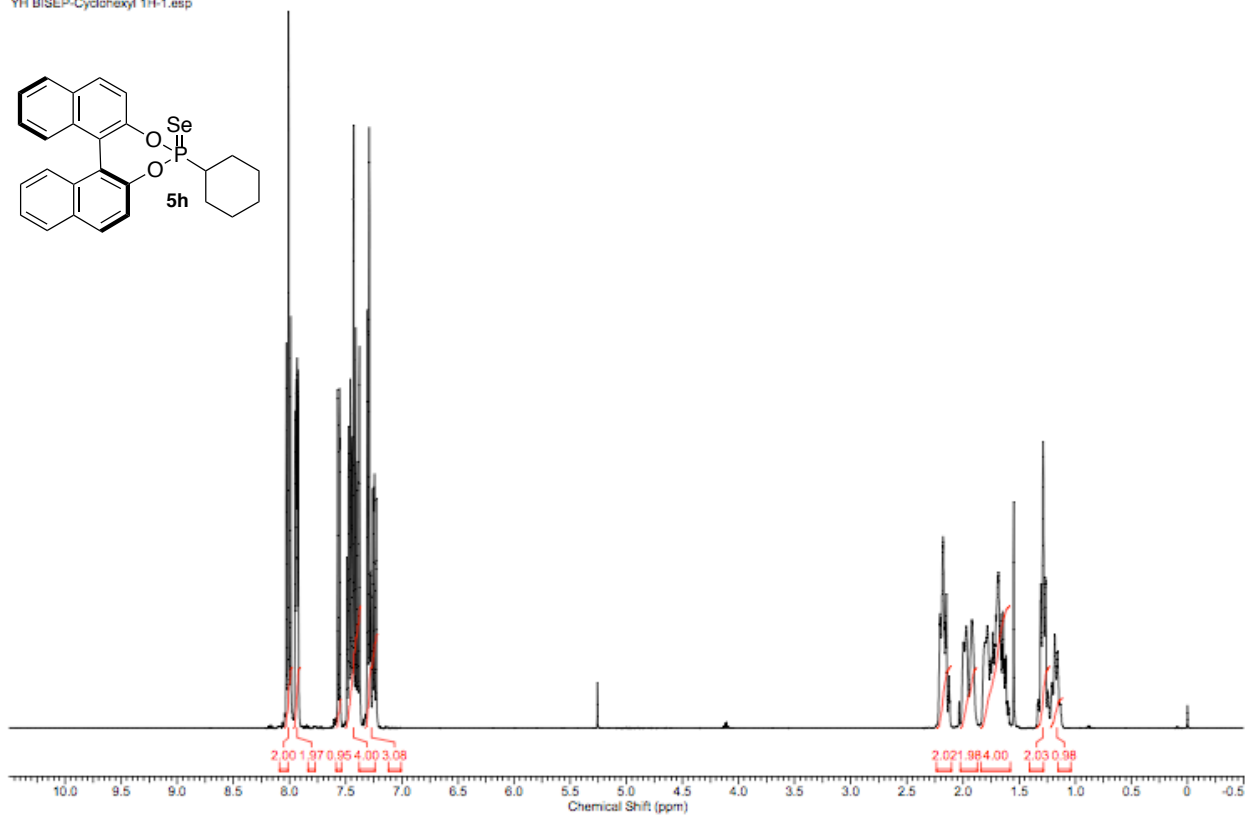

YH BISEP-Cyclohexyl 13C-1.esp

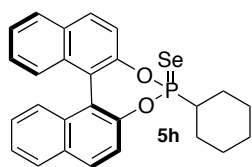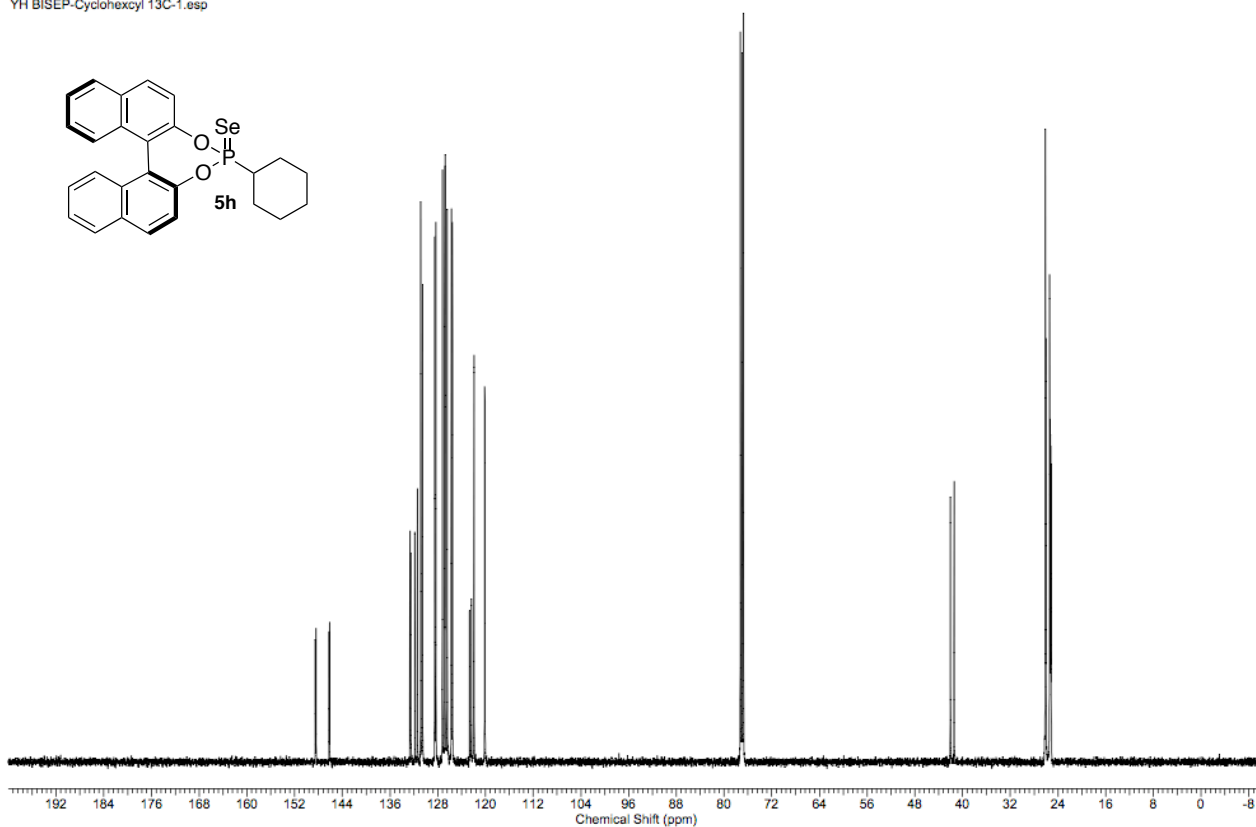

KK t-Bu 1H.jdf

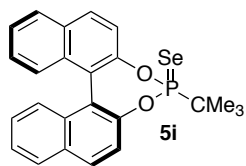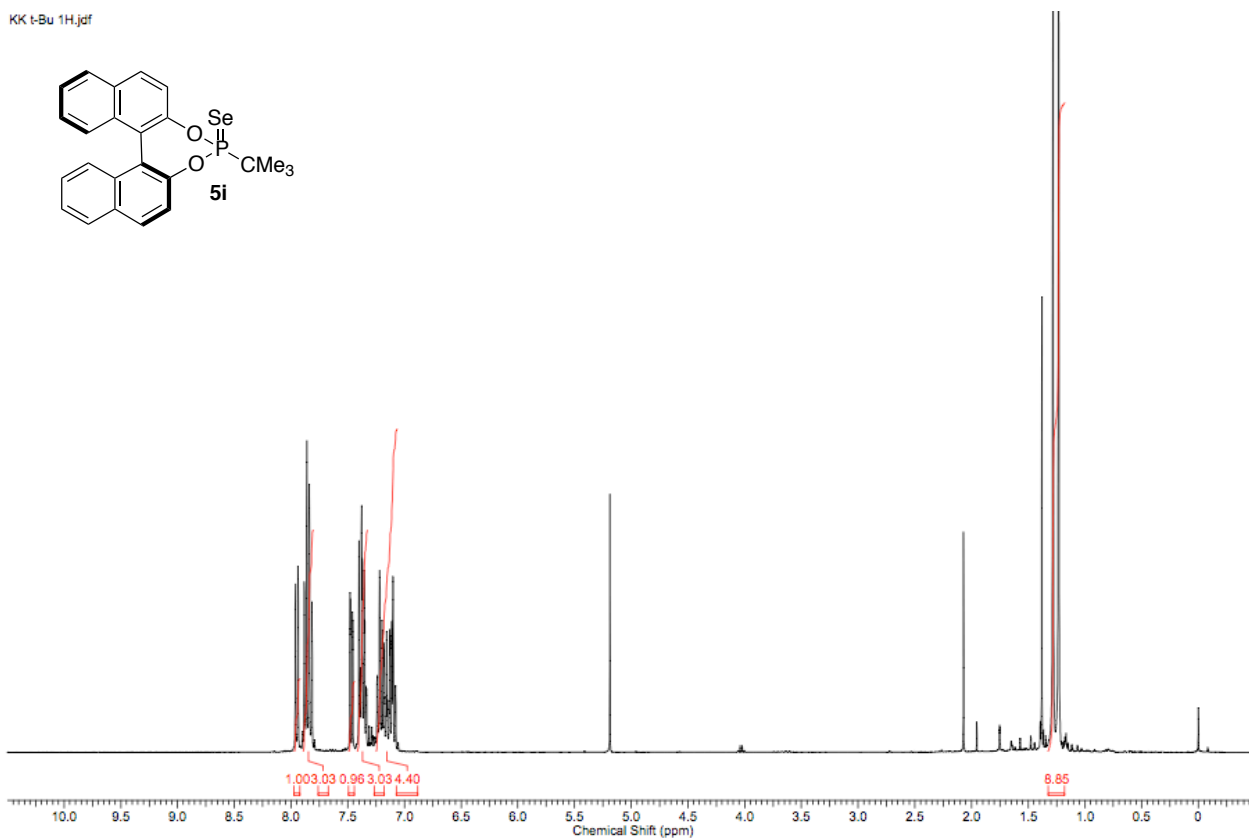

KK t-Bu 13C.jdf

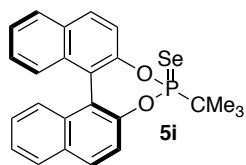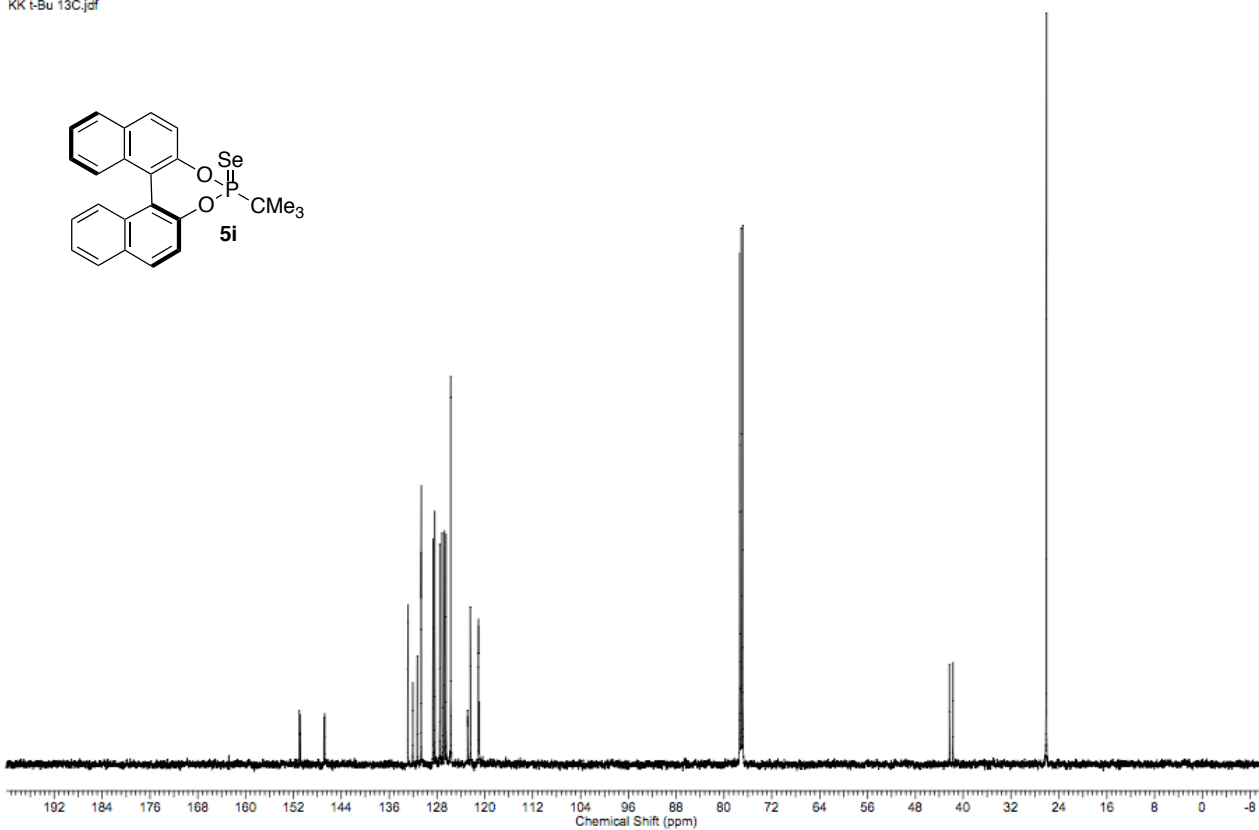



BISEP-Allyl 1H 9-1.esp

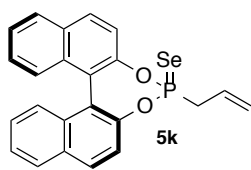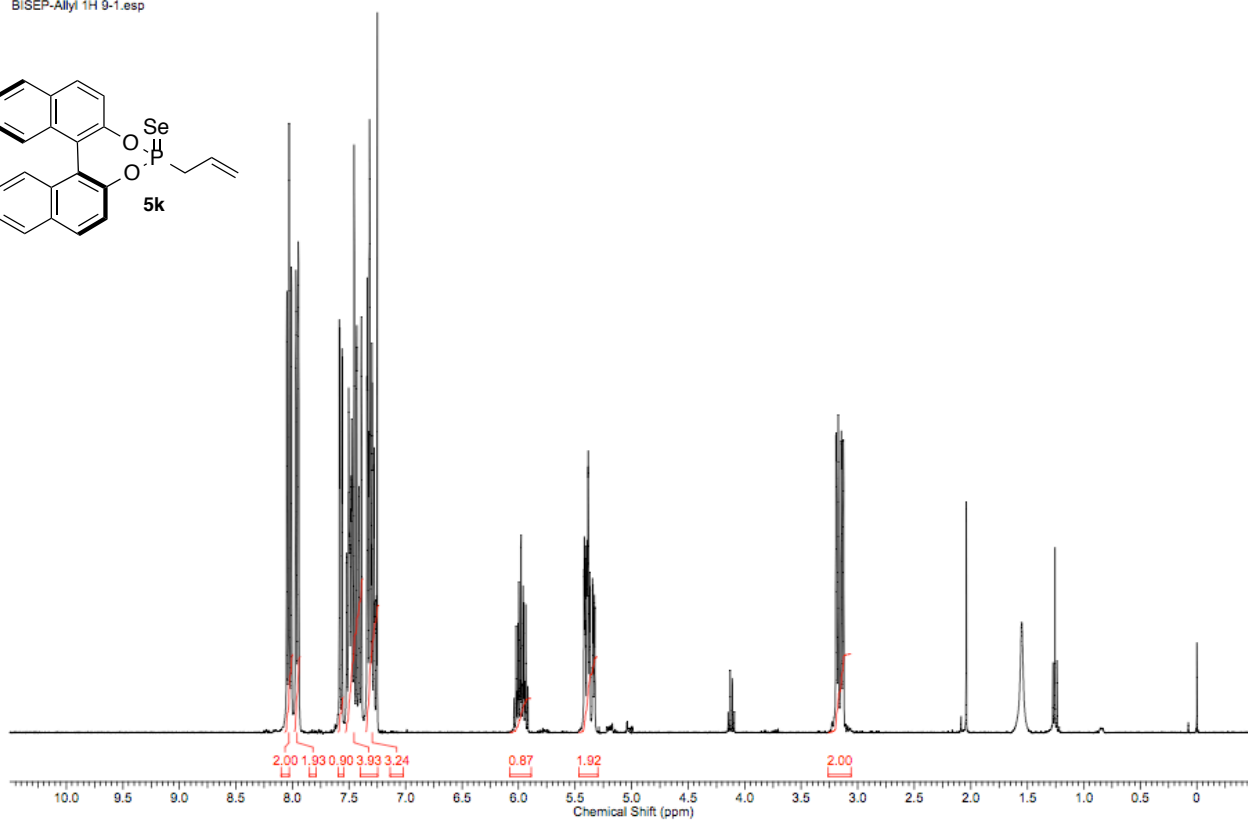

YH BISEP-Allyl 13C-1.esp

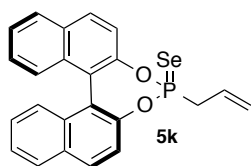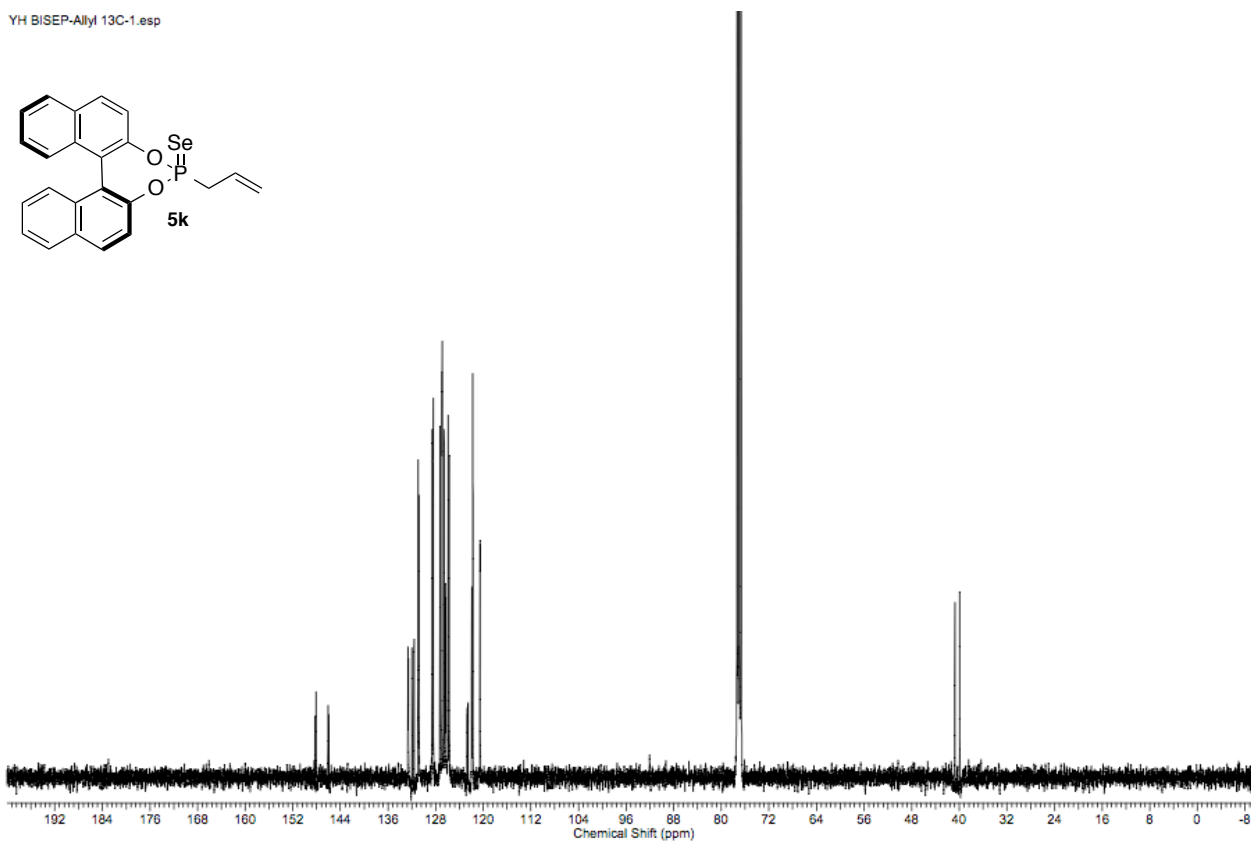

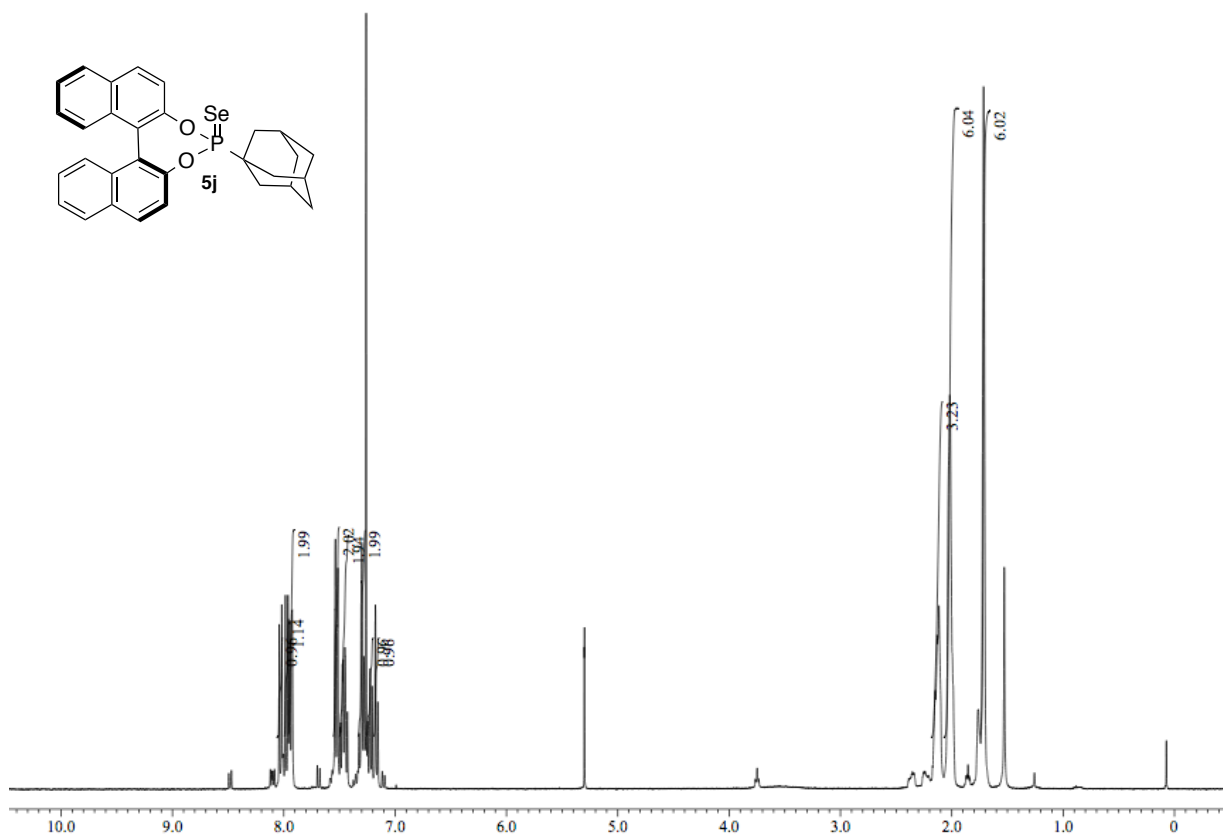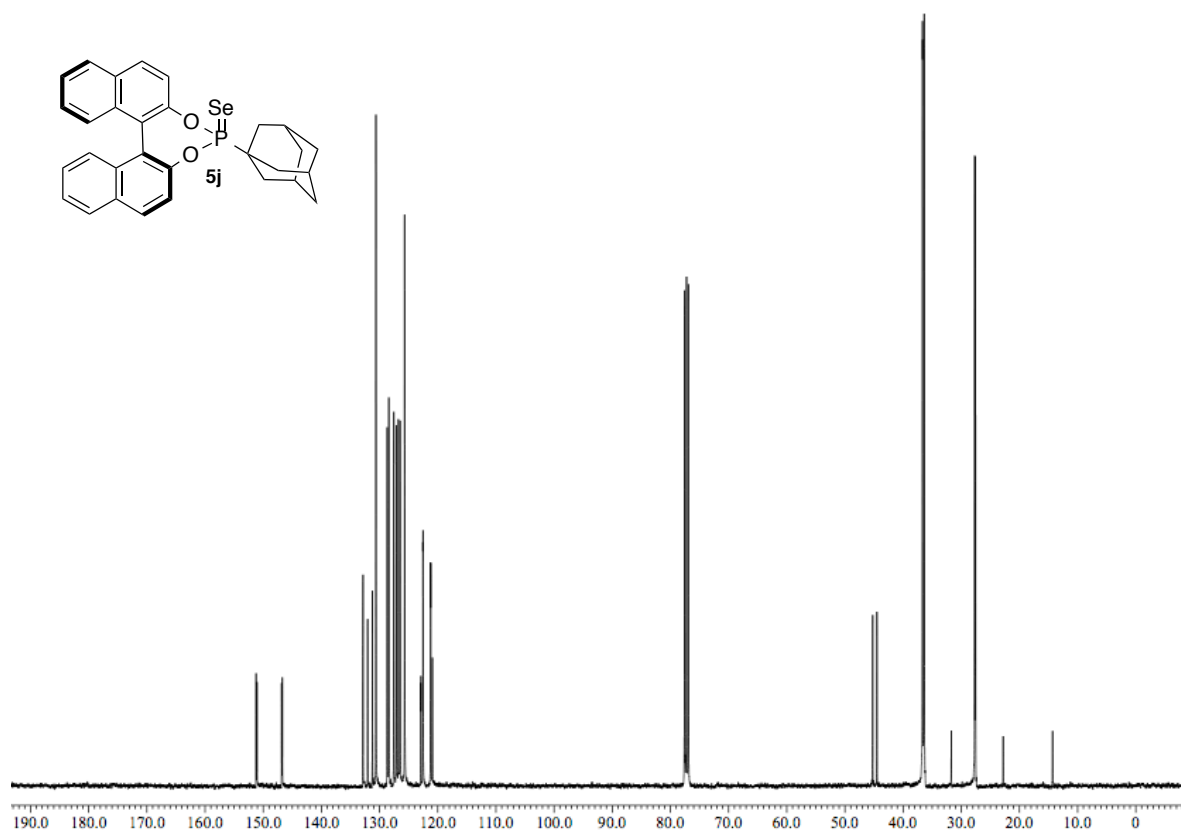

YH 185 column 10-20 1H.esp

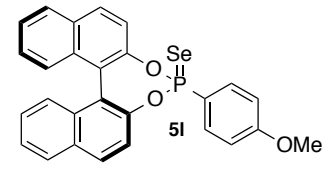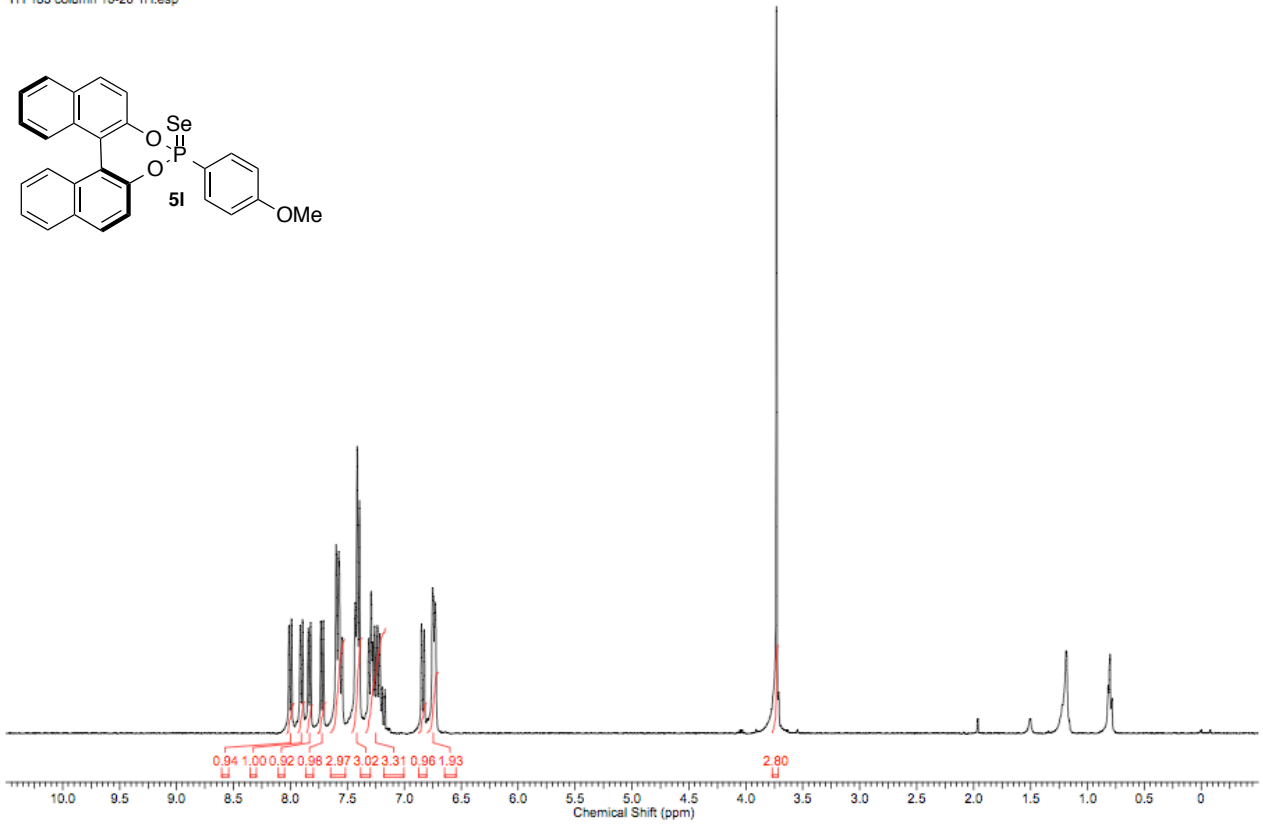

BISEP-ome 13C.esp

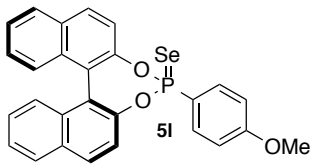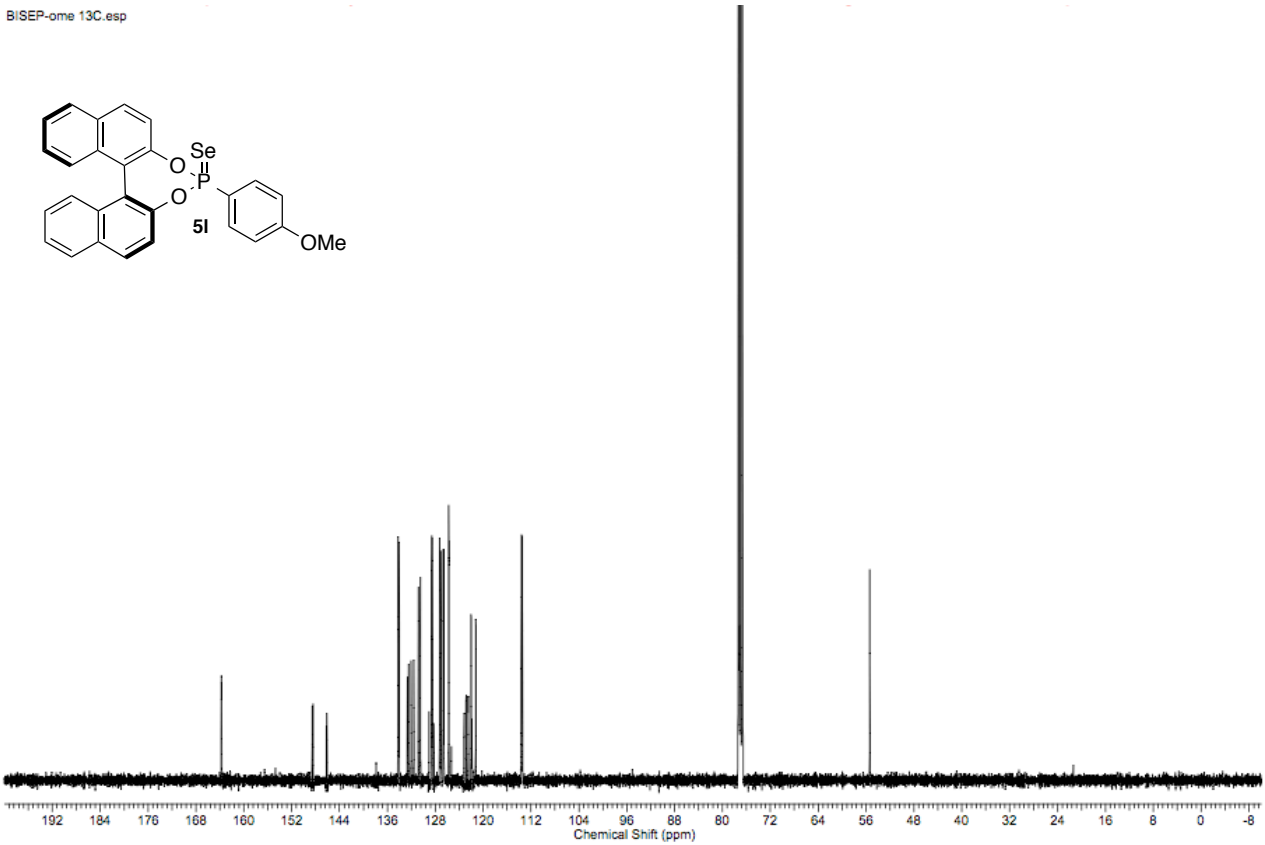

YH BISEP-4F-C6H4 1H-1.esp

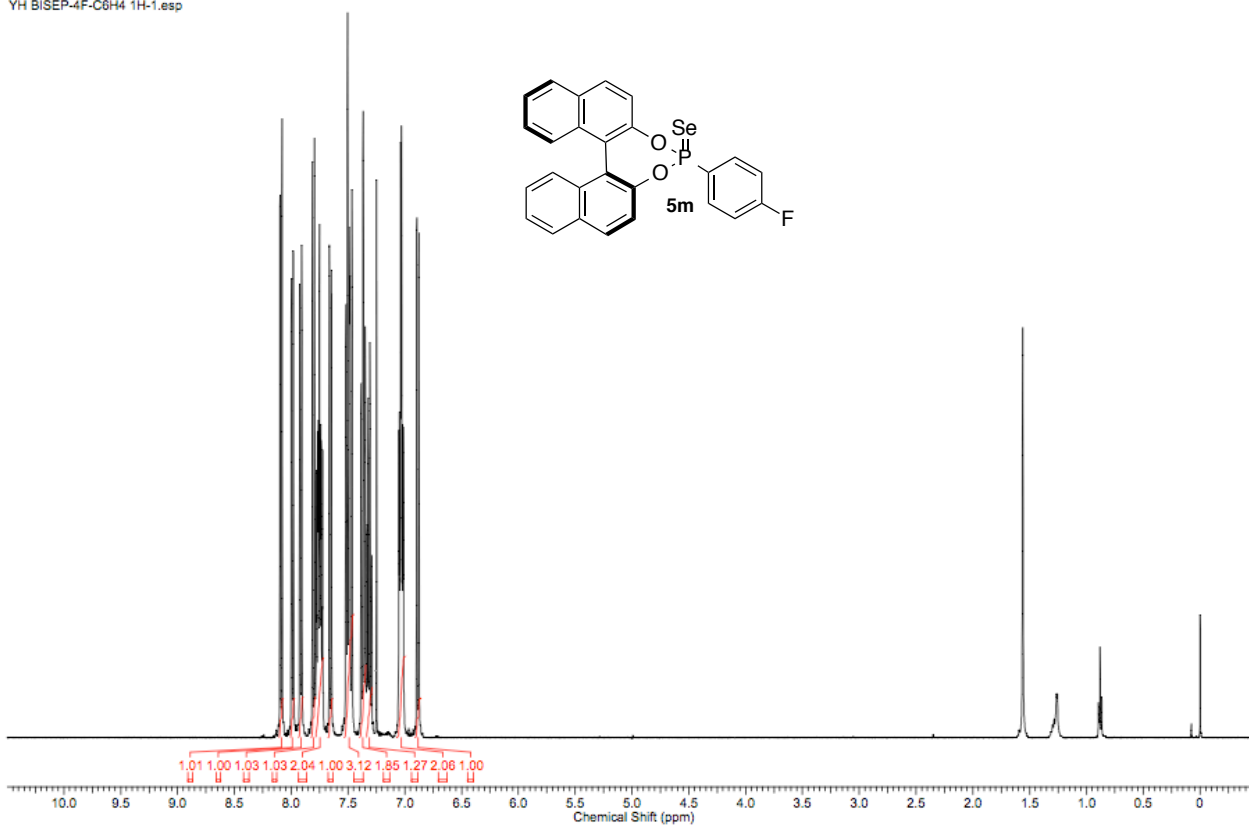

YH BISEP-4F-C6H4 13C-1.esp

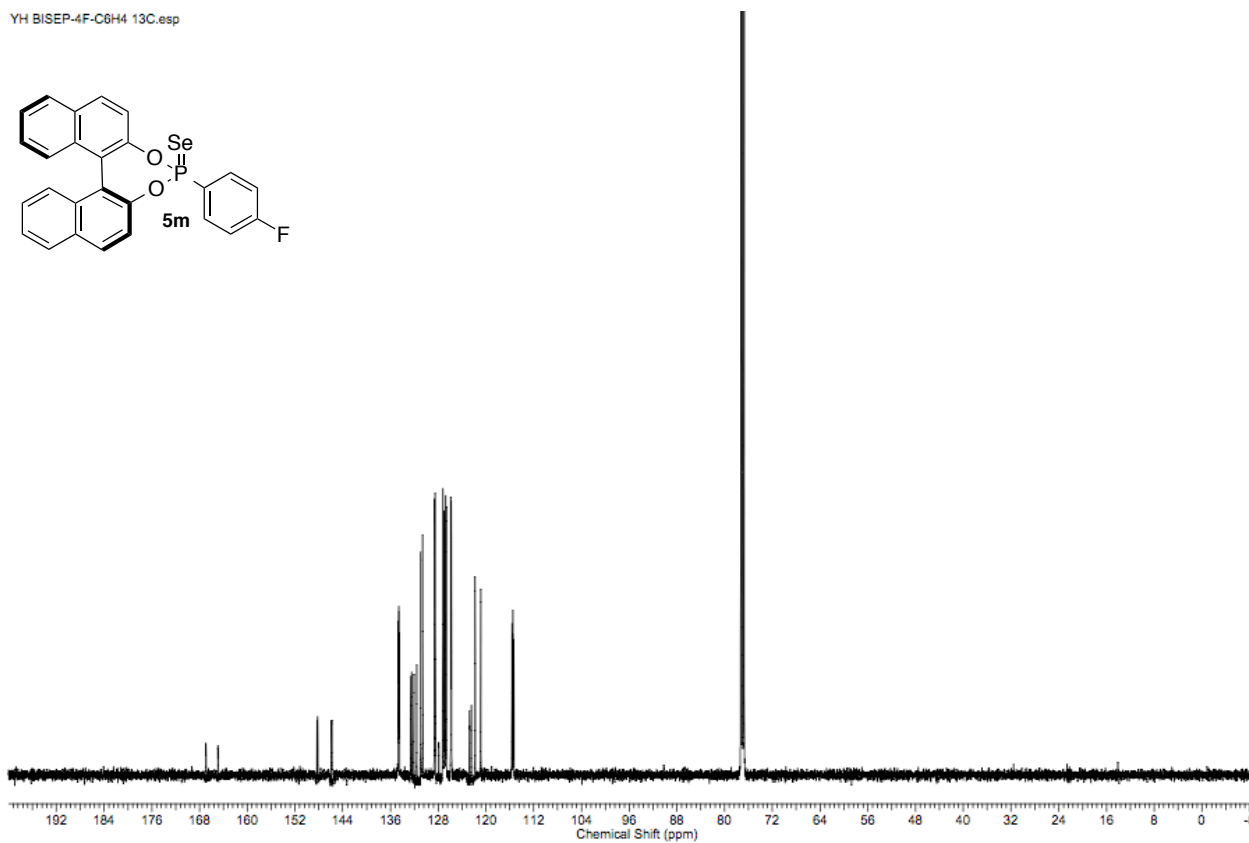

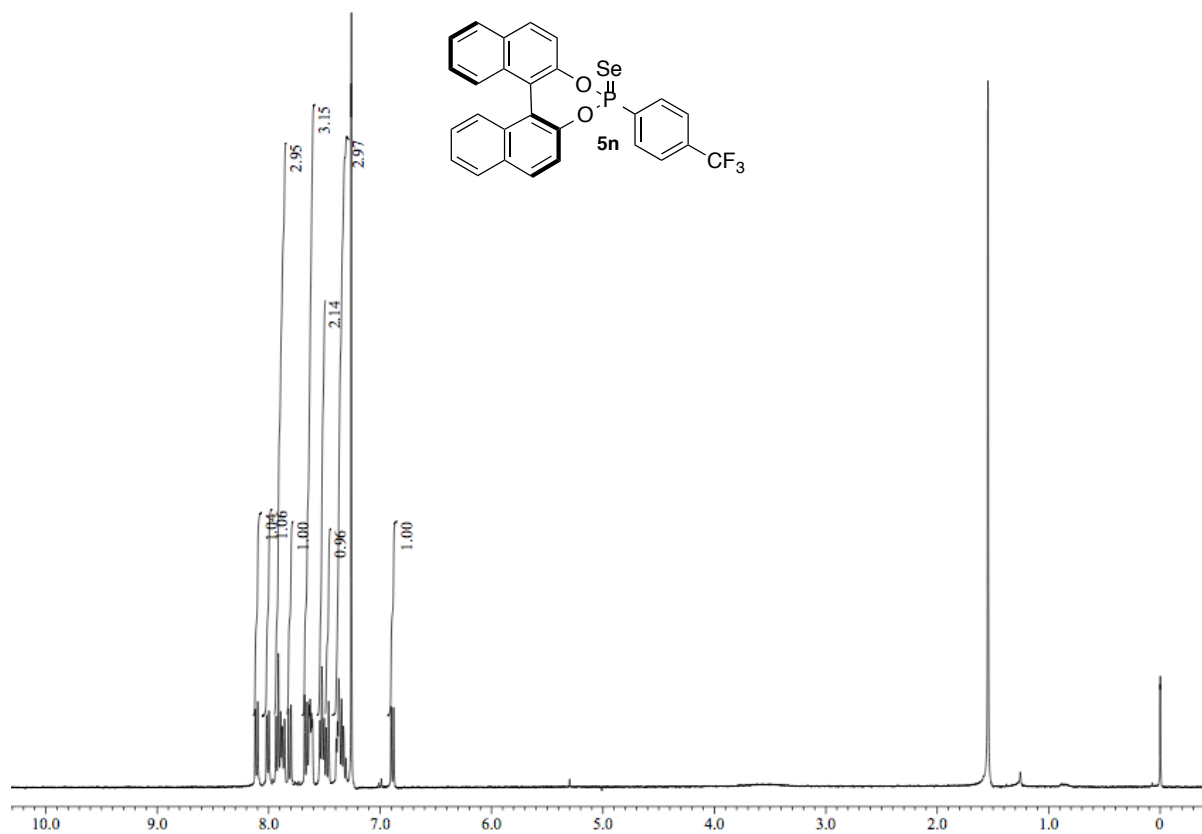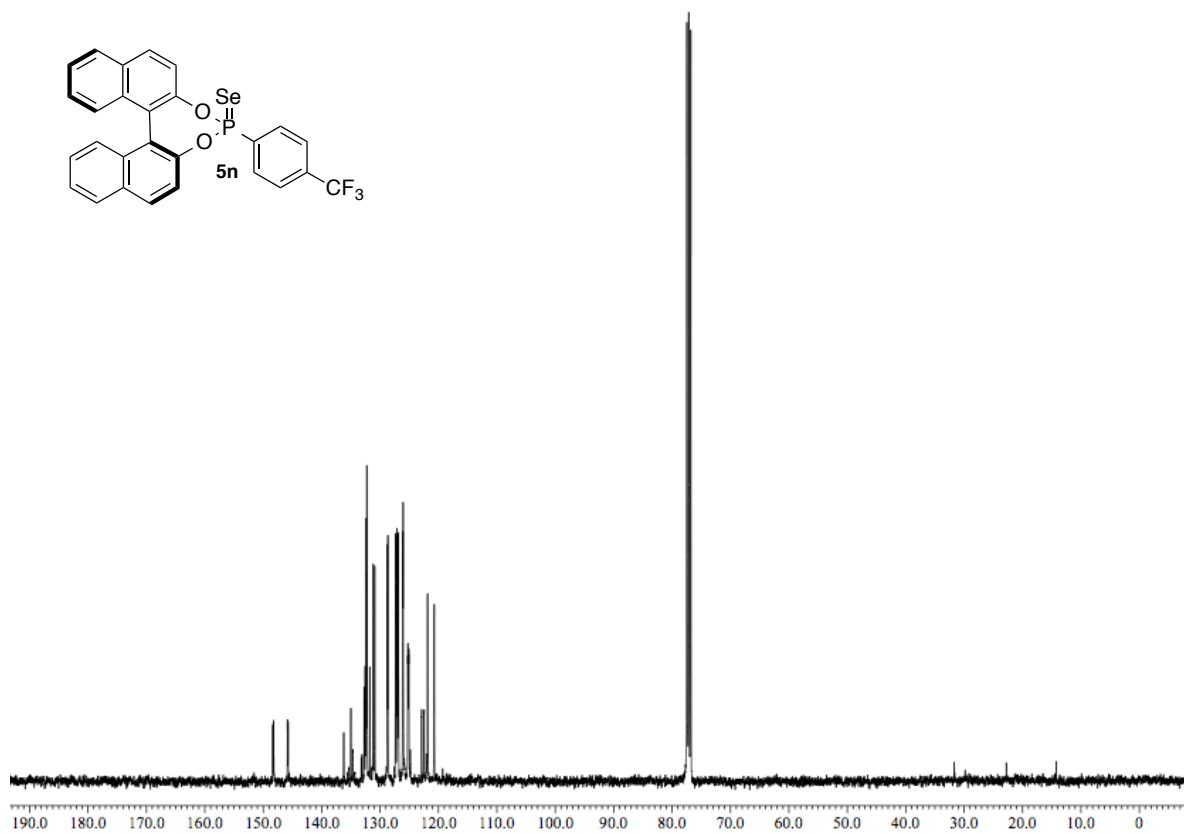

YH BISEP-o-OMe 1H-1.esp

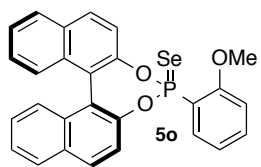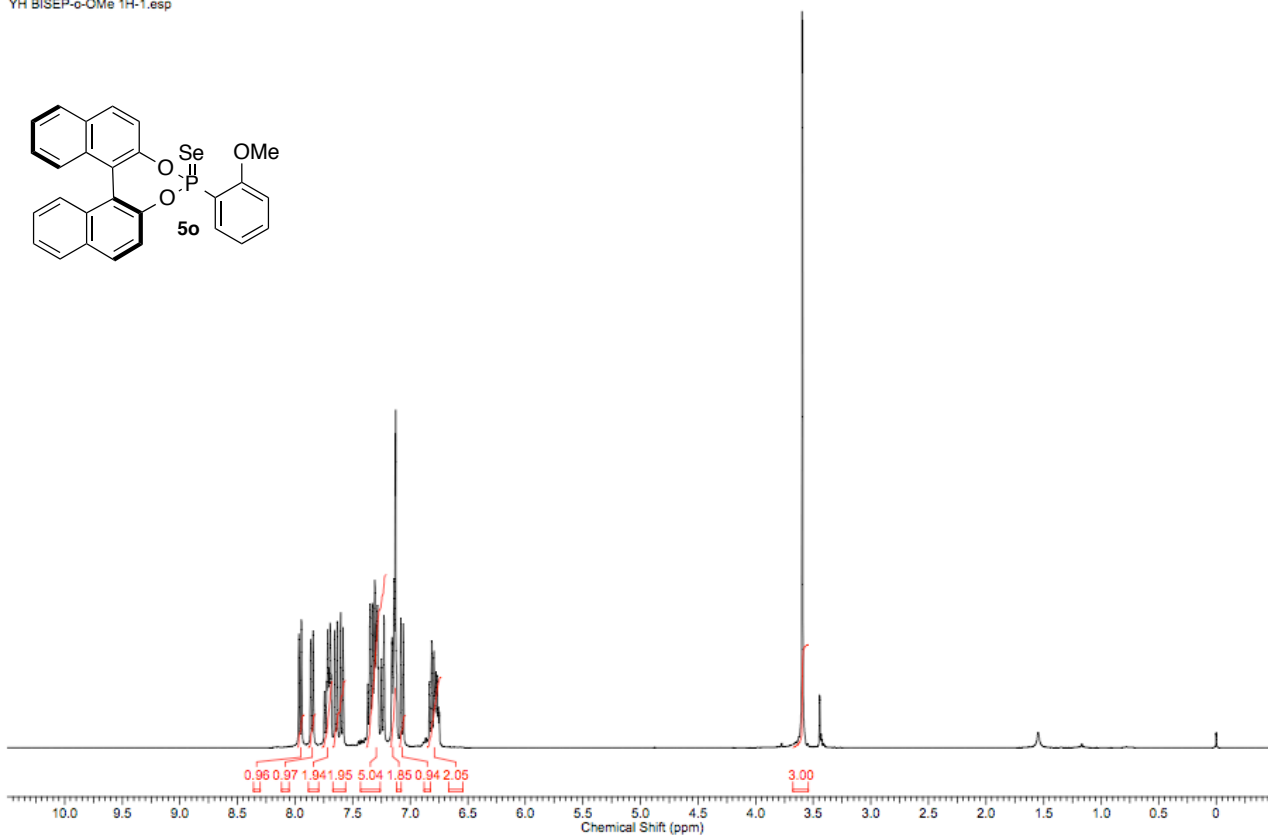

BISEP-ome 13C.esp

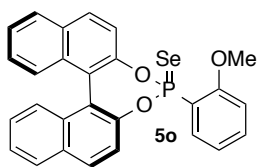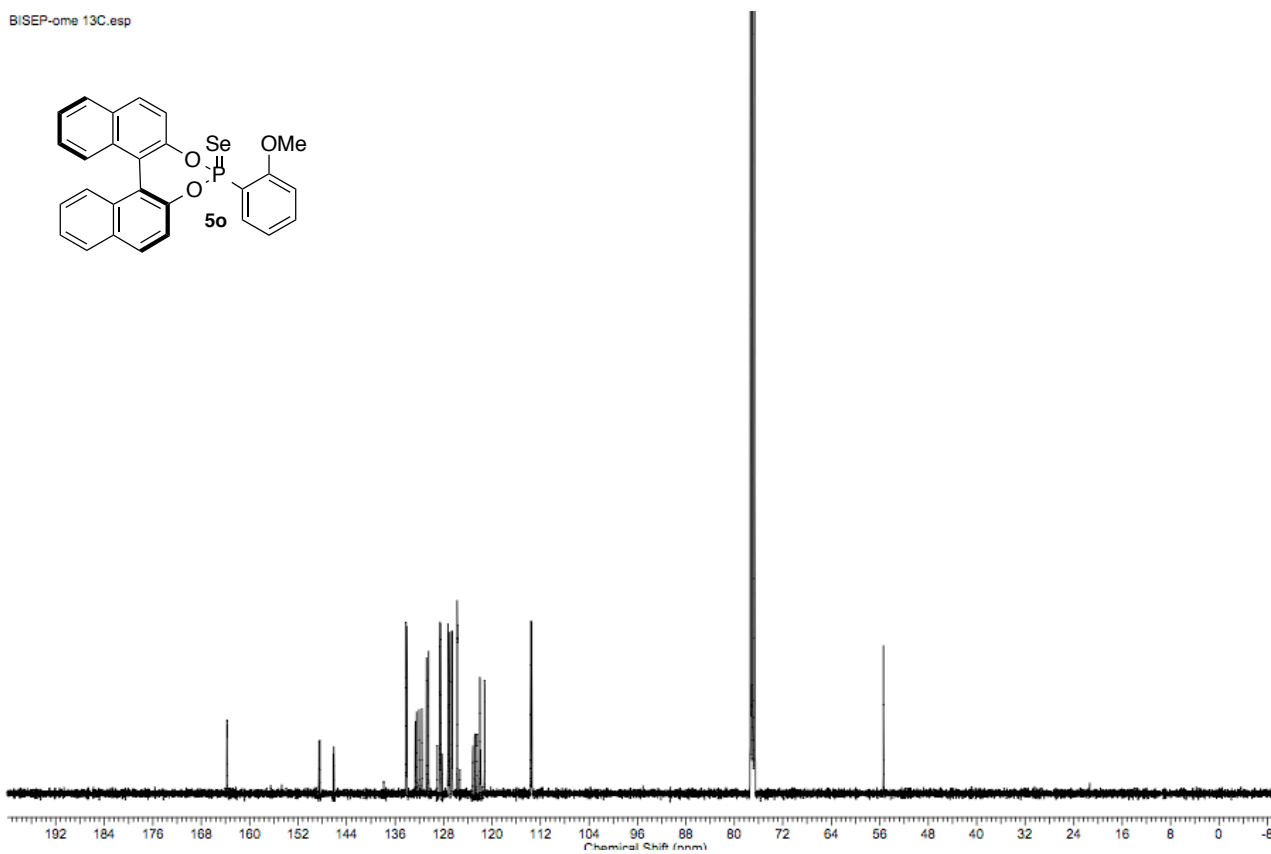

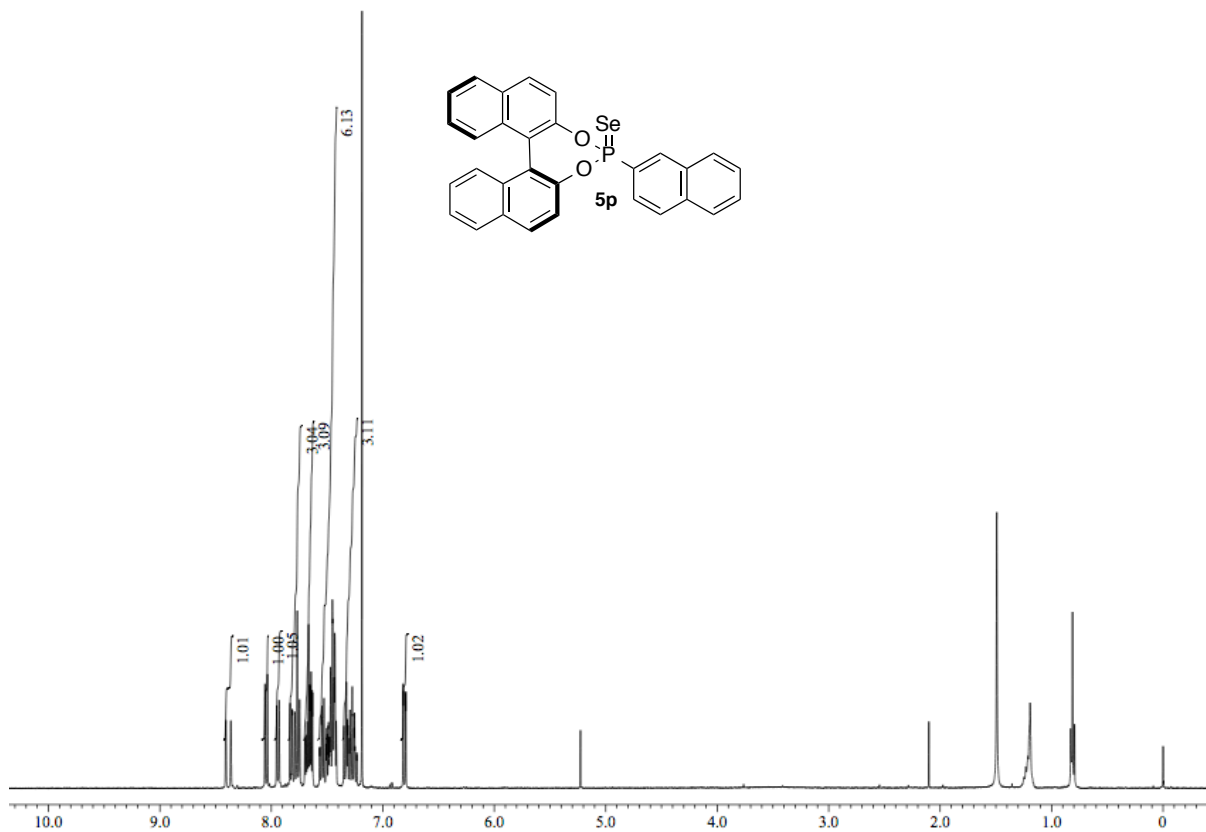

KK Naph 13C.jdf

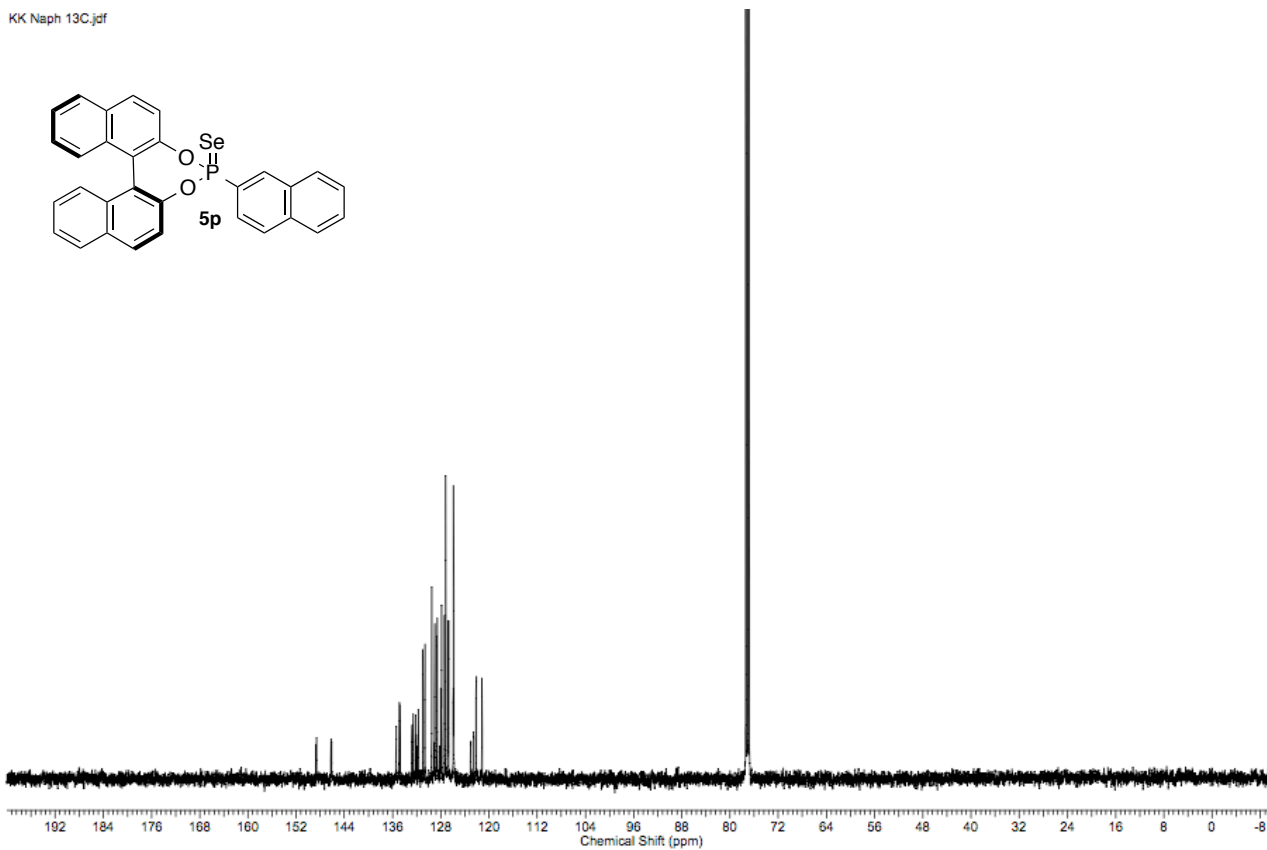

YM783 column16-30 1H-1.jdf

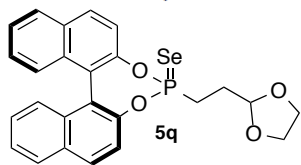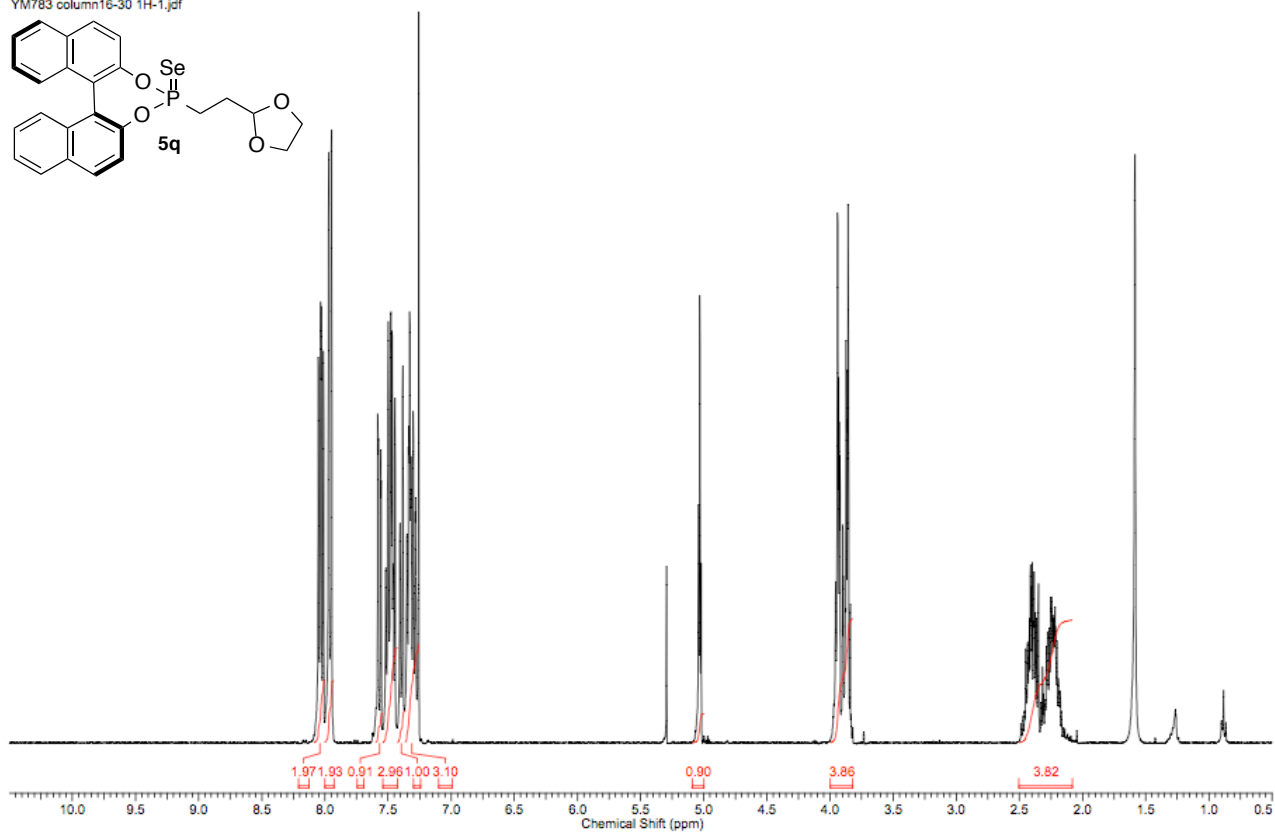

YM783 column 13C-1.jdf

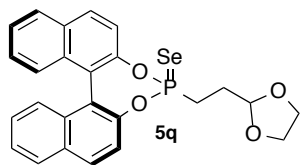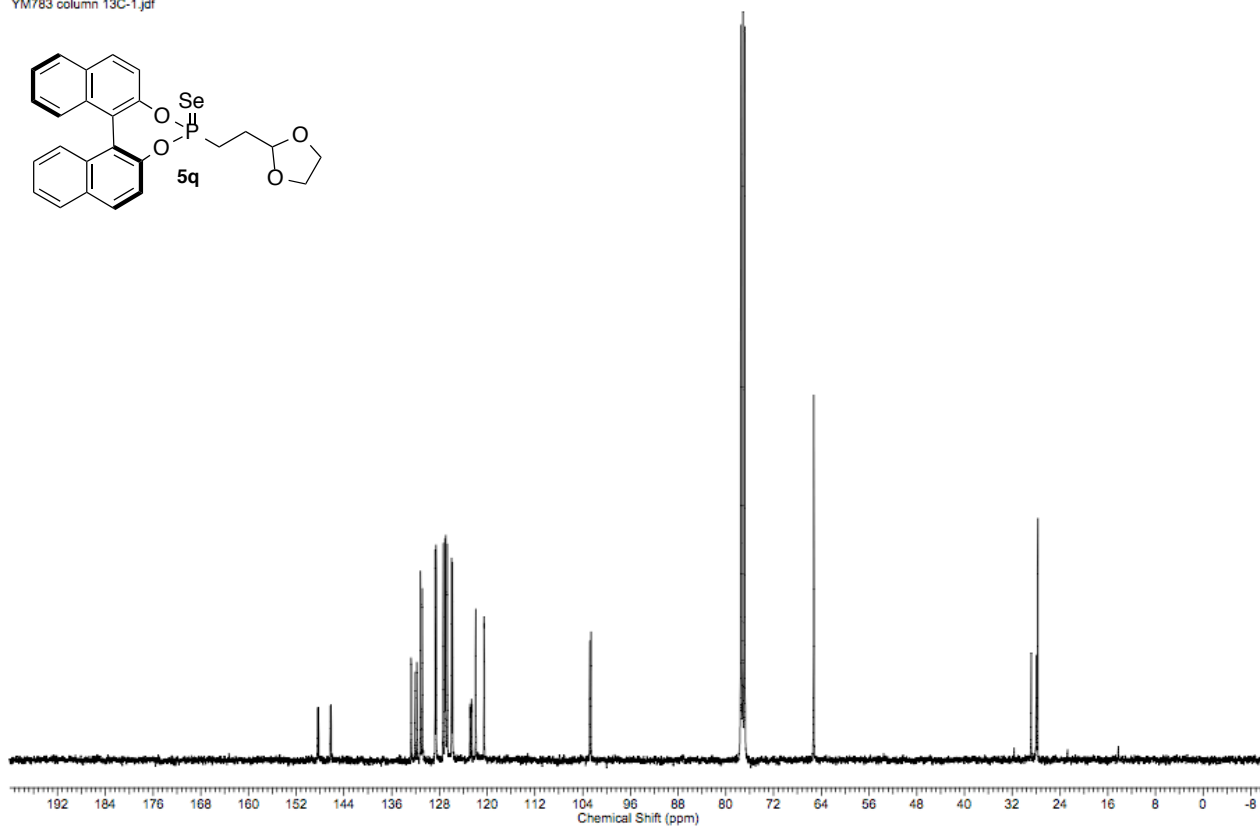



BISEPSeEt 1H-5.jdf

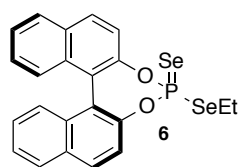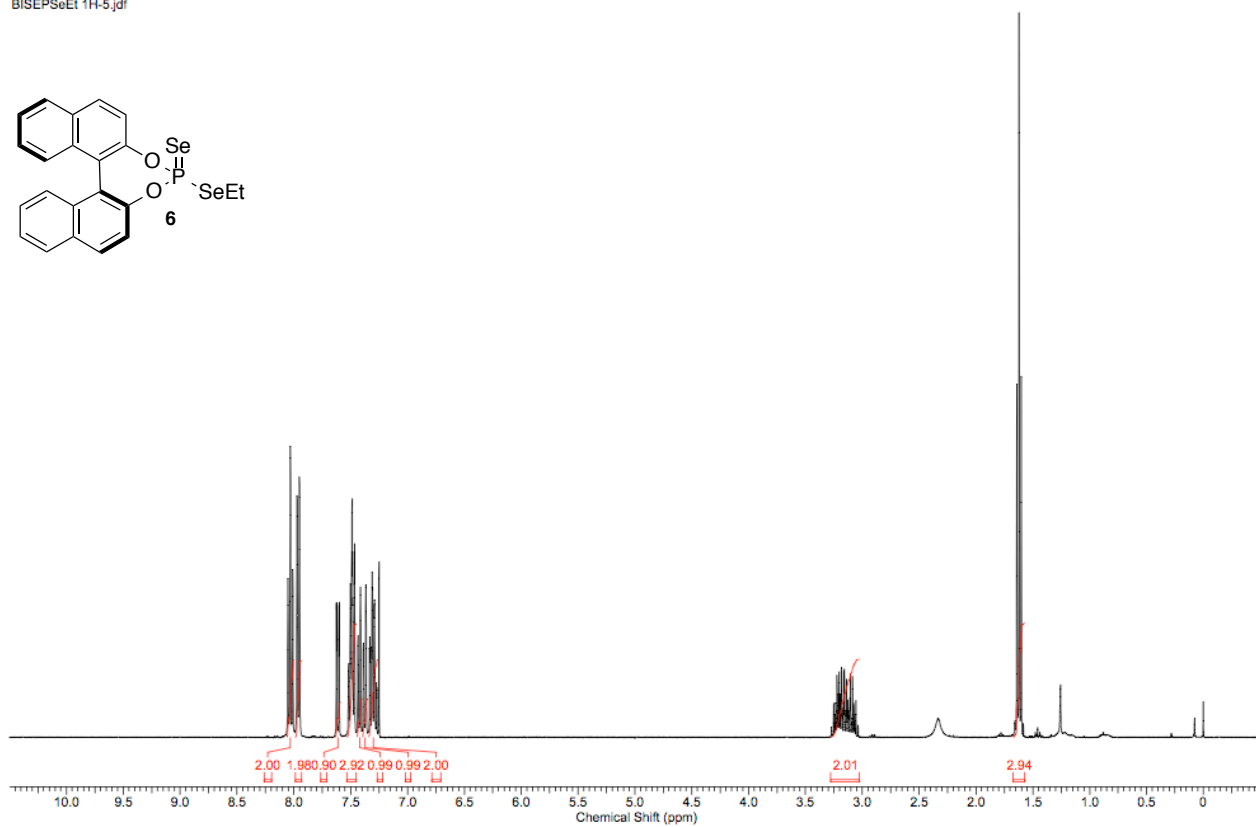

BISEPSeEt 13C-1.jdf

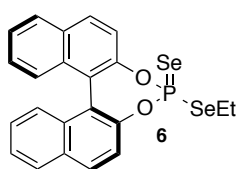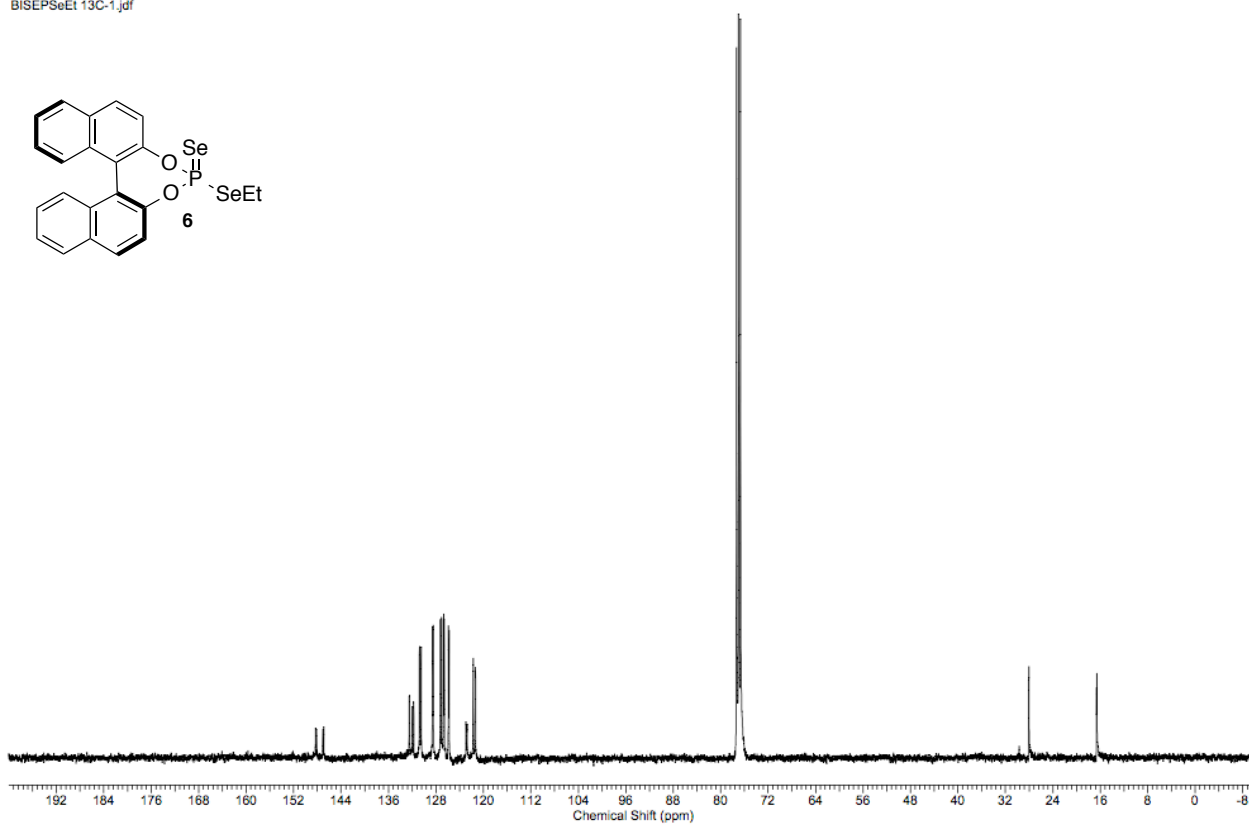

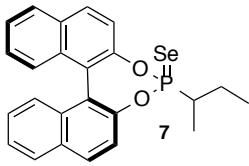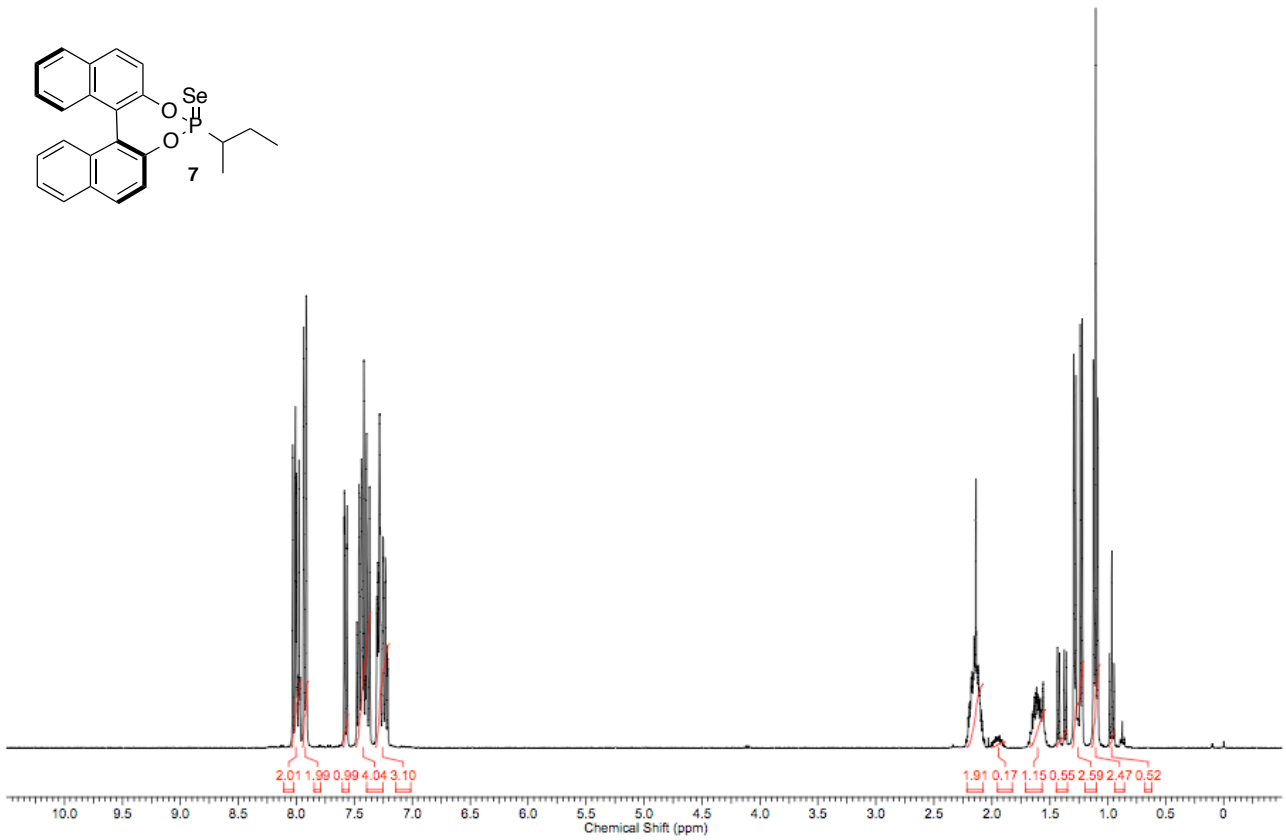

YH 254 nokori 11-1 13C-1.esp

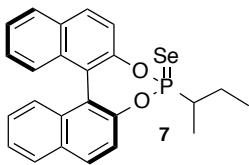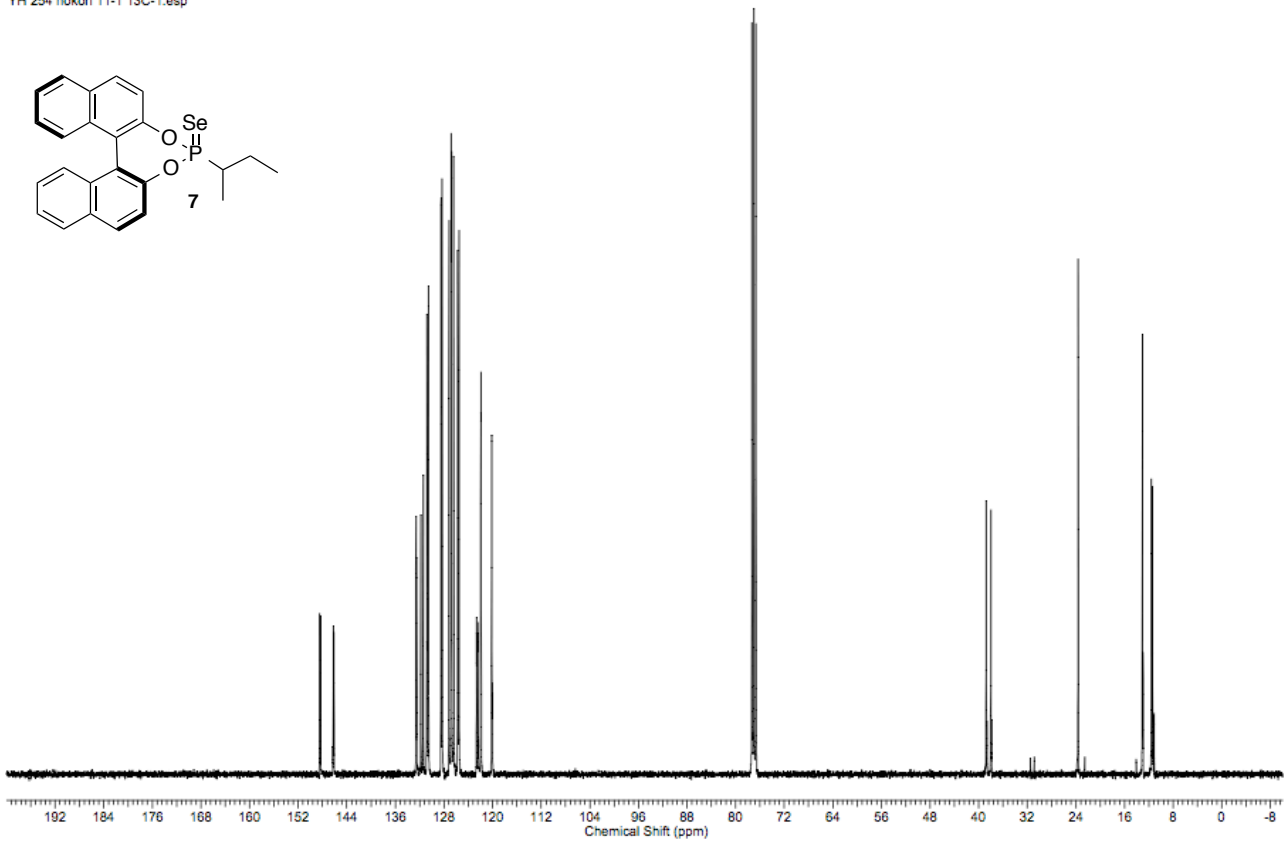

YH 254 recrystal 15 1H-1.esp

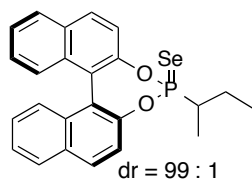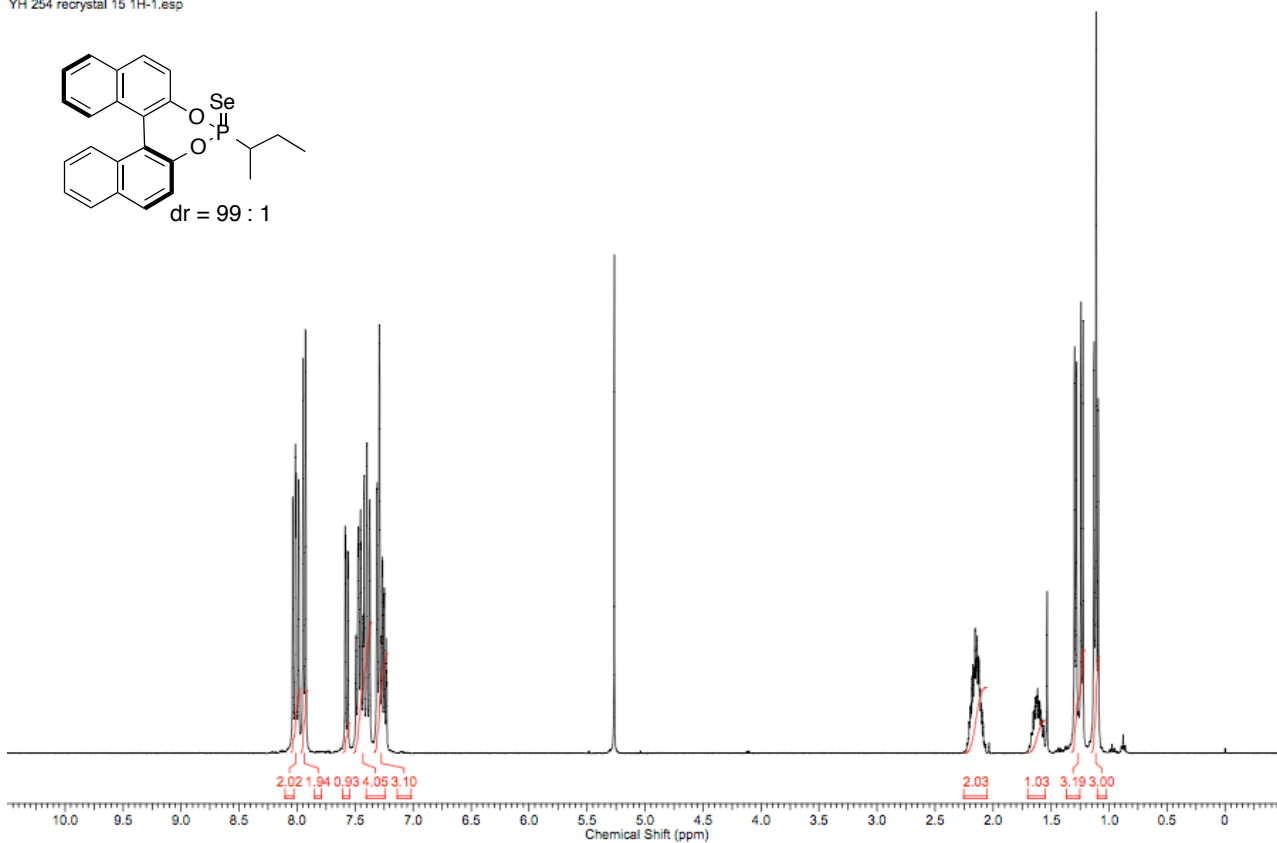

YH 254 recrystal 15 13C-1.esp

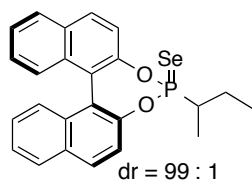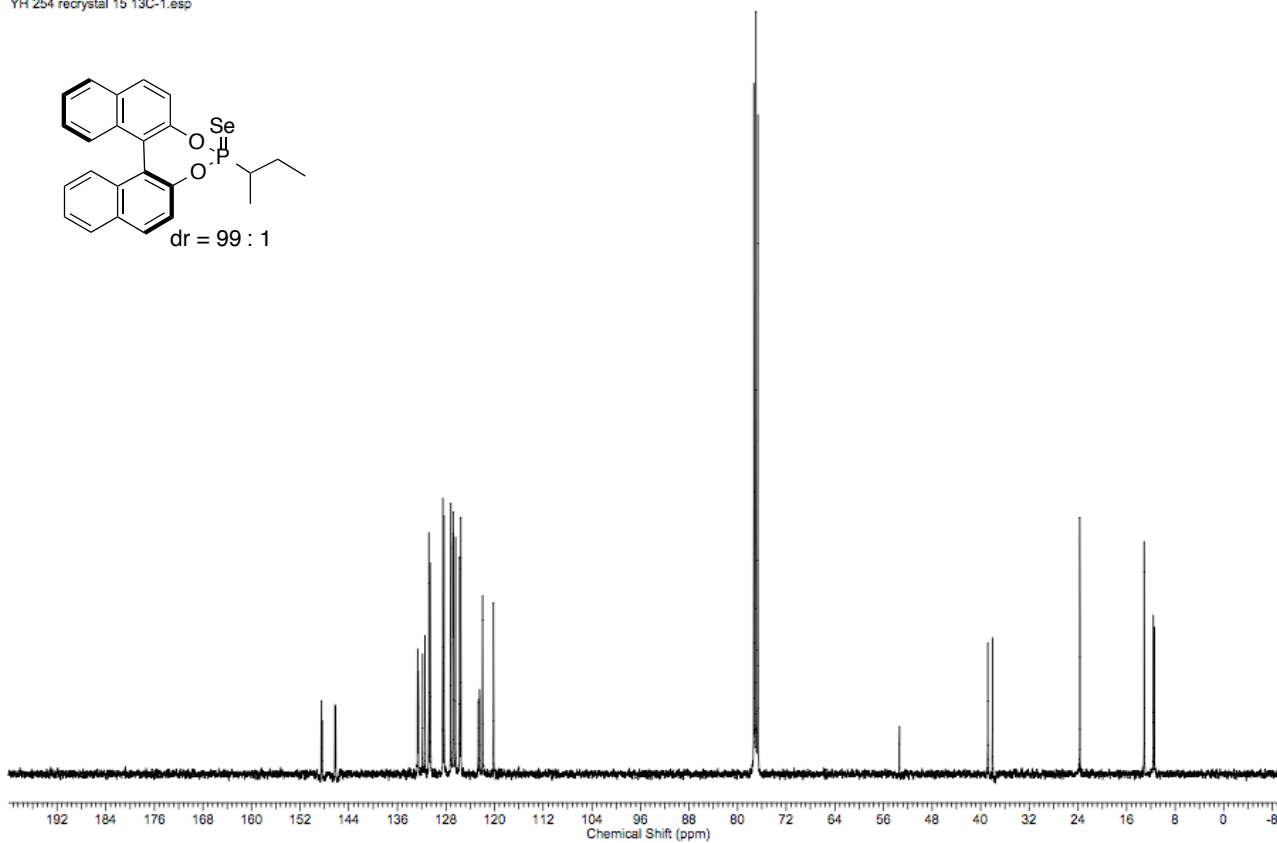

YH 290 GPC 44-51 1H-1.esp

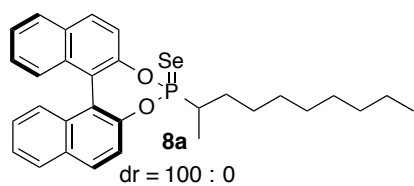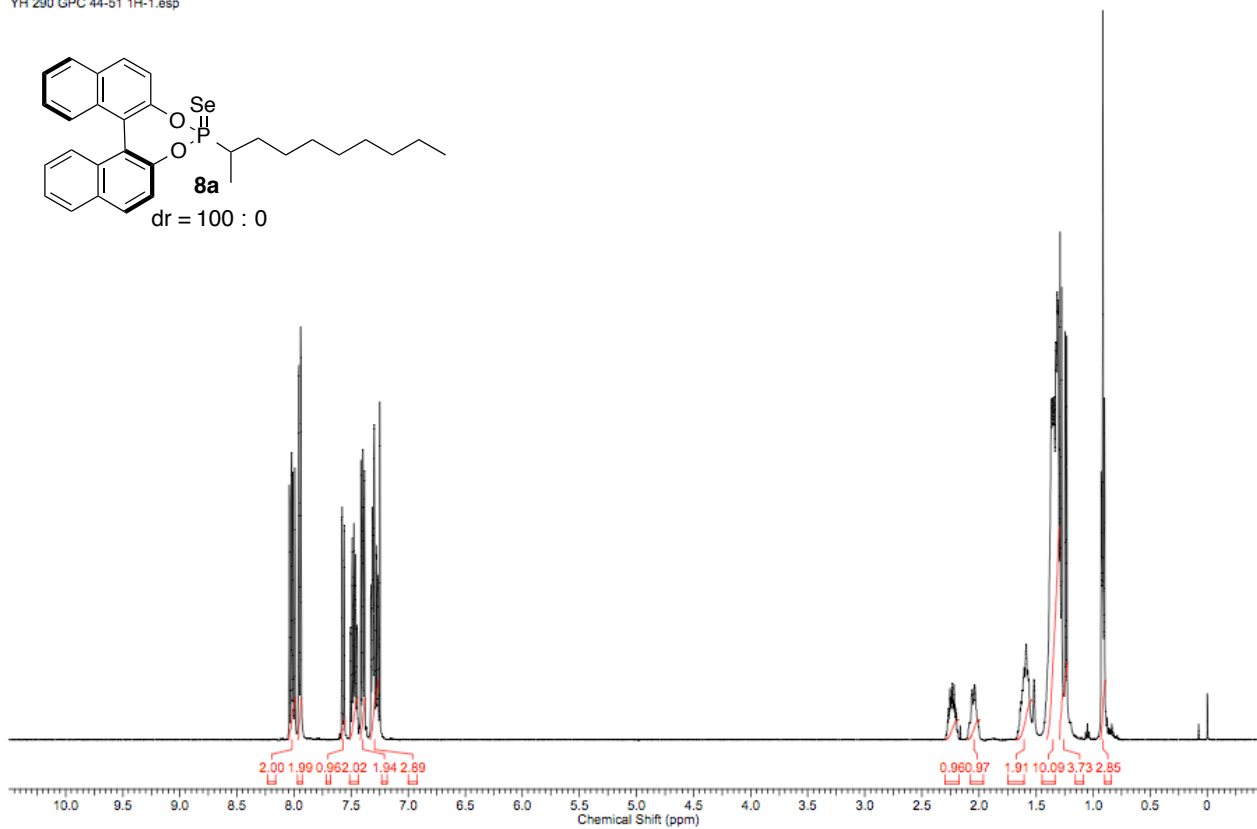

YH 290 GPC 44-51 13C-1.esp

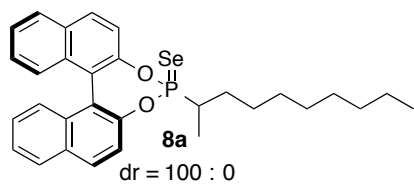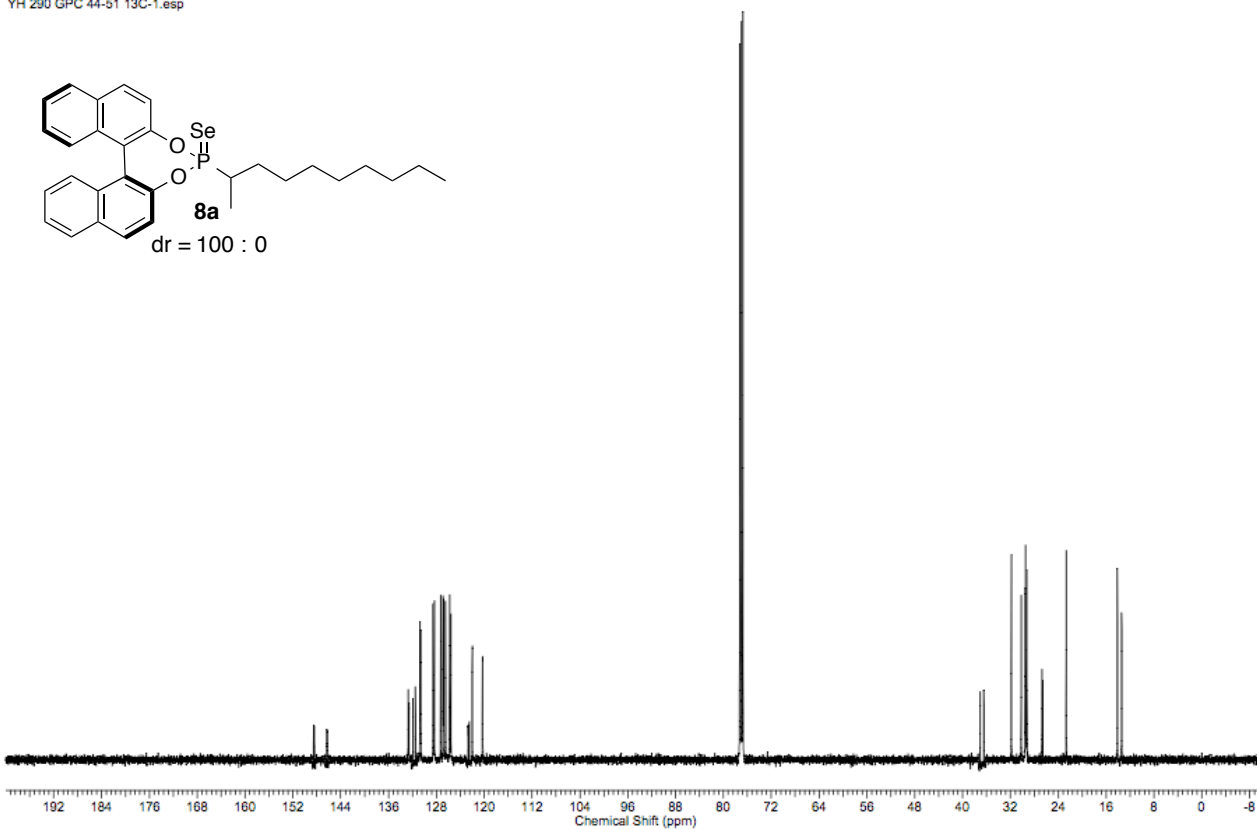

YH 290 GPC 55-69 1H-1.esp

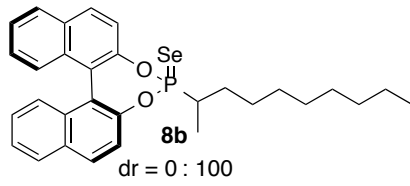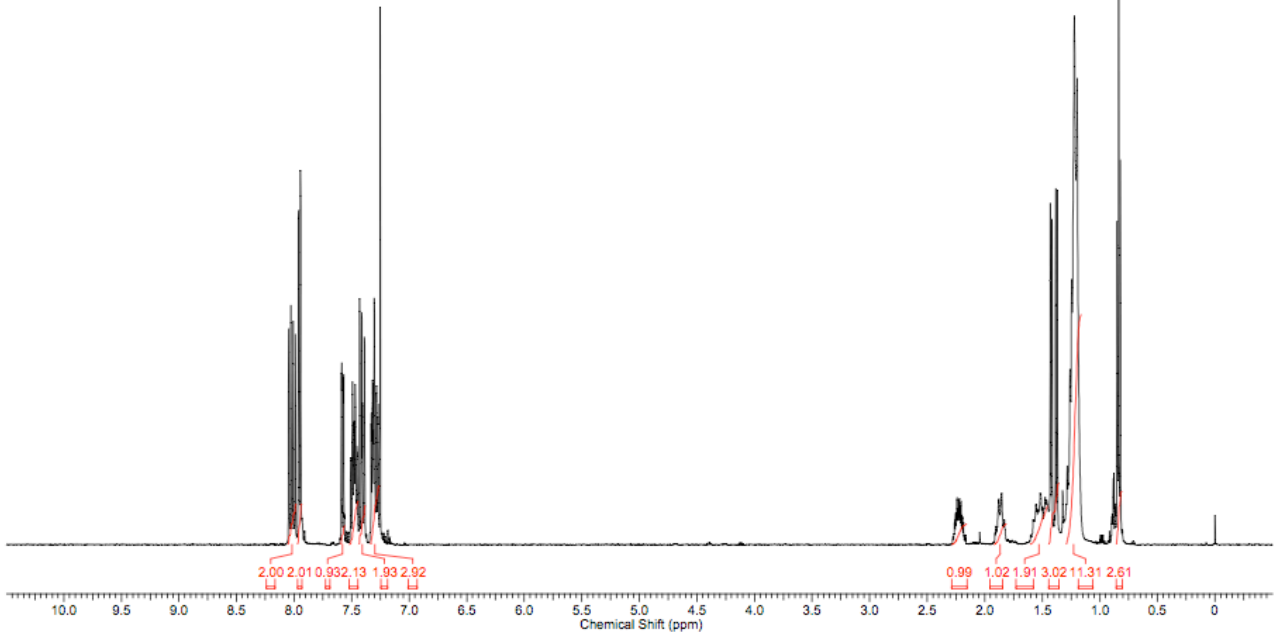

YH 290 GPC 55-69 13C-1.esp

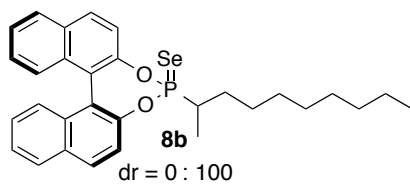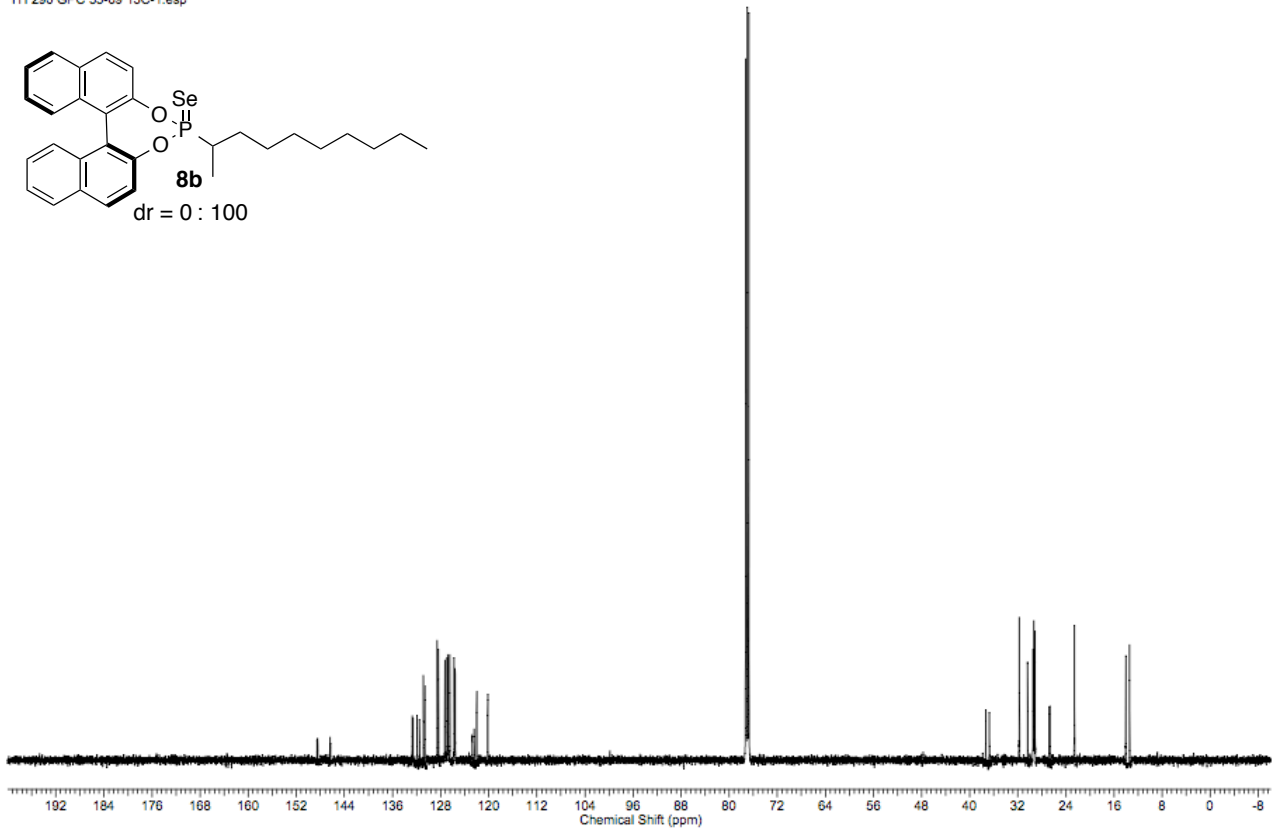

YH 256 nokori 3-2 1H-1.esp

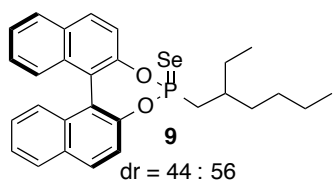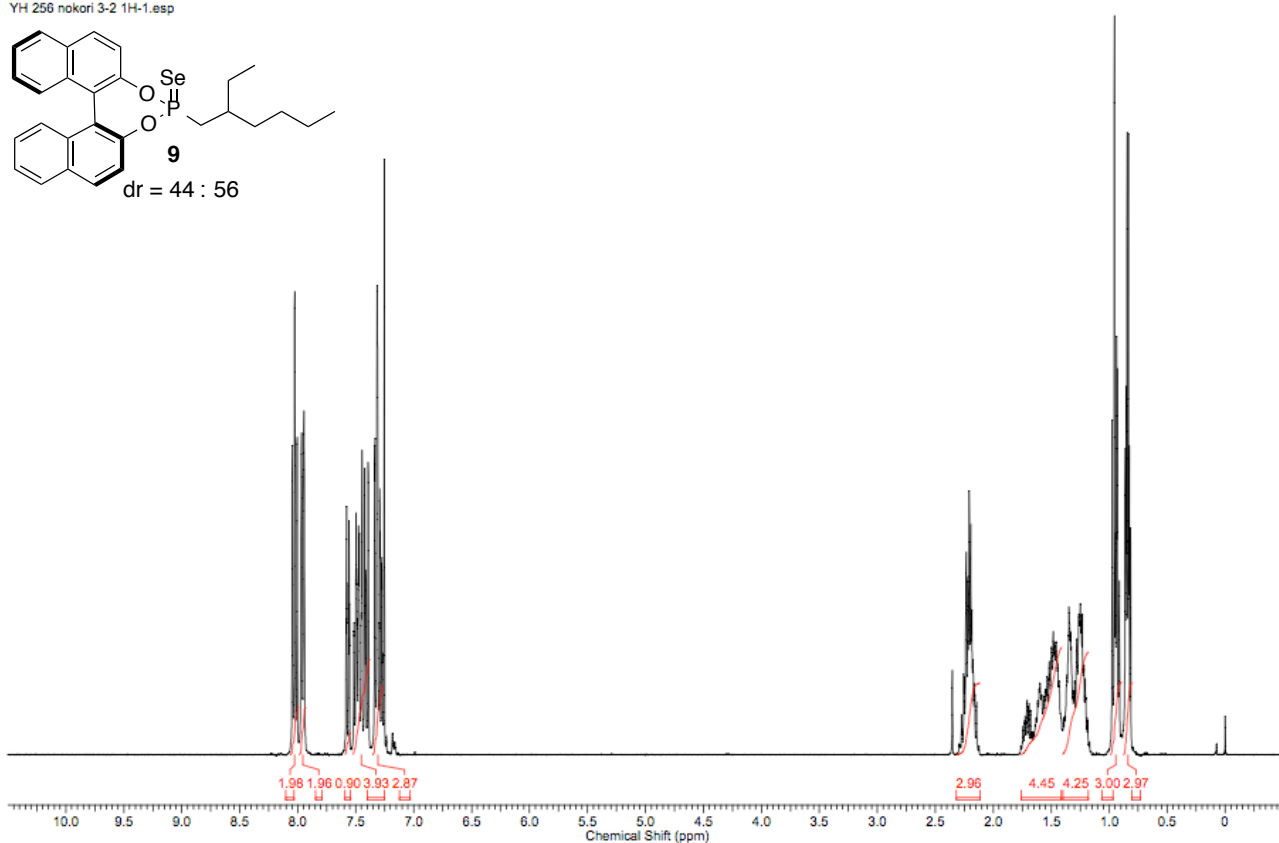

YH 256 nokori 3-2 13C-1.esp

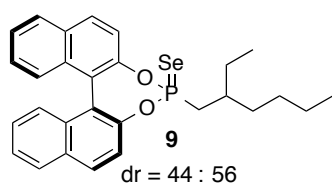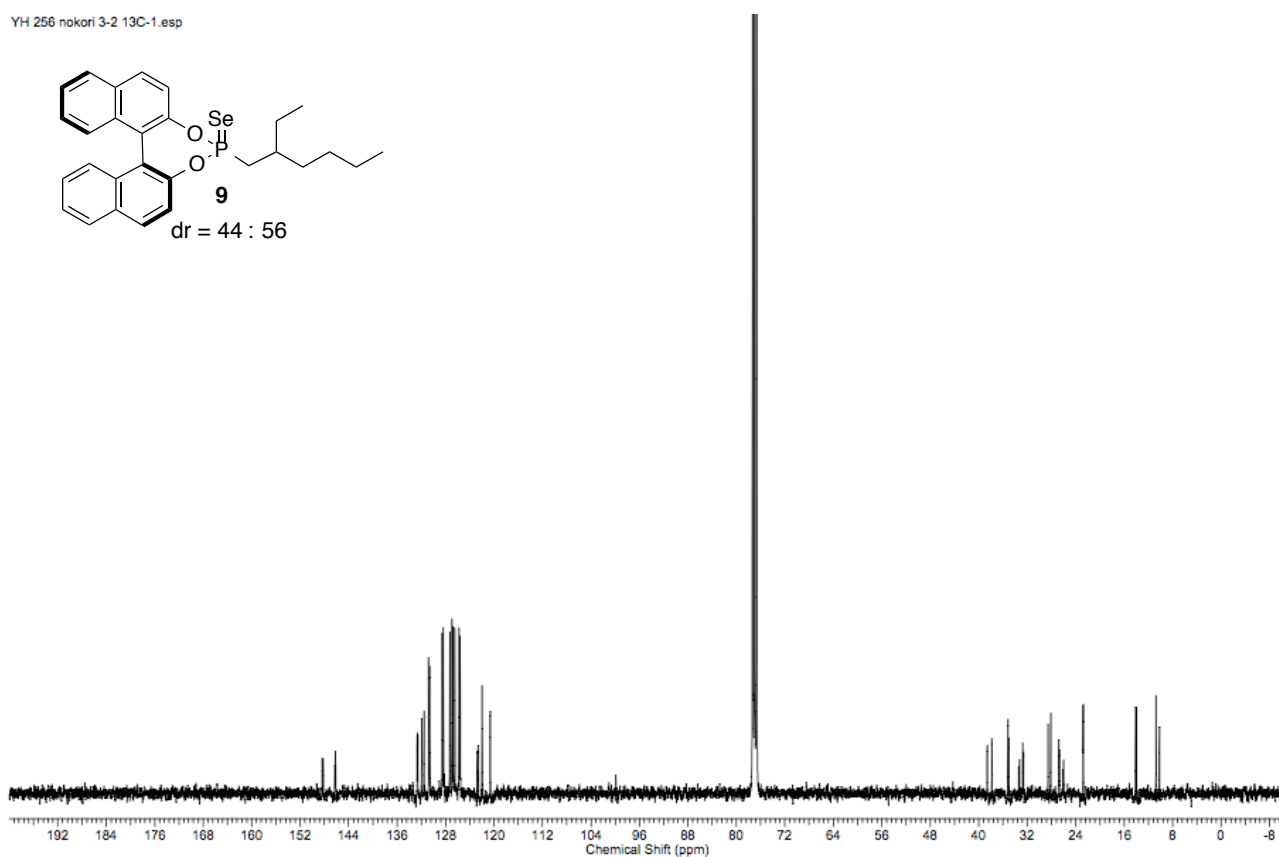

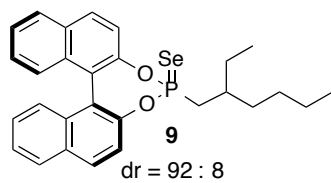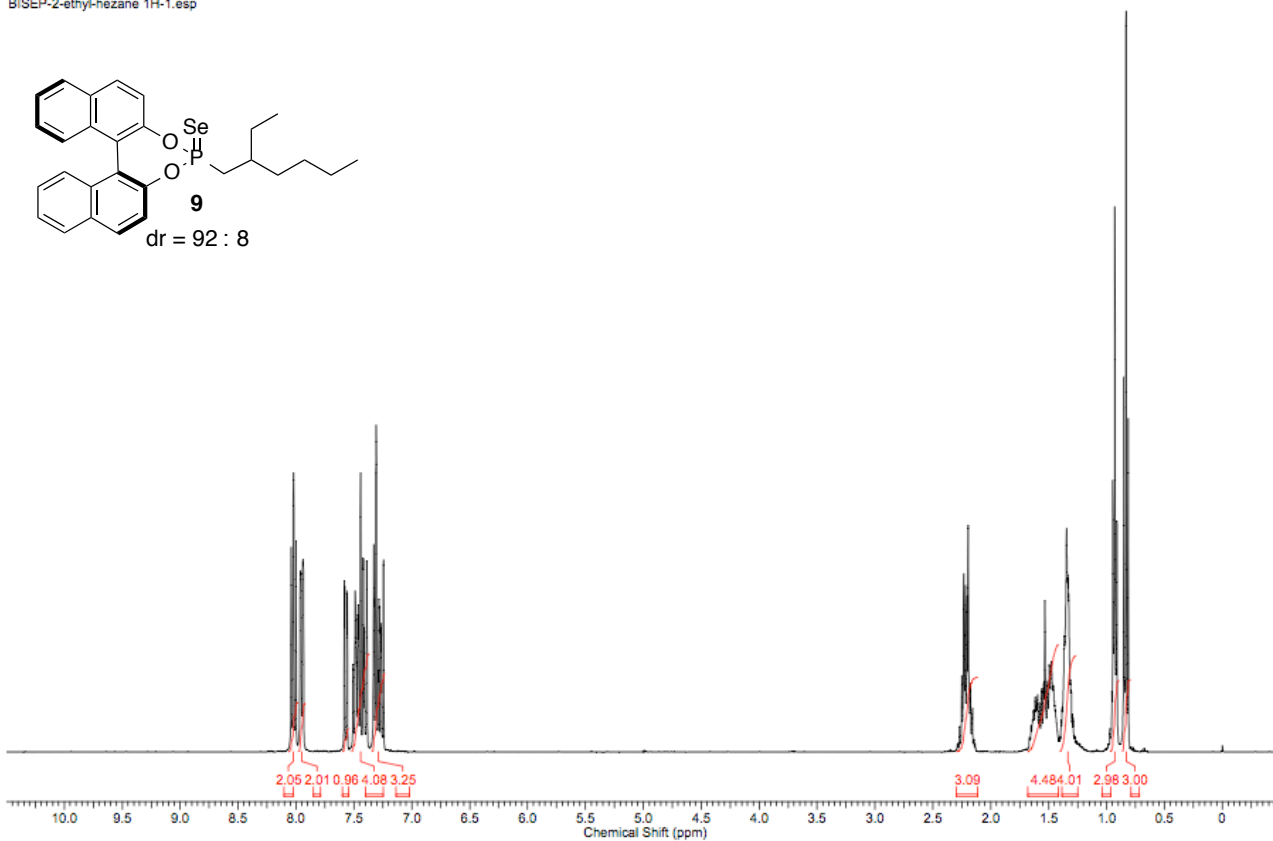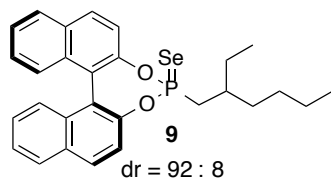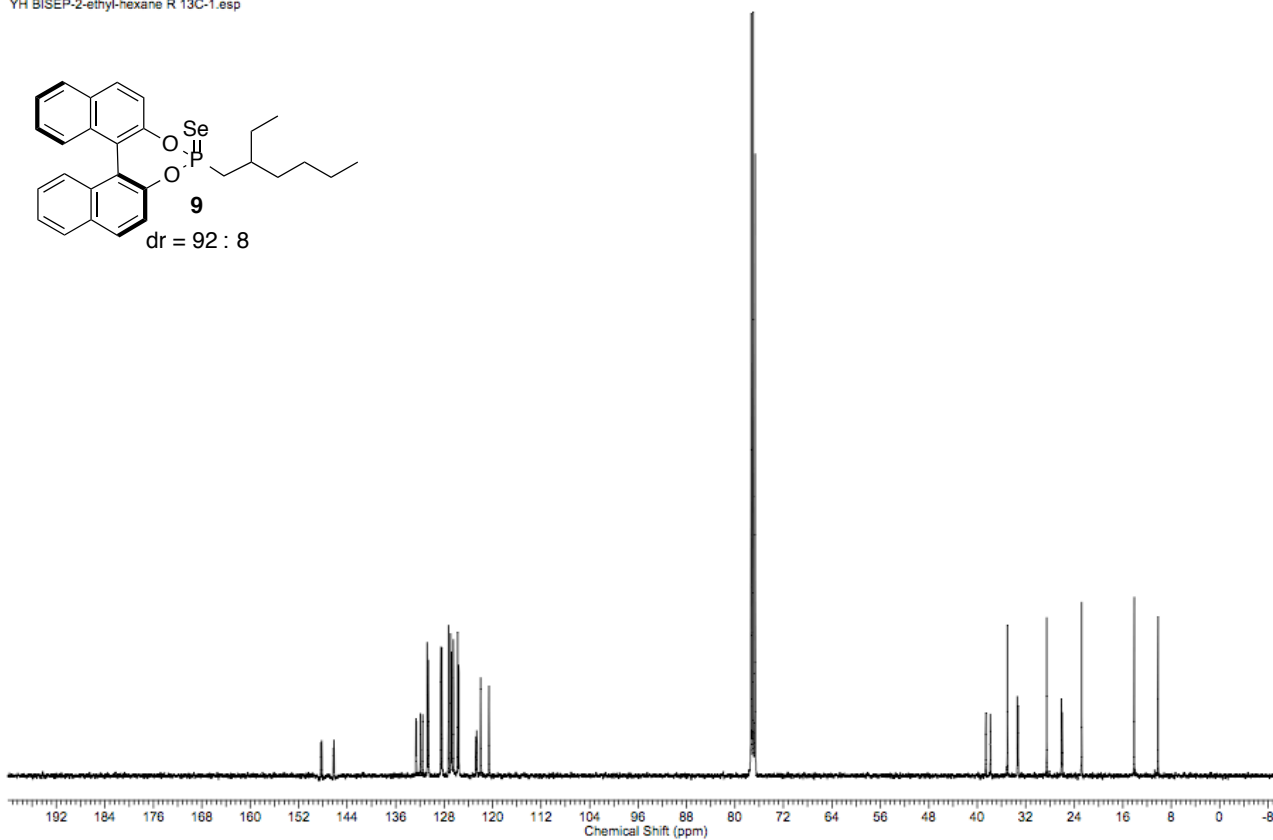

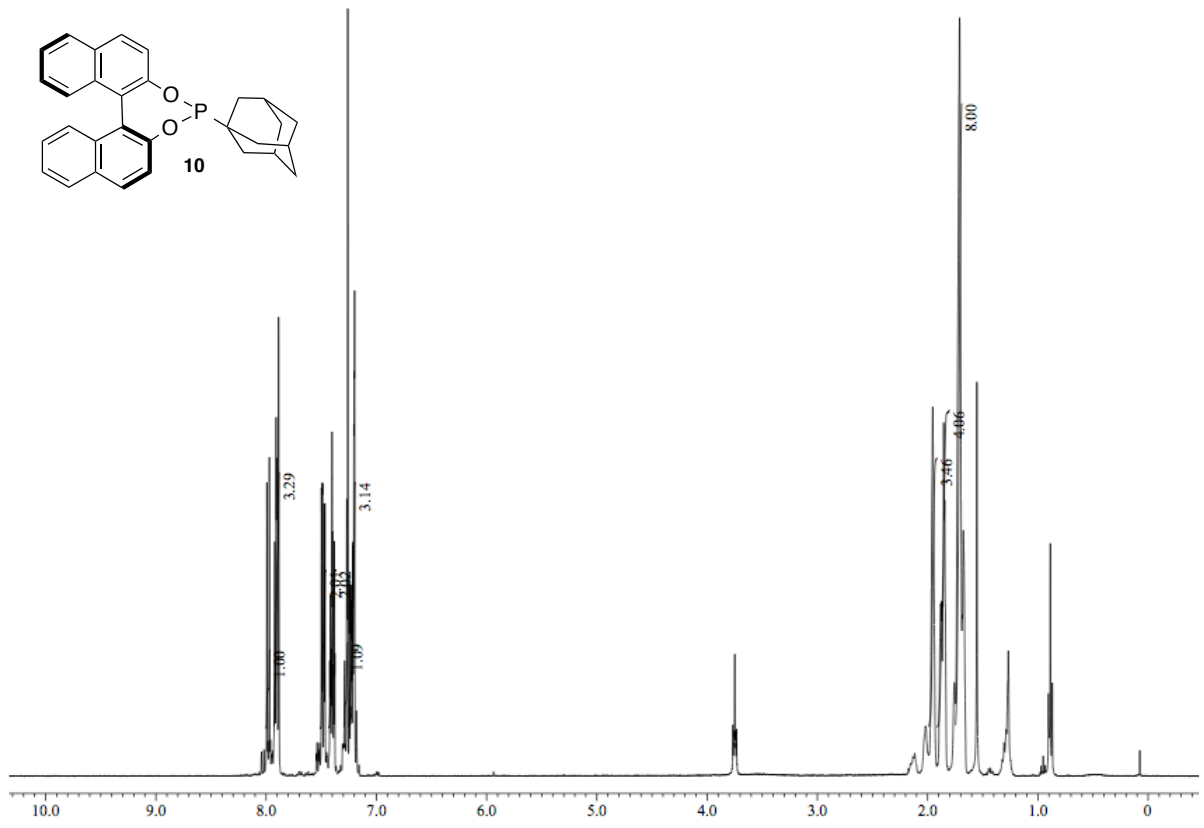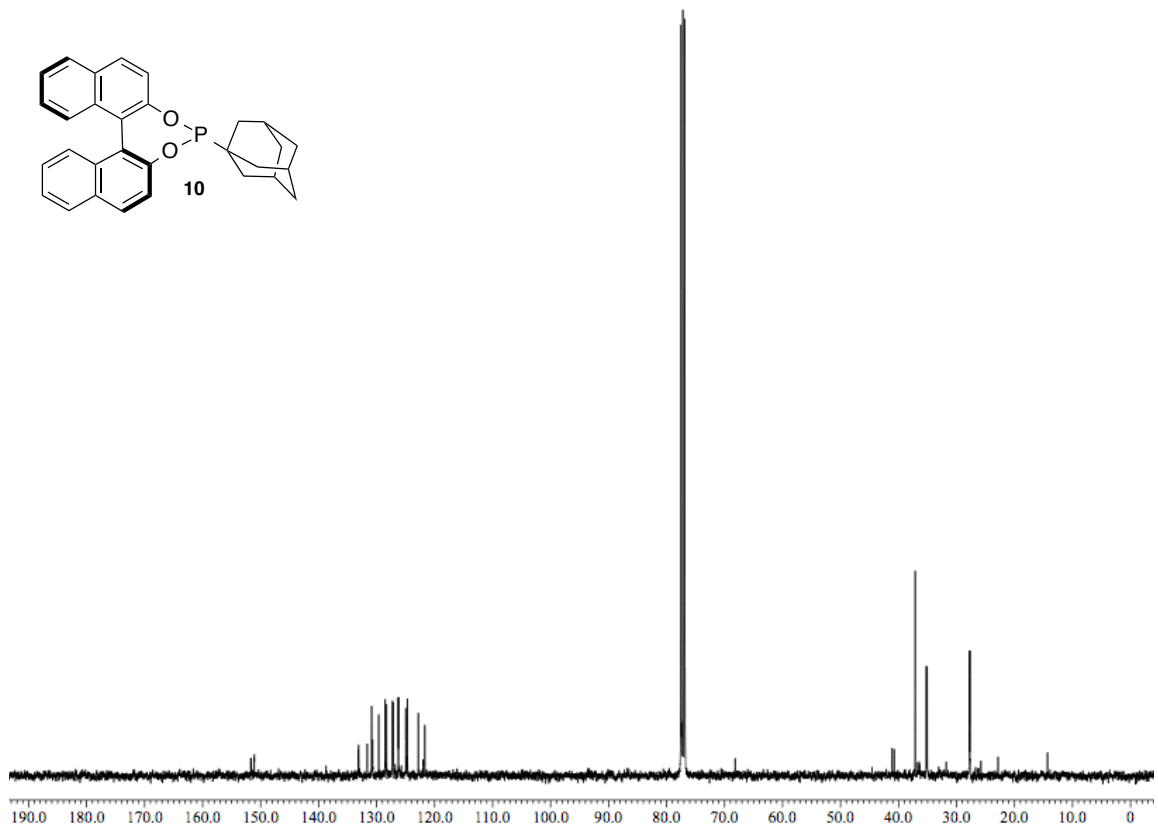



YH 273 column 7-19 2 1H-1.esp

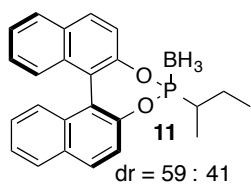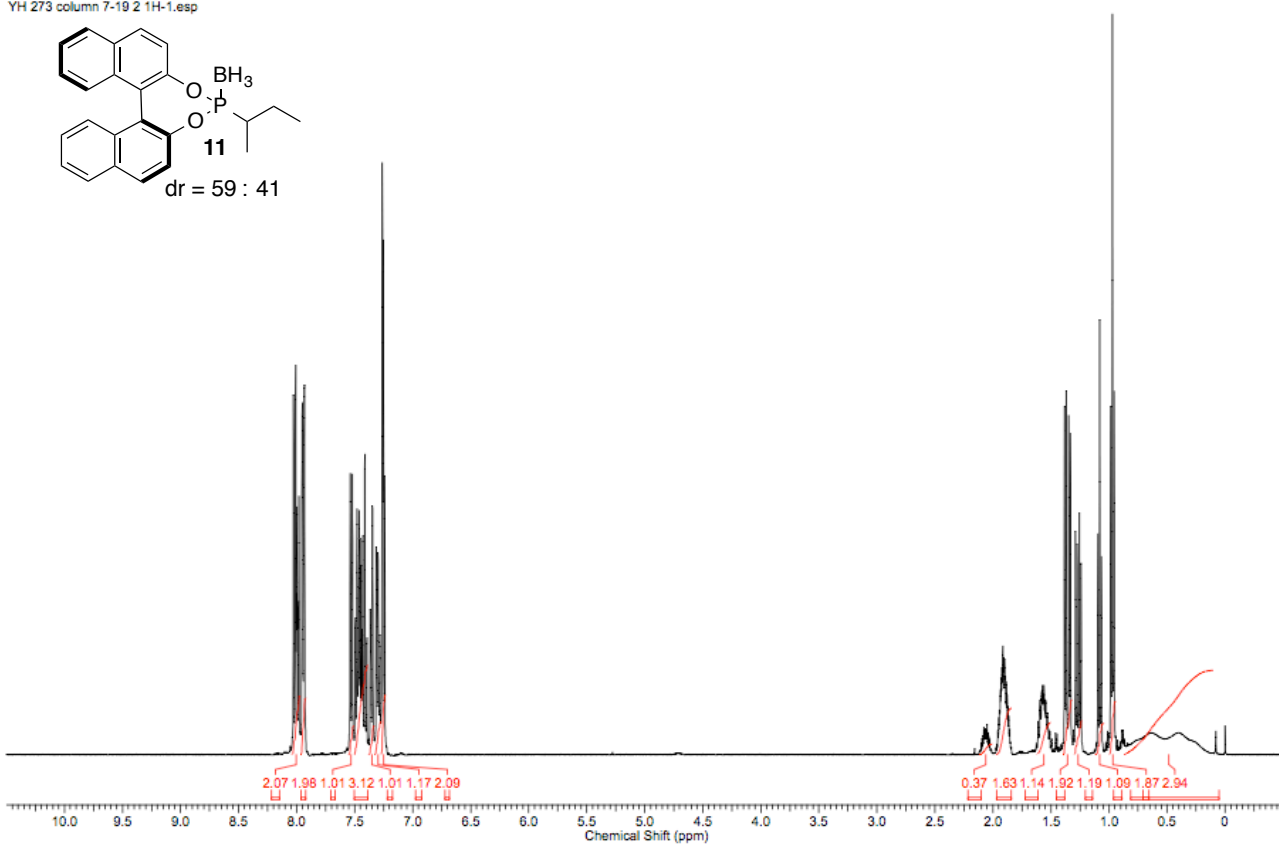

YH 273 column 7-19 13C-1.esp

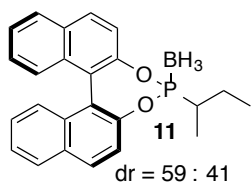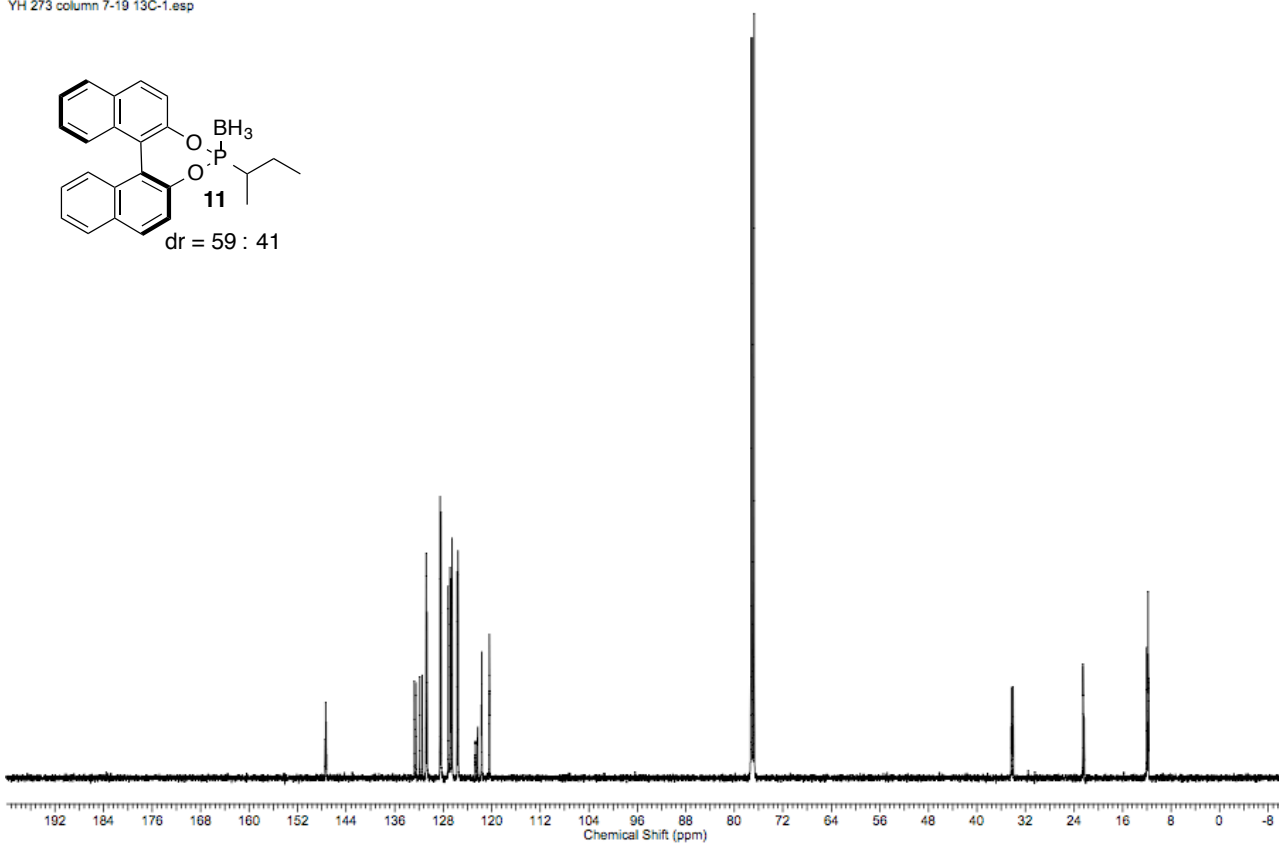

YH 264 column 10-15-3 1H-1.esp

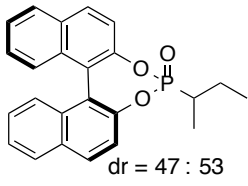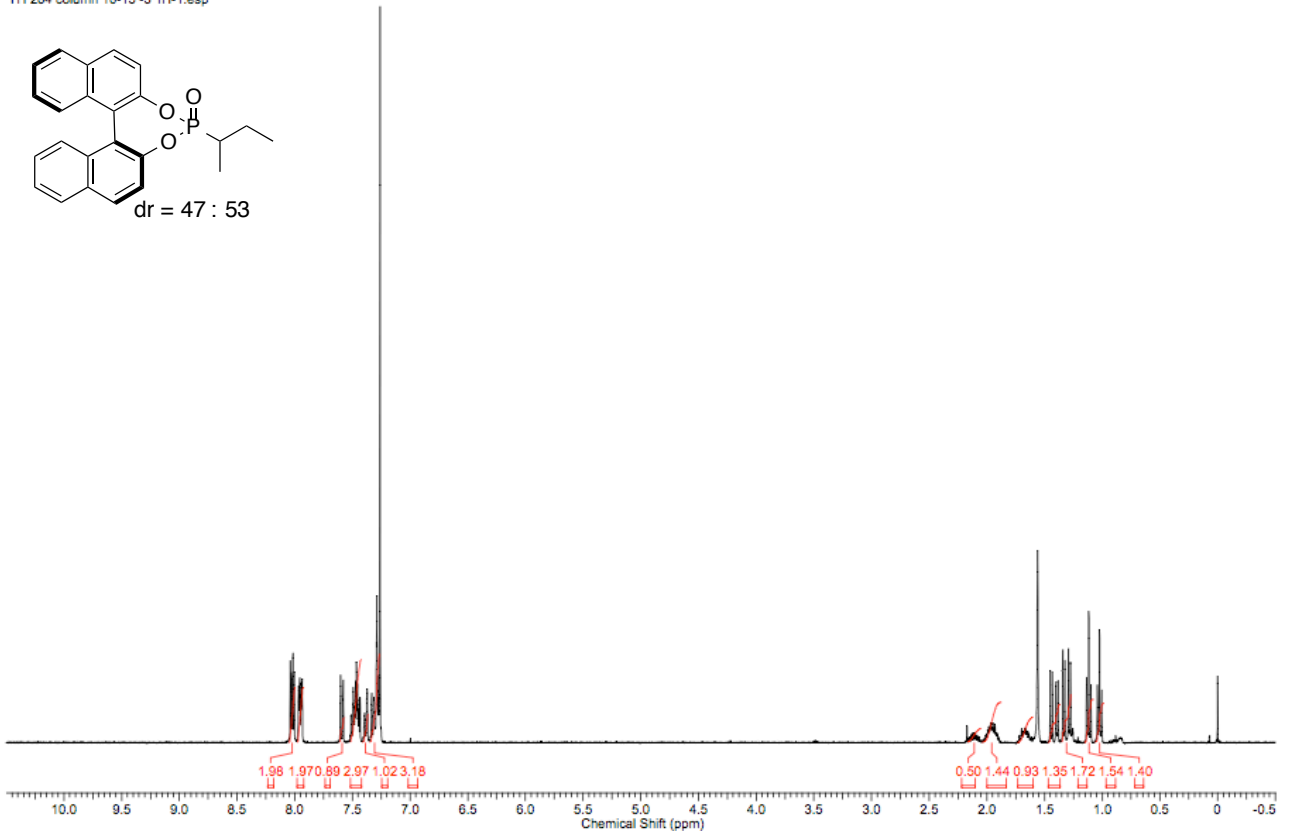

YH 264 column 10-15 13C-1.esp

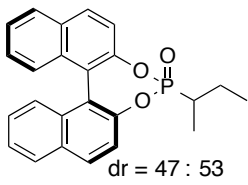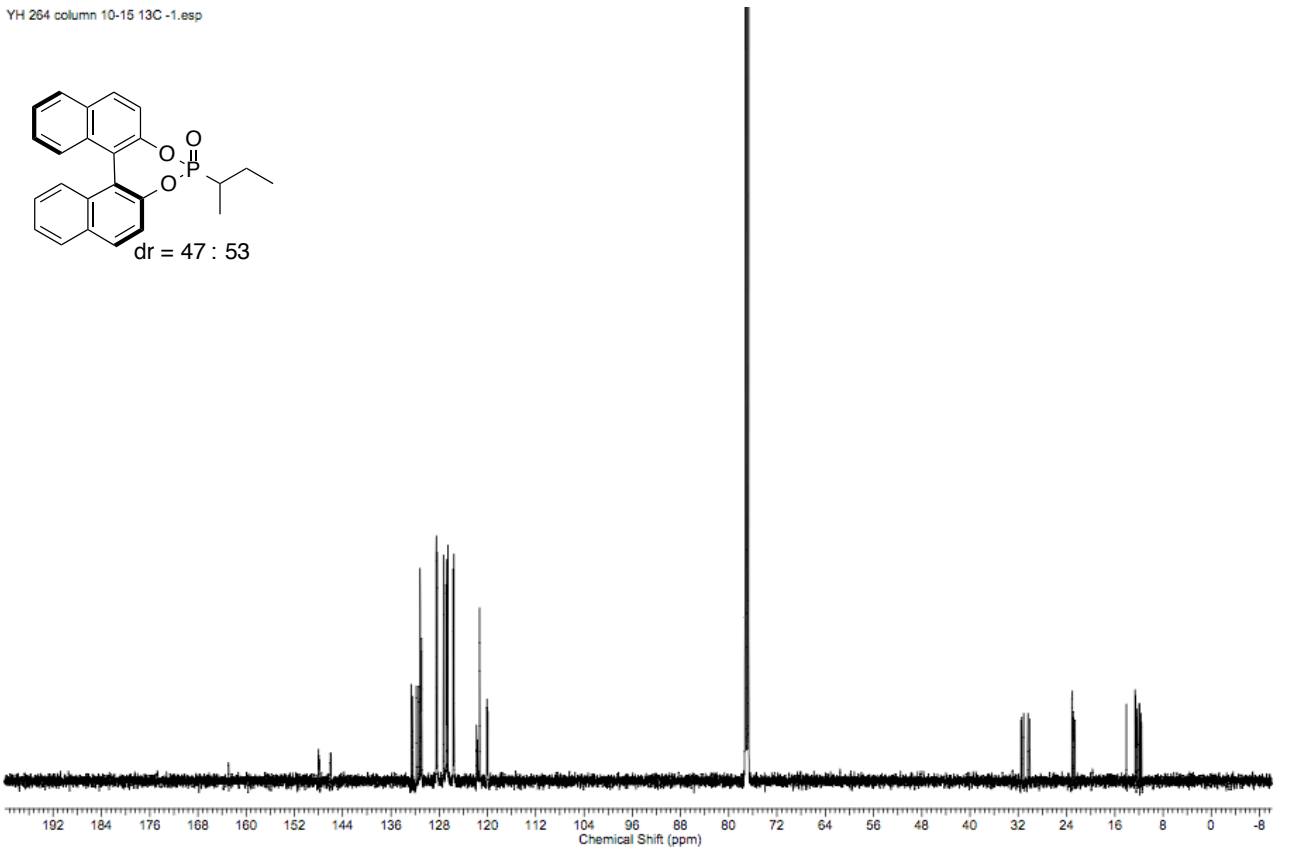

7a, 7b.esp

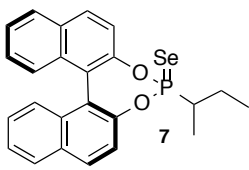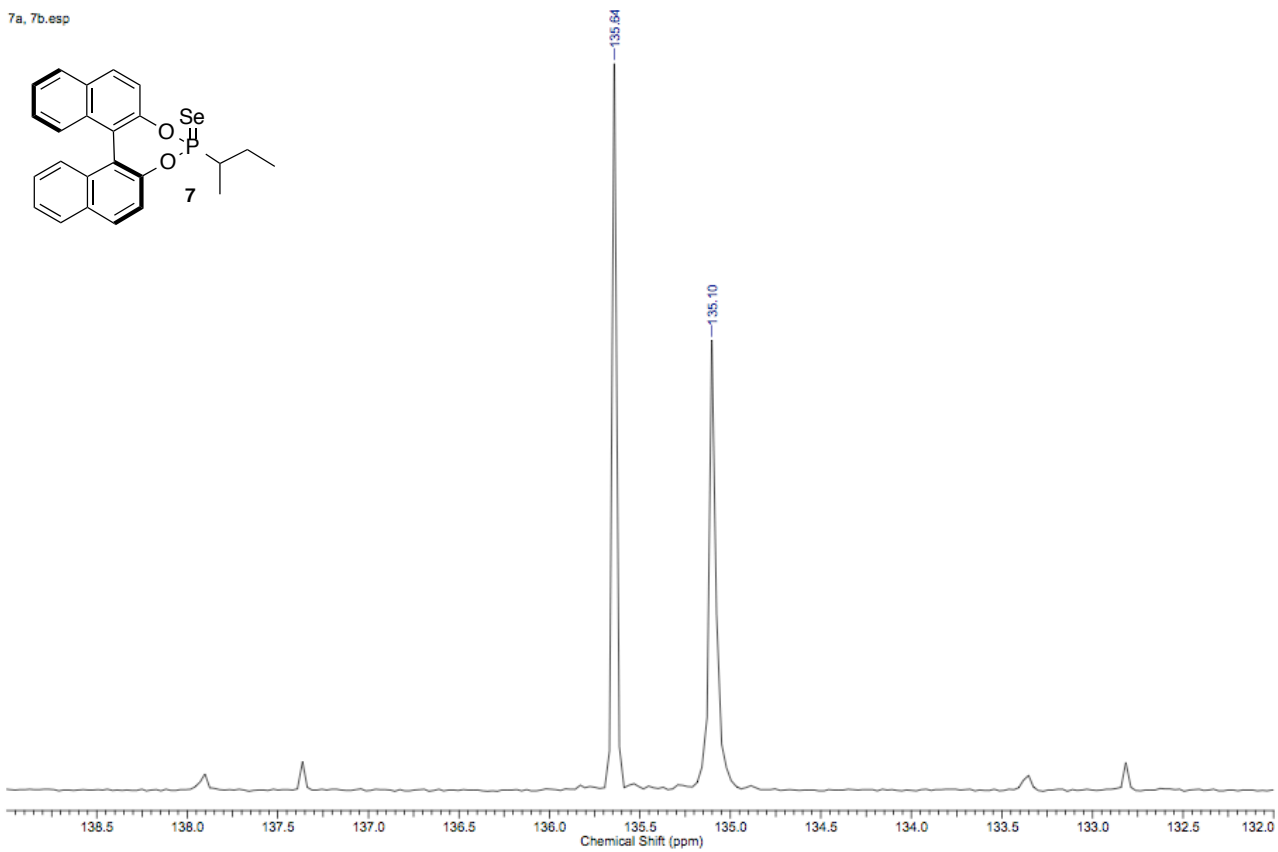

8a, 8b.esp

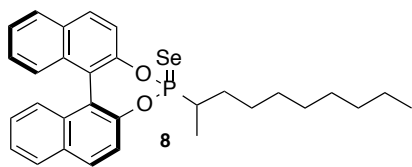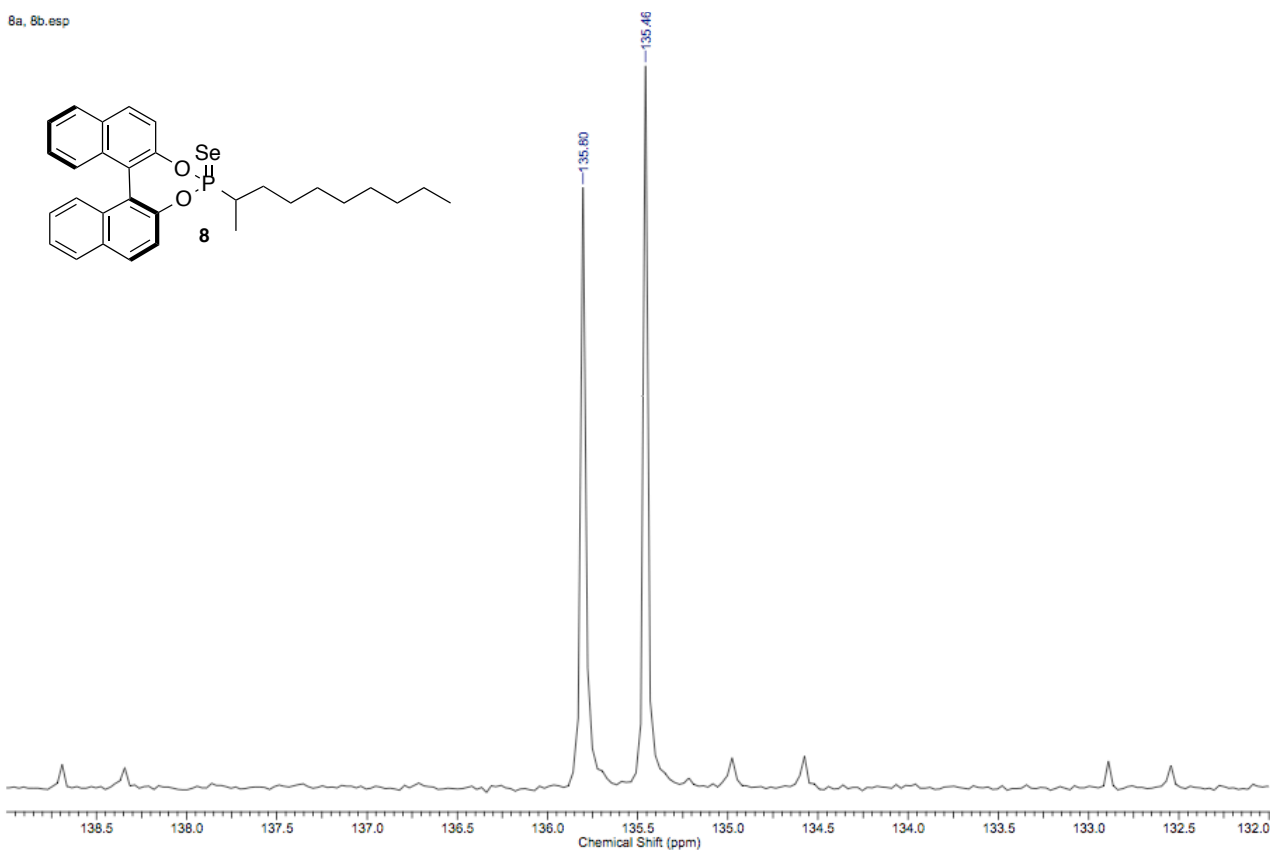

9.esp

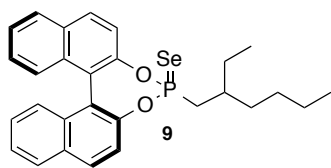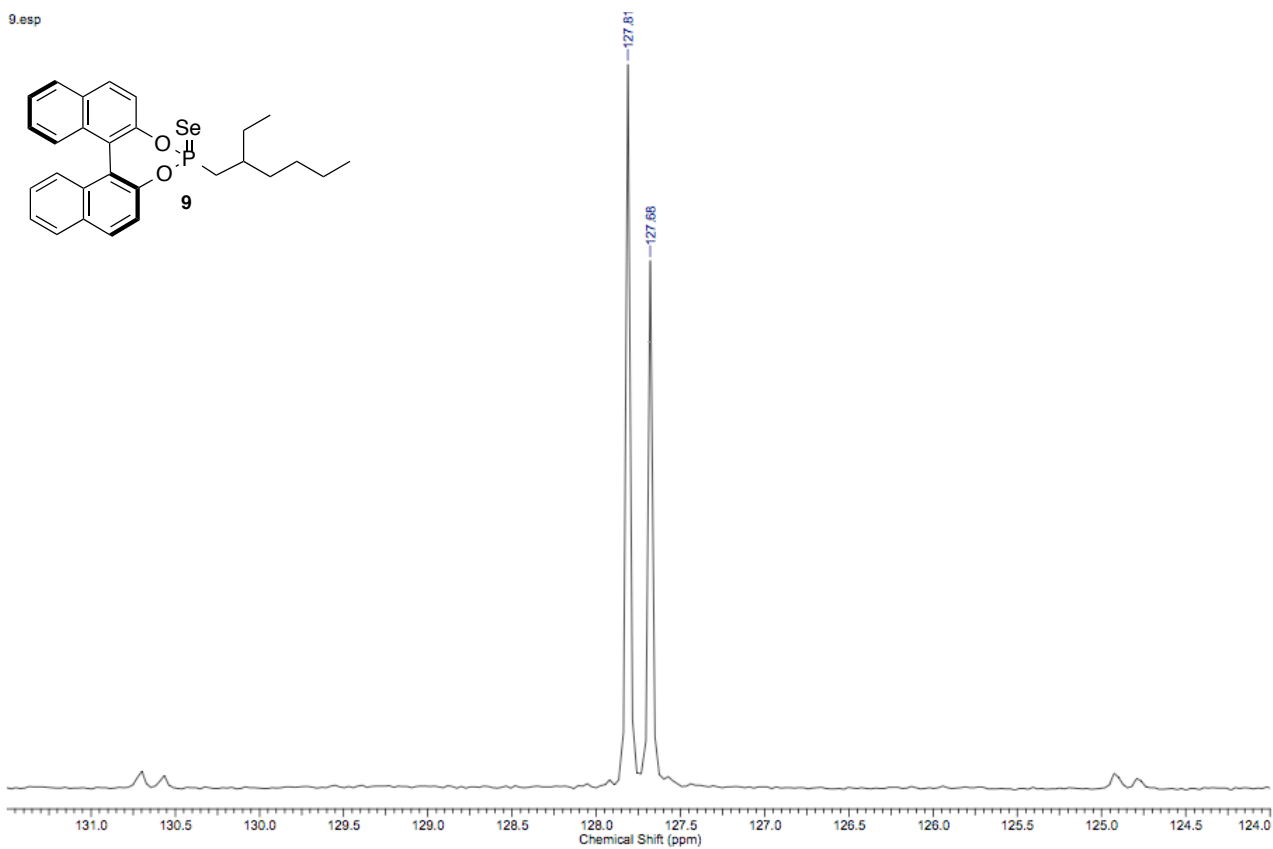

YH 264 column 10-15 31P-1.esp

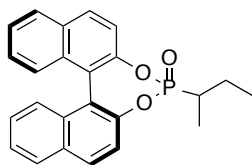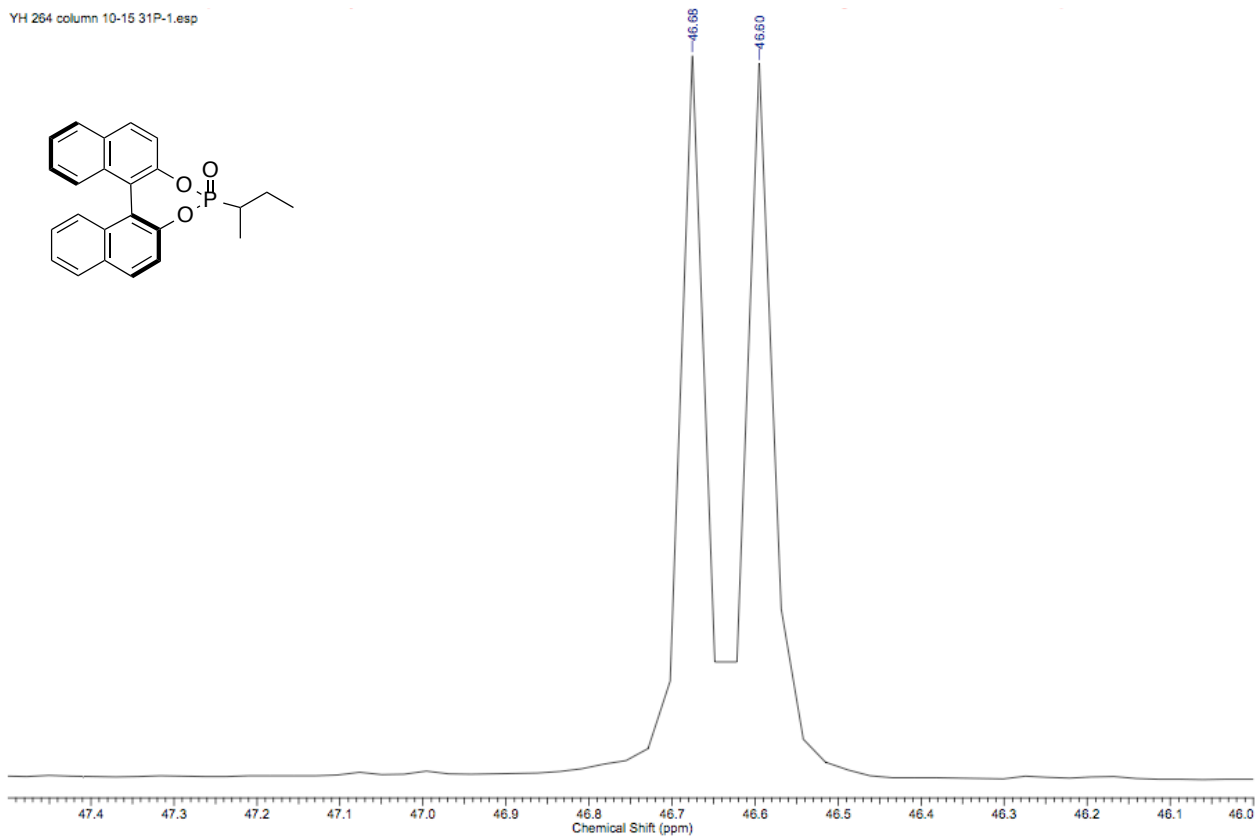

Supplement: c6ra00318d1.pdf [file c6ra00318d1.pdf]
